# Supplementary material for: Anti-HIV terpenoids from Daphne aurantiaca Diels. stems
Source: Royal Society of Chemistry journal article supplement (doi:10.1039/c5ra17099k), 2015-01-01

## Appendix A. Supplementary Data:

### Anti-HIV Terpenoids from *Daphne aurantiaca* Diels. Stems

Sheng-Zhuo Huang,<sup>a</sup> Xuan Zhang,<sup>b</sup> Qing-Yun Ma,<sup>a</sup> Yong-Tang Zheng,<sup>b</sup> Hao-Fu Dai,<sup>a</sup> Qi Wang,<sup>a</sup> Jun Zhou,<sup>\*,c</sup> and You-Xing Zhao<sup>\*,a</sup>

<sup>a</sup> *Key Laboratory of Biology and Genetic Resources of Tropical Crops, Ministry of Agriculture, Institute of Tropical Bioscience and Biotechnology, Chinese Academy of Tropical Agriculture Sciences, Haikou 571101, People's Republic of China*

<sup>b</sup> *Key Laboratory of Animal Models and Human Disease Mechanisms of Chinese Academy of Sciences & Yunnan Province, KIZ-CUHK Joint Laboratory of Bioresources and Molecular Research of Common Diseases, Kunming Institute of Zoology, Chinese Academy of Sciences, Kunming 650204, People's Republic of China*

<sup>c</sup> *State Key Laboratory of Phytochemistry and Plant Resources in West China, Kunming Institute of Botany, Chinese Academy of Sciences, Kunming 650201, People's Republic of China*

\* To whom correspondence should be addressed. Tel: +86-898-66989095. Fax: +86-898-66989095. E-mail: junzhou3264@126.com, zhaoyouxing@itbb.org.cn

## Supporting Information

S1: Figure 2 and 3

S2: <sup>1</sup>H NMR of auranticanol A (1)

S3: DEPT of auranticanol A (1)

S4: HSQC of auranticanol A (1)

S5: <sup>1</sup>H-<sup>1</sup>H COSY of auranticanol A (1)

S6: HMBC of auranticanol A (1)

S7: ROESY of auranticanol A (1)

S8: EIMS of auranticanol A (1)

S9: <sup>1</sup>H NMR of auranticanol B (2)

S10: DEPT of auranticanol B (2)

S11: HSQC of auranticanol B (2)

S12: <sup>1</sup>H-<sup>1</sup>H COSY of auranticanol B (2)

S13: HMBC of auranticanol B (2)  
S14: ROESY of auranticanol B (2)  
S15: ESIMS of auranticanol B (2)  
S16: <sup>1</sup>H NMR of auranticanol C (4)  
S17: DEPT of auranticanol C (4)  
S18: HSQC of auranticanol C (4)  
S19: <sup>1</sup>H-<sup>1</sup>H COSY of auranticanol C (4)  
S20: HMBC of auranticanol C (4)  
S21: ROESY of auranticanol C (4)  
S22: EIMS of auranticanol C (4)  
S23: <sup>1</sup>H NMR of auranticanol D (5)  
S24: DEPT of auranticanol D (5)  
S25: HSQC of auranticanol D (5)  
S26: <sup>1</sup>H-<sup>1</sup>H COSY of auranticanol D (5)  
S27: HMBC of auranticanol D (5)  
S28: ROESY of auranticanol D (5)  
S29: ESIMS of auranticanol D (5)  
S30: <sup>1</sup>H NMR of auranticanol E (6)  
S31: DEPT of auranticanol E (6)  
S32: HSQC of auranticanol E (6)  
S33: <sup>1</sup>H-<sup>1</sup>H COSY of auranticanol E (6)  
S34: HMBC of auranticanol E (6)  
S35: ROESY of auranticanol E (6)  
S36: ESIMS of auranticanol E (6)  
S37: <sup>1</sup>H NMR of auranticanol F (7)  
S38: DEPT of auranticanol F (7)  
S39: HSQC of auranticanol F (7)  
S40: <sup>1</sup>H-<sup>1</sup>H COSY of auranticanol F (7)  
S41: HMBC of auranticanol F (7)  
S42: ROESY of auranticanol F (7)  
S43: ESIMS of auranticanol F (7)  
S44: <sup>1</sup>H NMR of auranticanol G (18)  
S45: DEPT of auranticanol G (18)  
S46: HSQC of auranticanol G (18)  
S47: <sup>1</sup>H-<sup>1</sup>H COSY of auranticanol G (18)  
S48: HMBC of auranticanol G (18)  
S49: ROESY of auranticanol G (18)  
S50: ESIMS of auranticanol G (18)  
S51: <sup>1</sup>H NMR of auranticanol H (19)  
S52: DEPT of auranticanol H (19)  
S53: HSQC of auranticanol H (19)  
S54: <sup>1</sup>H-<sup>1</sup>H COSY of auranticanol H (19)  
S55: HMBC of auranticanol H (19)  
S56: ROESY of auranticanol H (19)  
S57: ESIMS of auranticanol H (19)  
S58: <sup>1</sup>H NMR of auranticanol I (20)  
S59: DEPT of auranticanol I (20)  
S60: HSQC of auranticanol I (20)  
S61: <sup>1</sup>H-<sup>1</sup>H COSY of auranticanol I (20)  
S62: HMBC of auranticanol I (20)  
S63: ROESY of auranticanol I (20)  
S64: ESIMS of auranticanol I (20)  
S65: <sup>1</sup>H NMR of auranticanol J (21)  
S66: DEPT of auranticanol J (21)  
S67: HSQC of auranticanol J (21)  
S68: <sup>1</sup>H-<sup>1</sup>H COSY of auranticanol J (21)  
S69: HMBC of auranticanol J (21)  
S70: ROESY of auranticanol J (21)  
S71: ESIMS of auranticanol J (21)  
S73: <sup>1</sup>H NMR of auranticanol K (22)  
S74: DEPT of auranticanol K (22)  
S75: HSQC of auranticanol K (22)  
S76: <sup>1</sup>H-<sup>1</sup>H COSY of auranticanol K (22)  
S77: HMBC of auranticanol K (22)  
S78: ROESY of auranticanol K (22)  
S79: ESIMS of auranticanol K (22)  
S80: <sup>1</sup>H NMR of auranticanol L (23)  
S81: DEPT of auranticanol L (23)  
S82: HSQC of auranticanol L (23)  
S83: <sup>1</sup>H-<sup>1</sup>H COSY of auranticanol L (23)  
S84: HMBC of auranticanol L (23)  
S85: ROESY of auranticanol L (23)  
S86: ESIMS of auranticanol L (23)  
S87: <sup>1</sup>H NMR of auranticanol M (24)  
S88: DEPT of auranticanol M (24)  
S89: HSQC of auranticanol M (24)  
S90: <sup>1</sup>H-<sup>1</sup>H COSY of auranticanol M (24)  
S91: HMBC of auranticanol M (24)  
S92: ROESY of auranticanol M (24)  
S93: ESIMS of auranticanol M (24)

S1: Figure 2 and 3

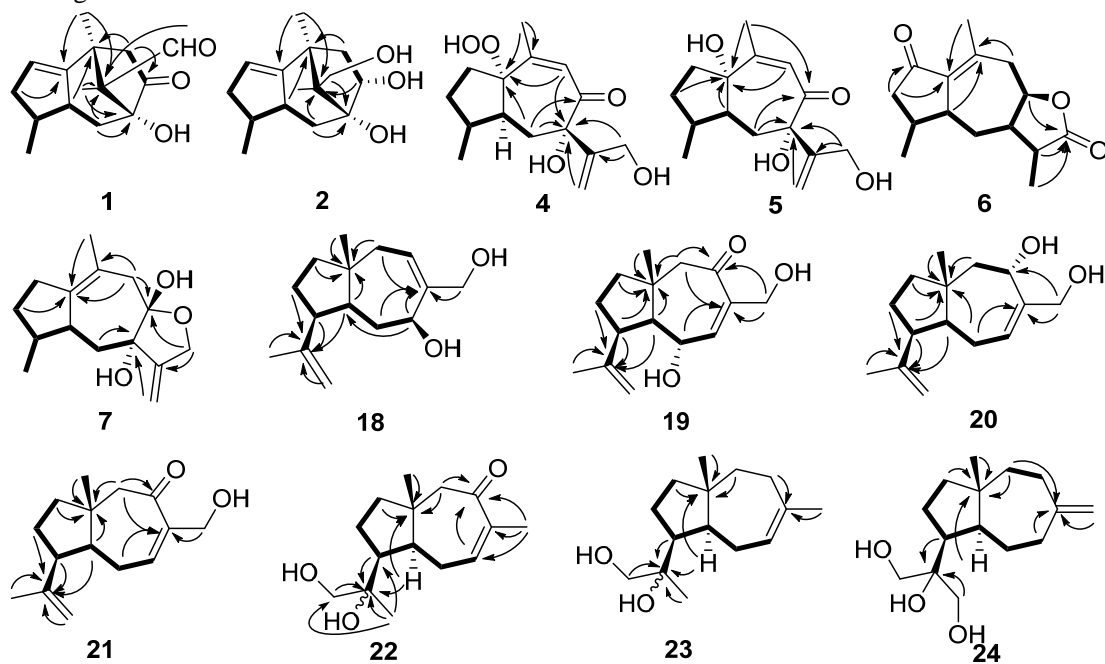

Fig. 2.  $^{13}\text{C}$ - $^{13}\text{C}$  COSY (—) and HMBC (H $\rightarrow$ C) Key correlations of 1, 2, 4-7, and 18-24

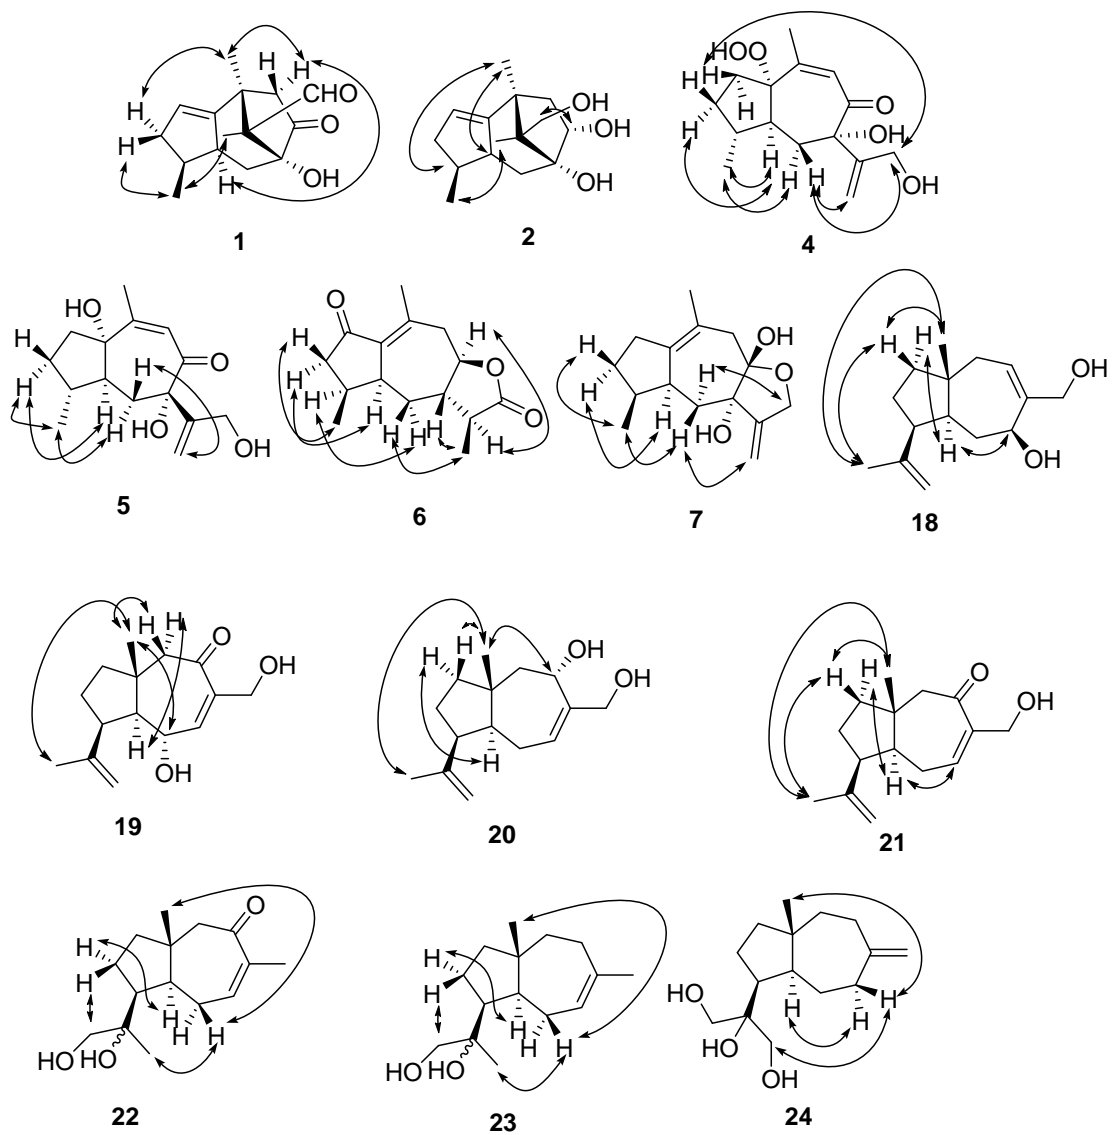

Fig. 3 . Key ROESY correlations of 1, 2, 4-7, and 18-24.

### S2: <sup>1</sup>H NMR of auranticanol A (1)

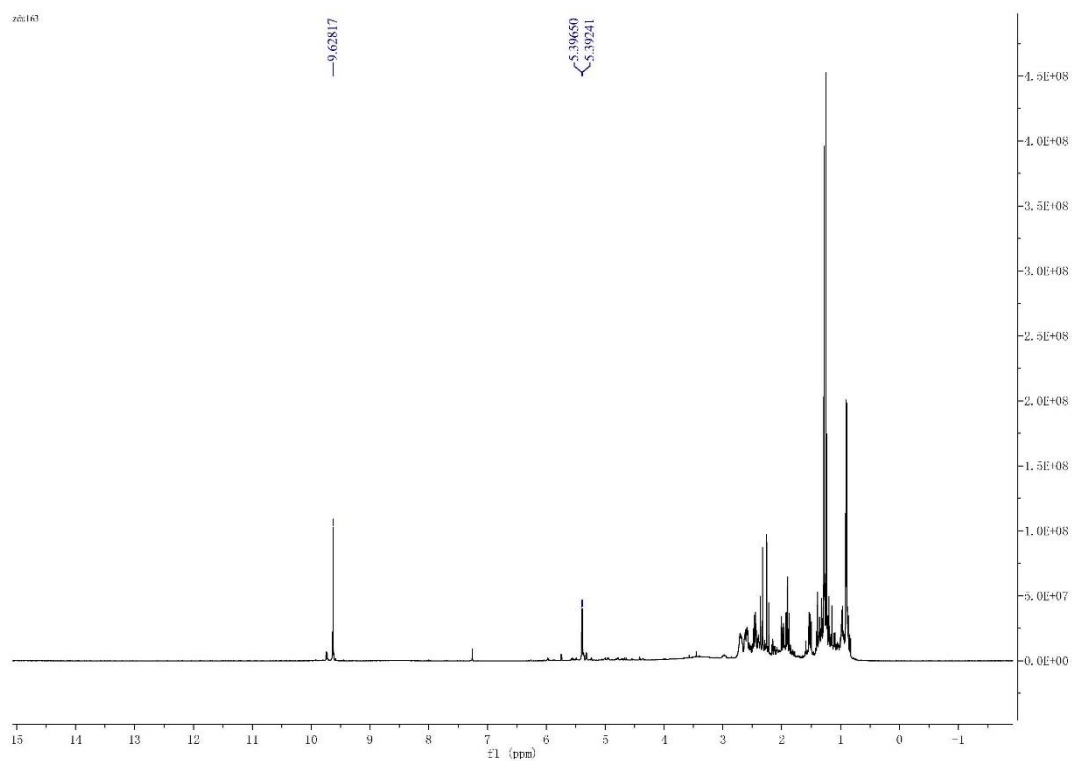

### S3: DEPT of auranticanol A (1)

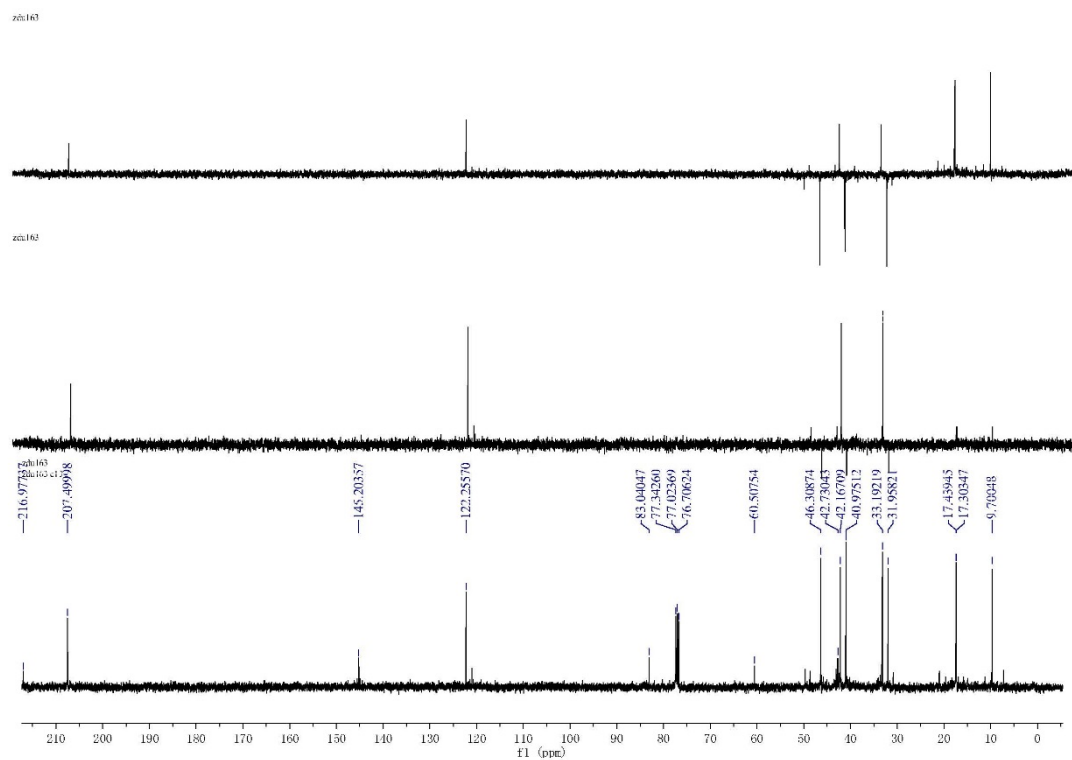

S4: HSQC of auranticanol A (1)

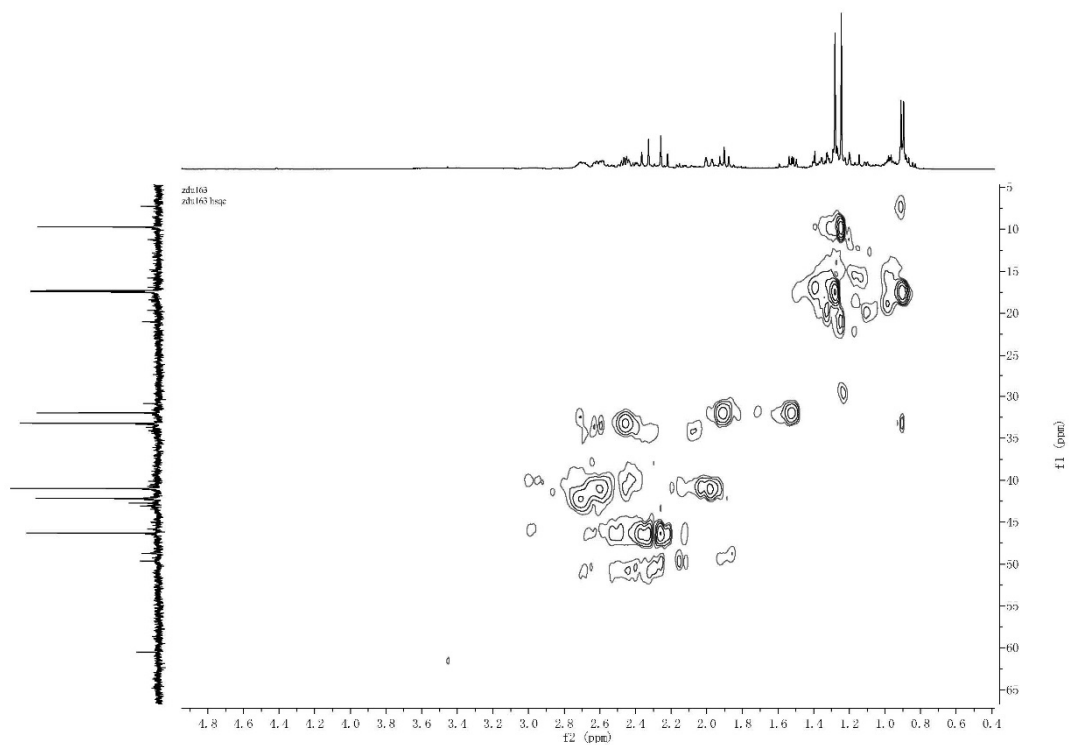

S5:  $^1\text{H}$ - $^1\text{H}$  COSY of auranticanol A (1)

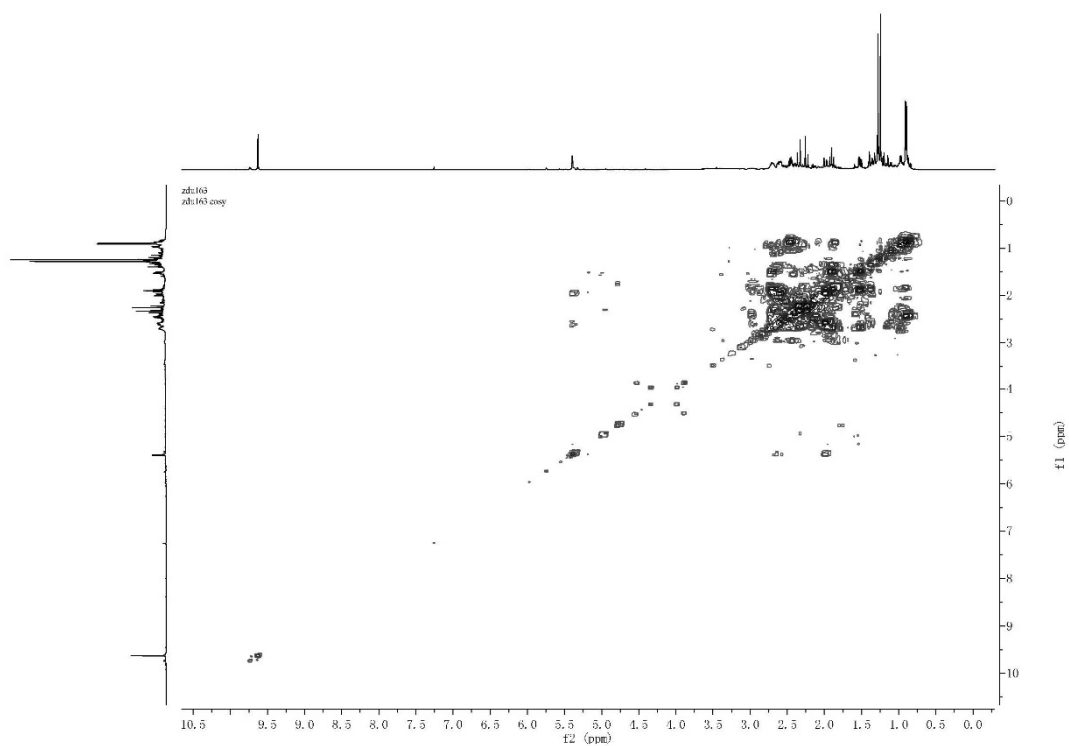

S6: HMBC of auranticanol A (1)

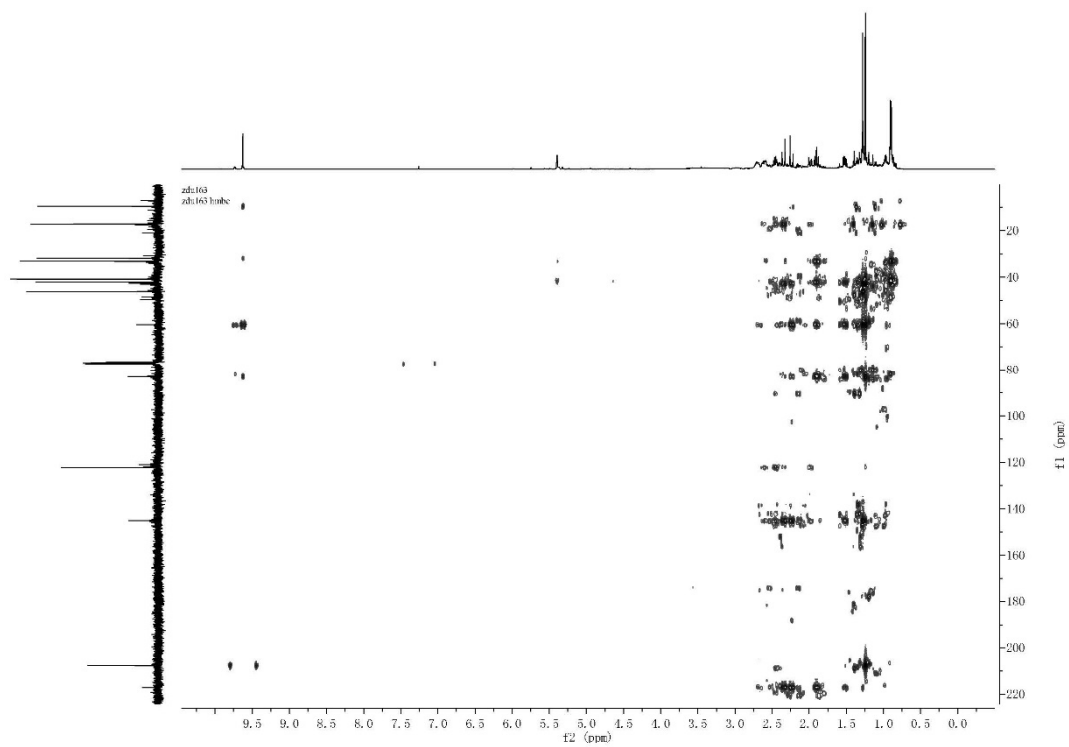

S7: ROESY of auranticanol A (1)

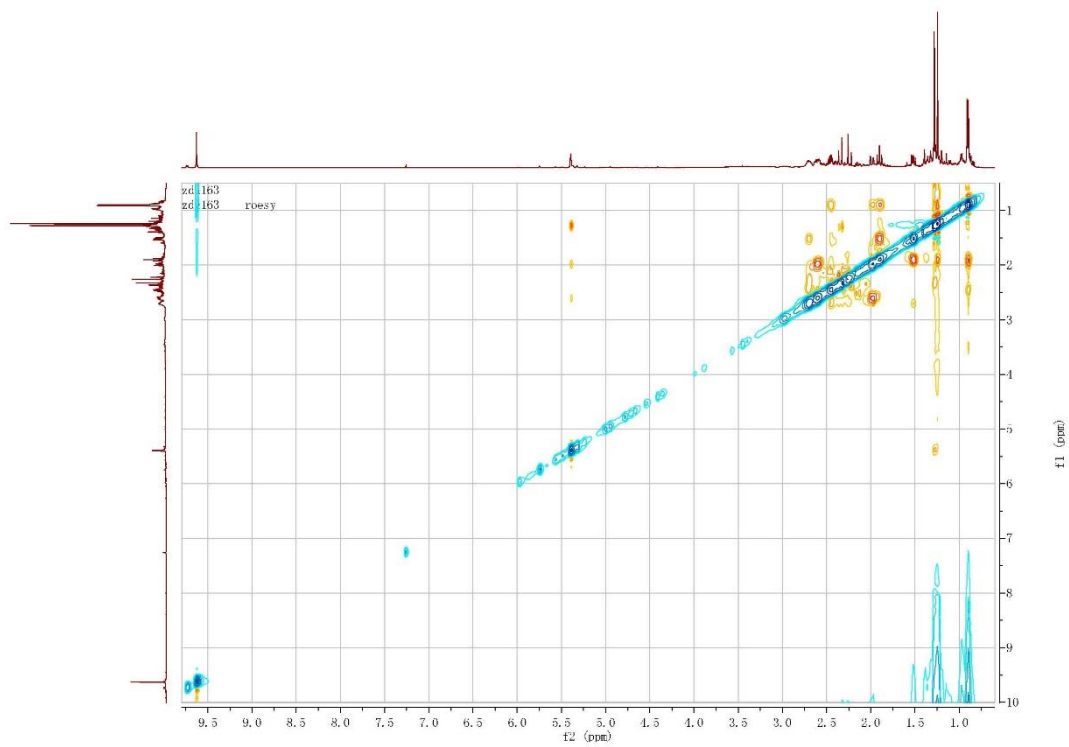





S10: DEPT of auranticanol B (2)

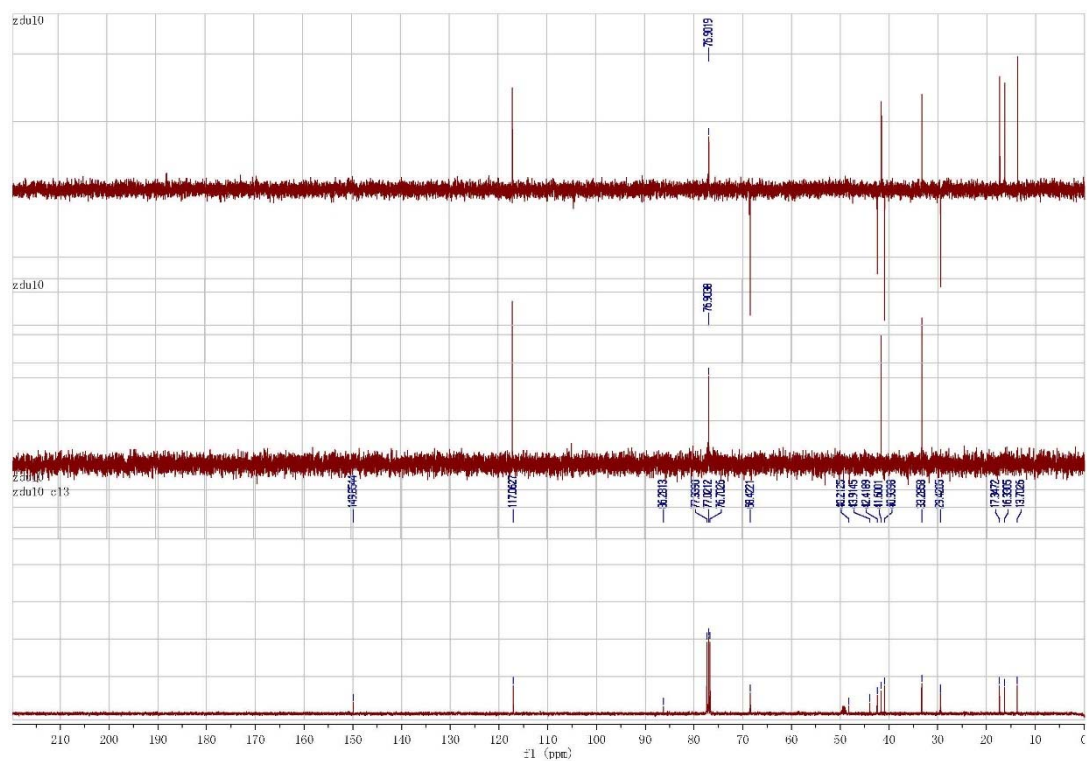

S11: HSQC of auranticanol B (2)

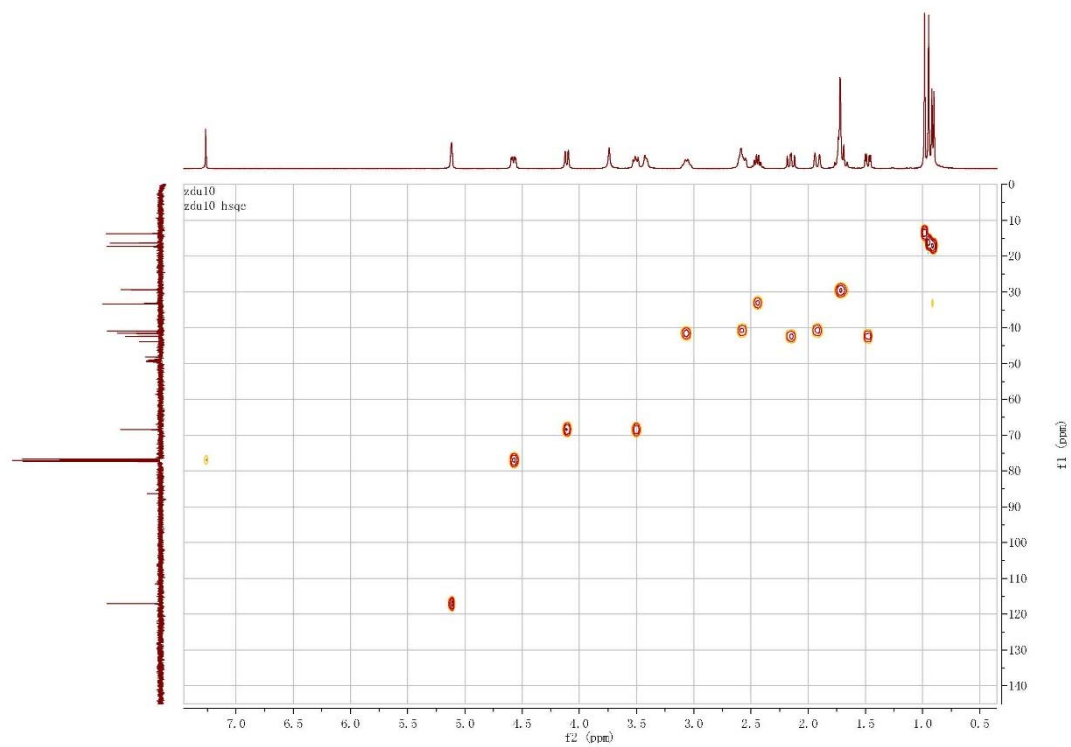

S12:  $^1\text{H}$ - $^1\text{H}$  COSY of auranticanol B (2)

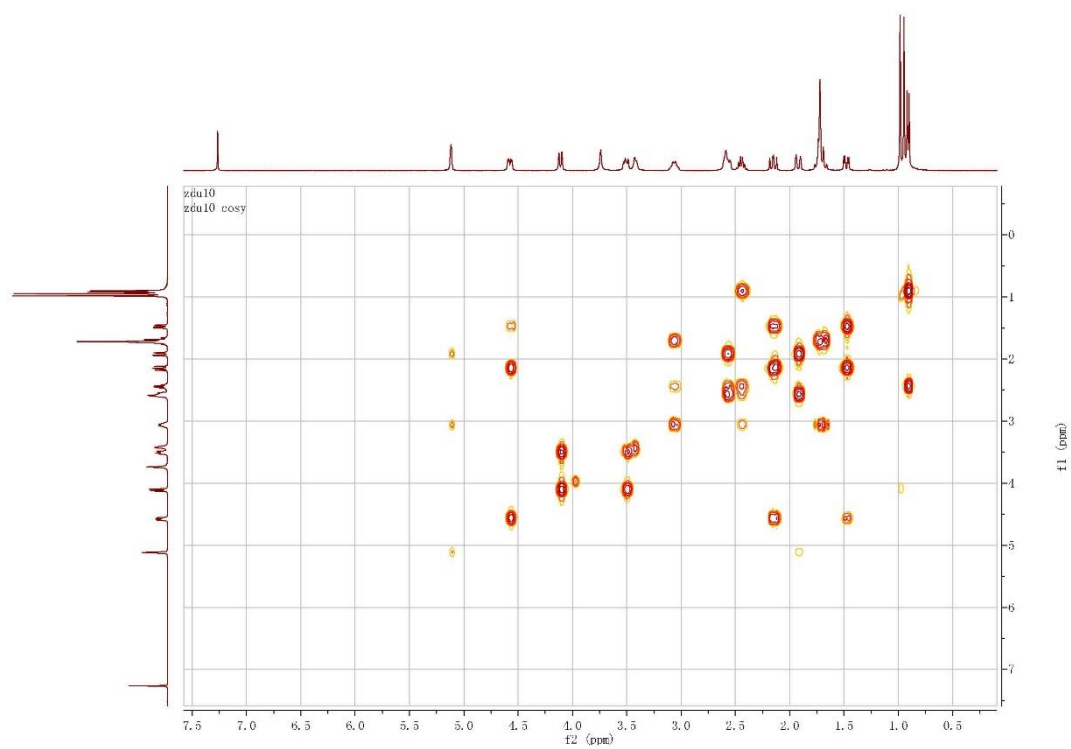

S13: HMBC of auranticanol B (2)

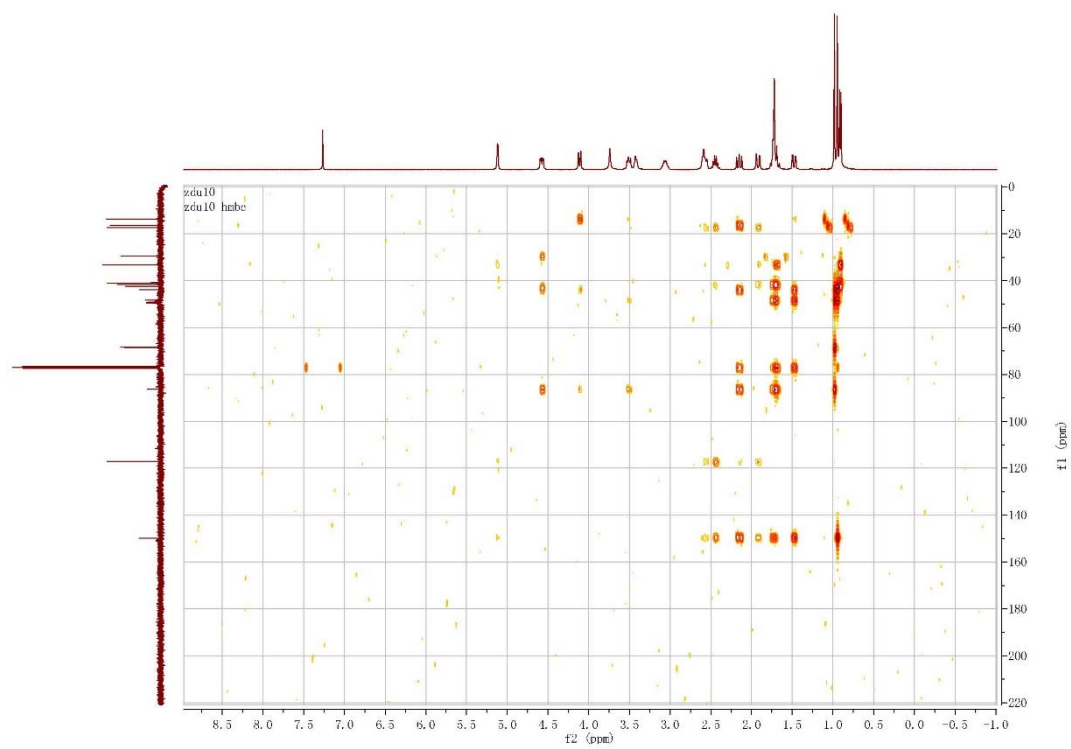

S14: ROESY of auranticanol B (2)

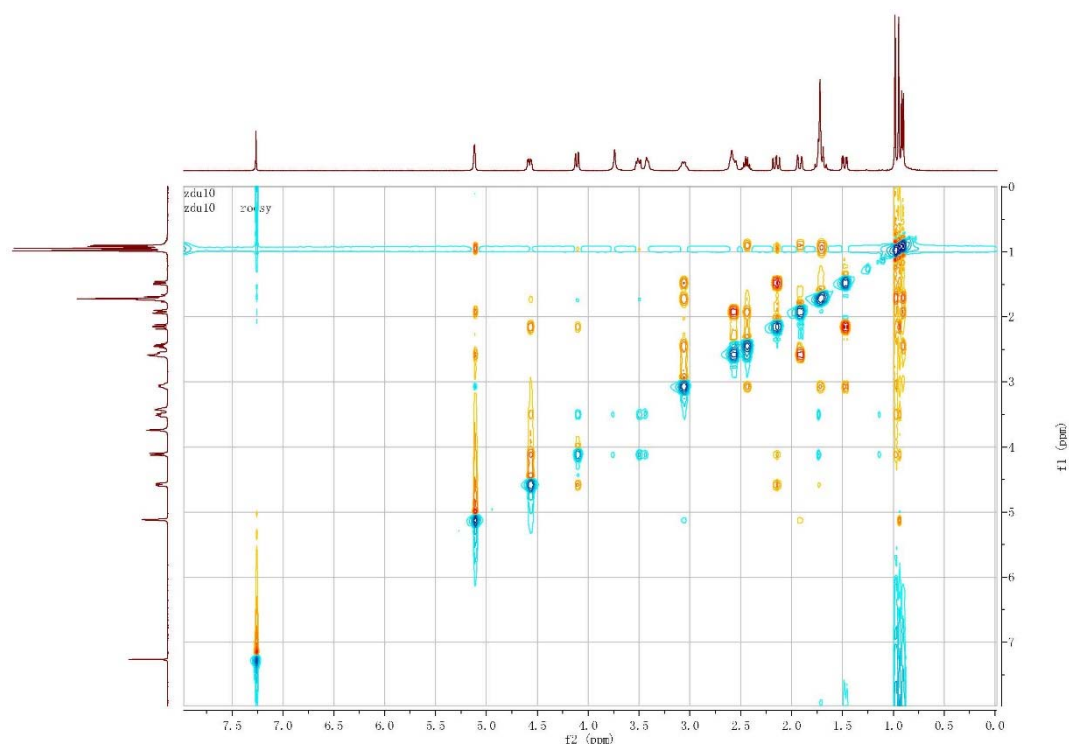

S15: ESIMS of auranticanol B (2)

| Mass Spectrum List Report    |                                          |              |                                        |                          |         |
|------------------------------|------------------------------------------|--------------|----------------------------------------|--------------------------|---------|
| <b>Analysis Info</b>         |                                          |              | Acquisition Date 7/21/2011 11:19:29 AM |                          |         |
| Analysis Name                | D:\DATA\2011file\1107\110721\Zdu-10000.d |              | Operator                               | BDAL                     |         |
| Method                       | ms_ptservice.m                           |              | Instrument                             | HCT                      |         |
| Sample Name                  | Zdu-10                                   |              |                                        |                          |         |
| <b>Acquisition Parameter</b> |                                          |              |                                        |                          |         |
| Ion Source Type              | ESI                                      | Ion Polarity | Positive                               | Alternating Ion Polarity | off     |
| Mass Range Mode              | Sid/Enhanced                             | Scan Begin   | 100 m/z                                | Scan End                 | 700 m/z |
| Capillary Exit               | 160.0 Volt                               | Skimmer      | 40.0 Volt                              | Trap Drive               | 42.7    |
| Accumulation Time            | 200 µs                                   | Averages     | 7 Spectra                              | Auto MS/MS               | off     |

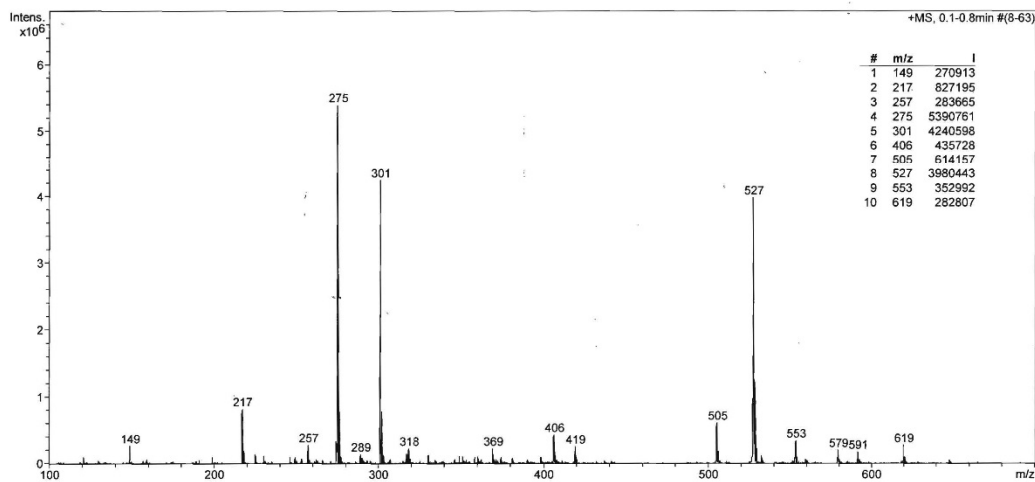

S16: <sup>1</sup>H NMR of auranticanol C (4)

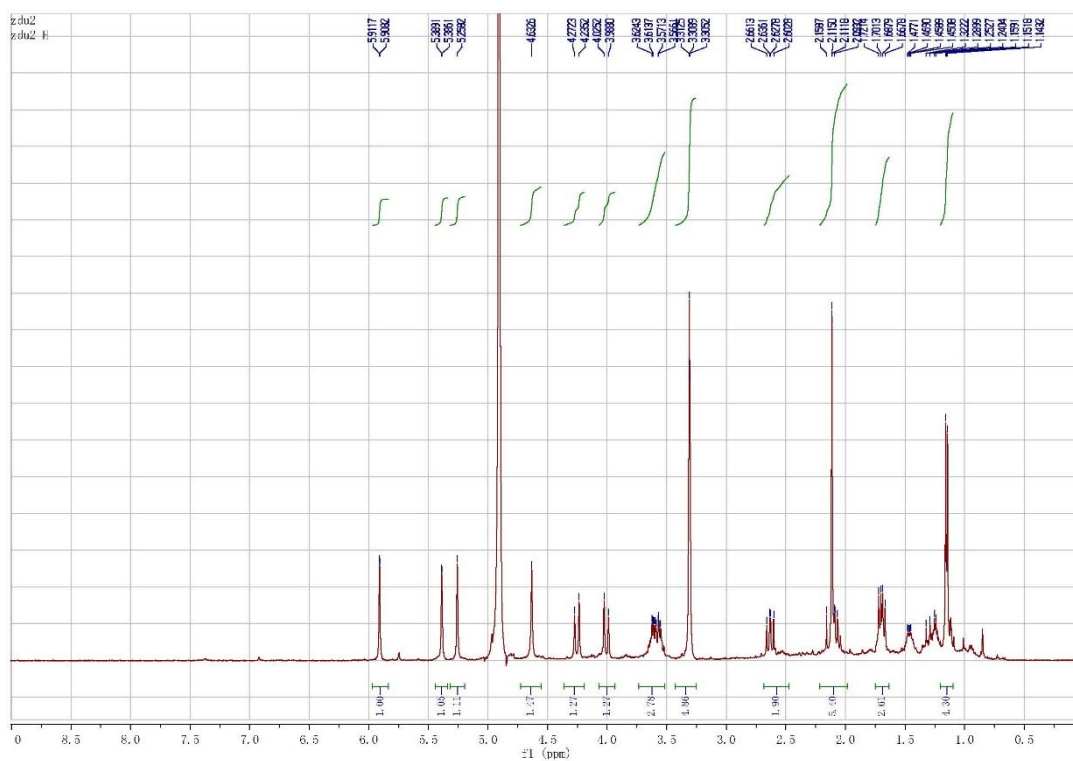

S17: DEPT of auranticanol C (4)

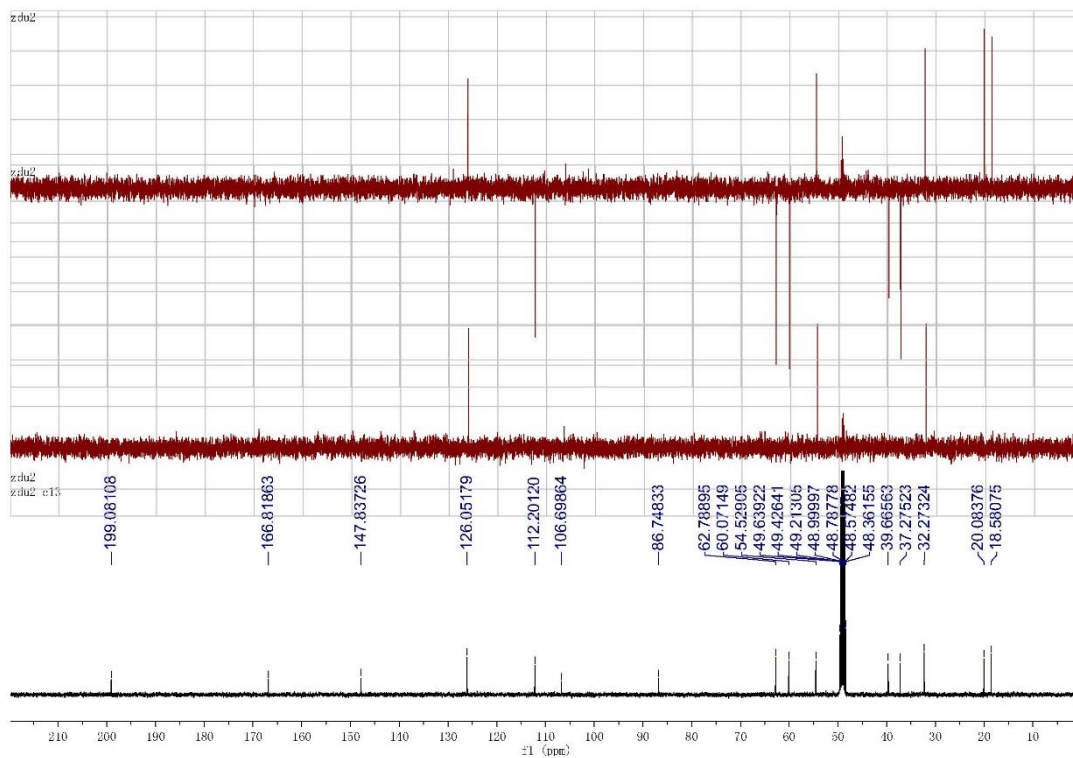

S18: HSQC of auranticanol C (4)

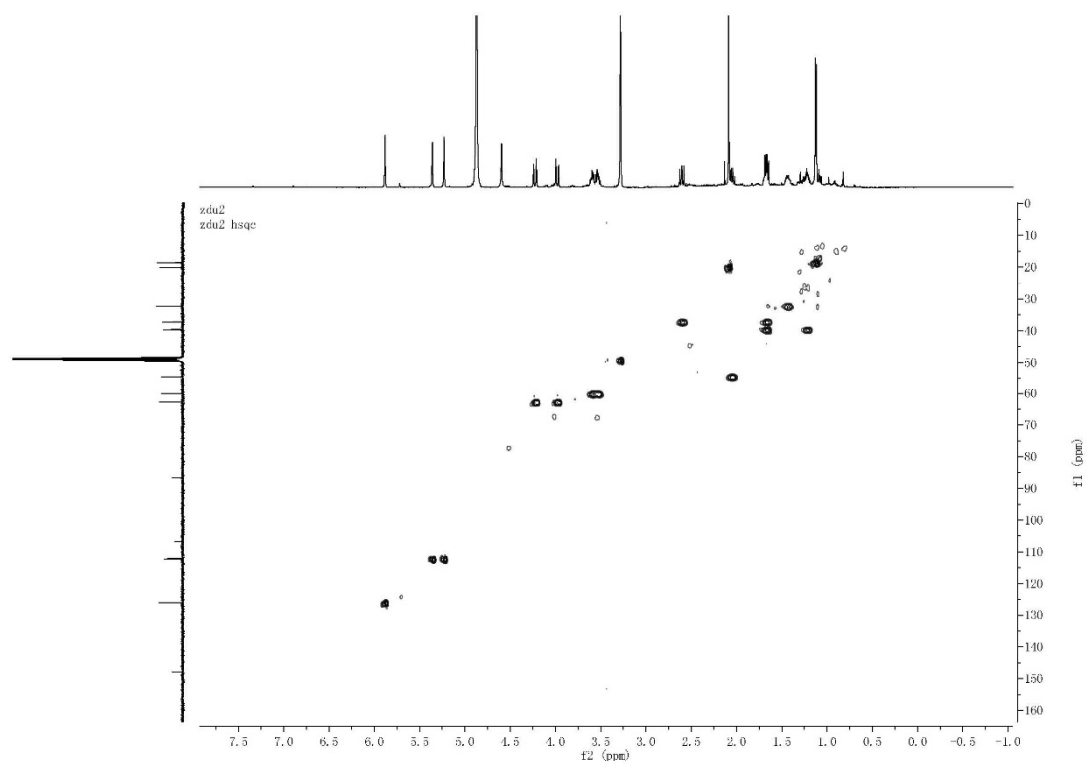

S19:  $^1\text{H}$ - $^1\text{H}$  COSY of auranticanol C (4)

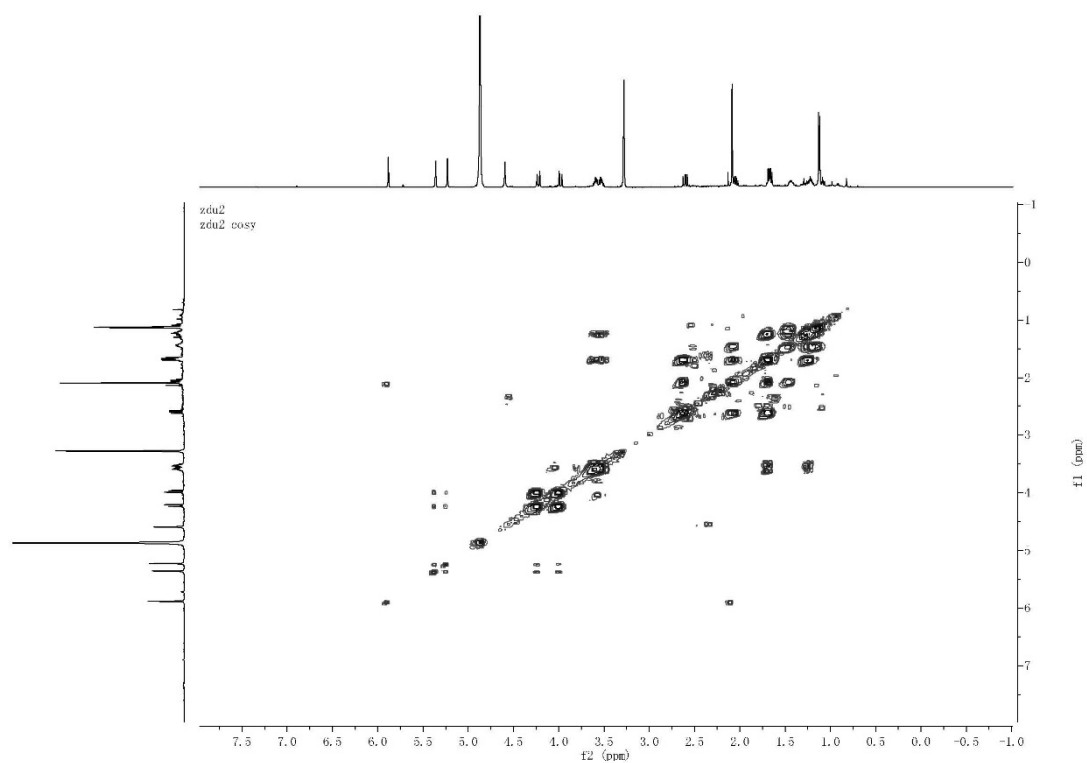

S20: HMBC of auranticanol C (4)

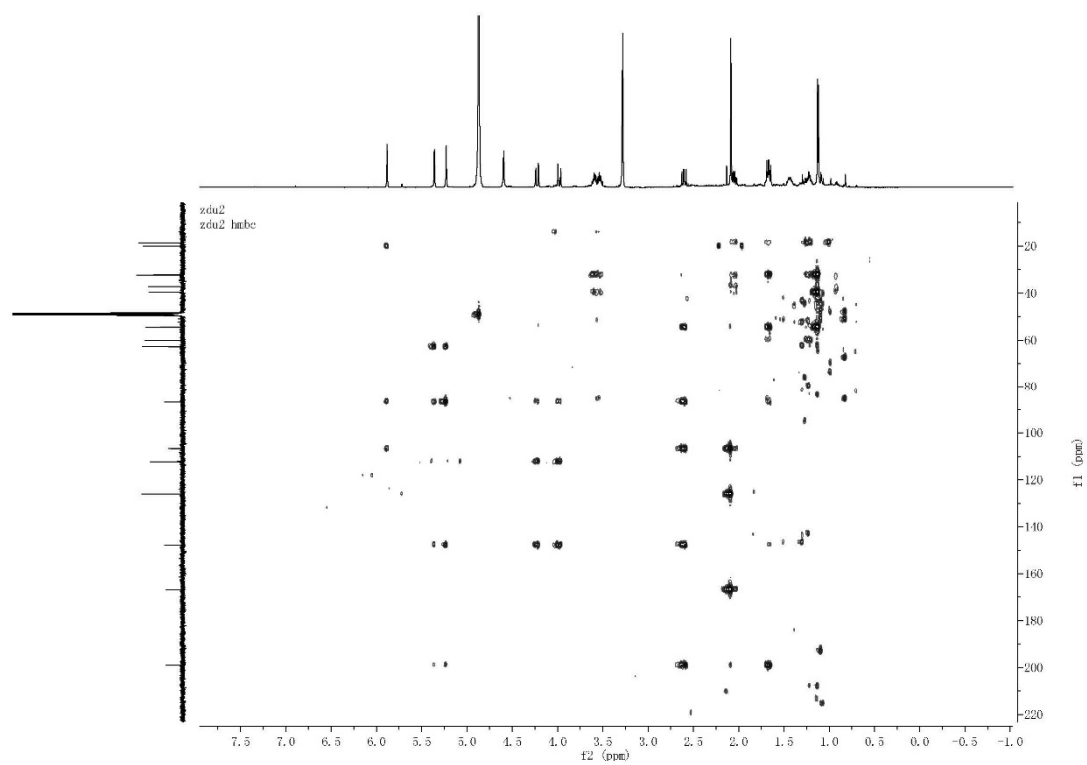

S21: ROESY of auranticanol C (4)

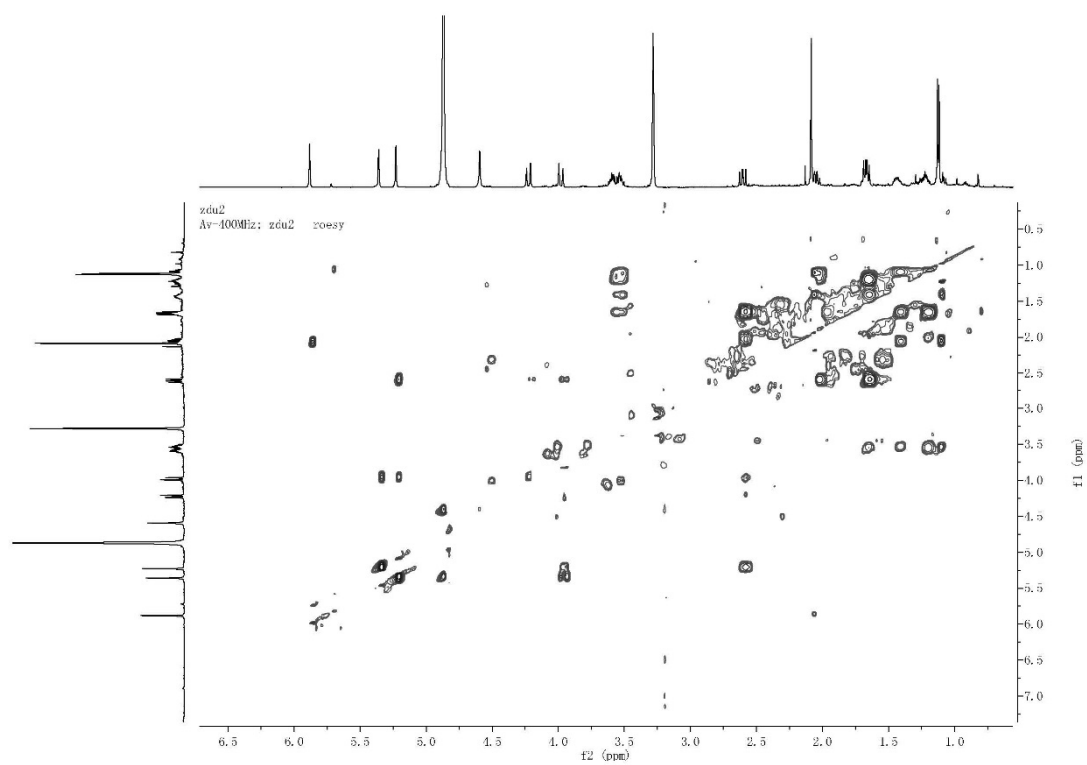

### S22: EIMS of auranticanol C (4)

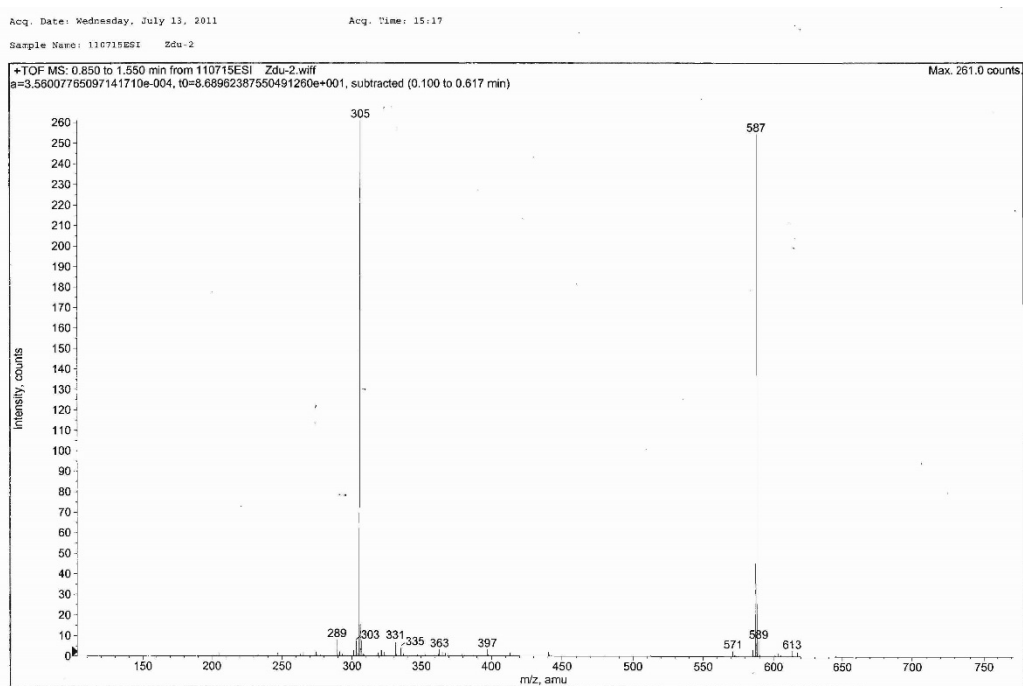

### S23: <sup>1</sup>H NMR of auranticanol D (5)

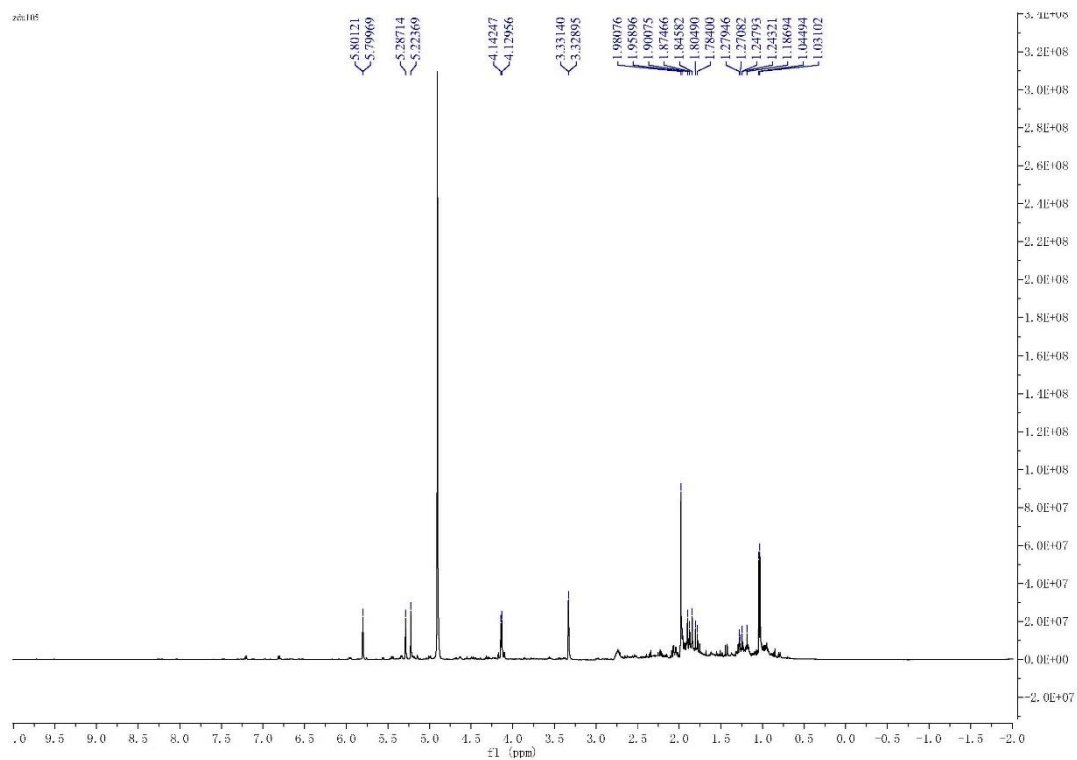

### S24: DEPT of auranticanol D (5)

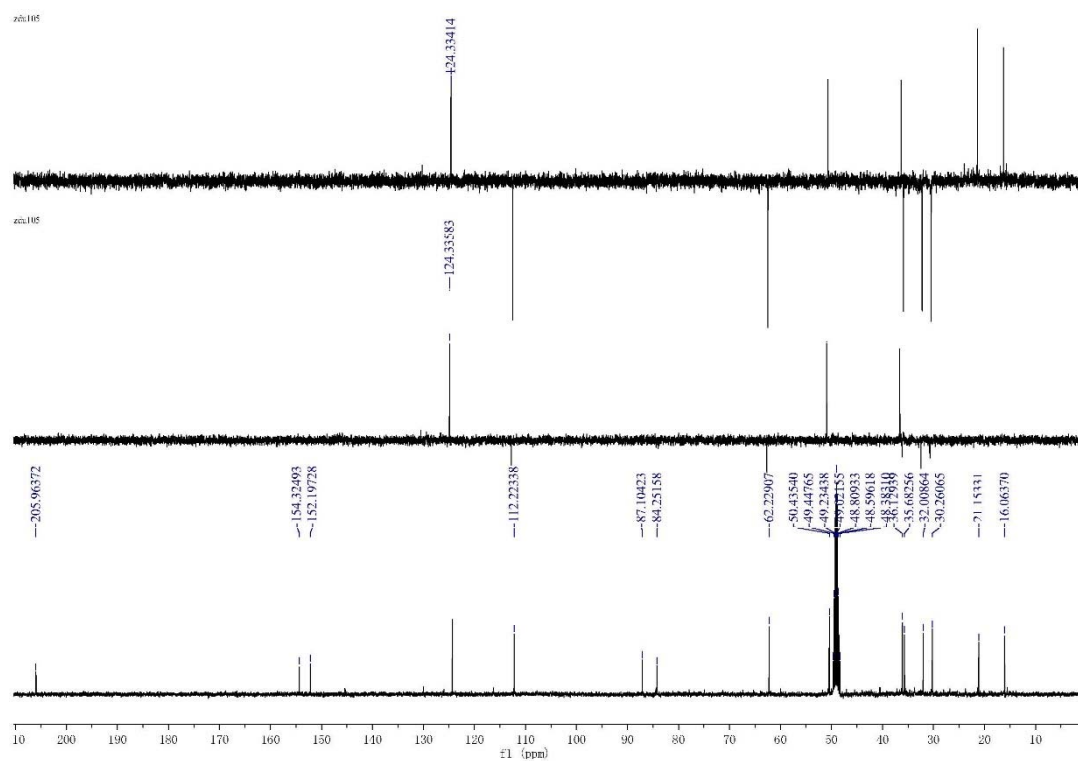

### S25: HSQC of auranticanol D (5)

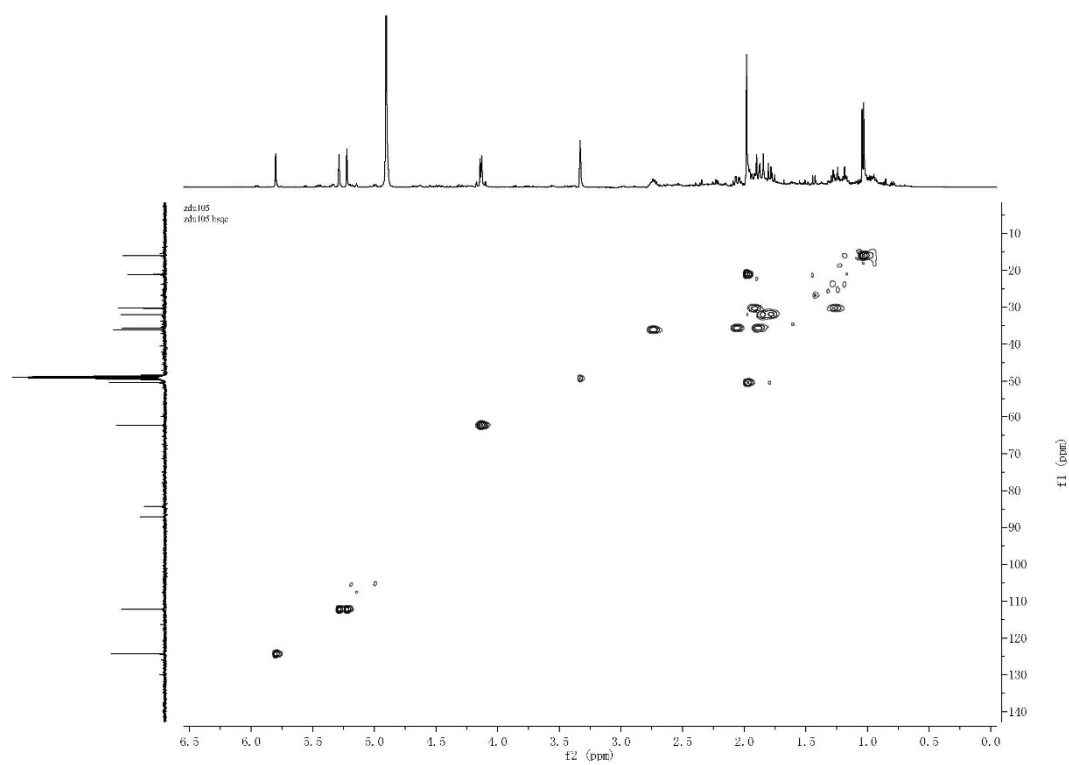



S26:  $^1\text{H}$ - $^1\text{H}$  COSY of auranticanol D (5)

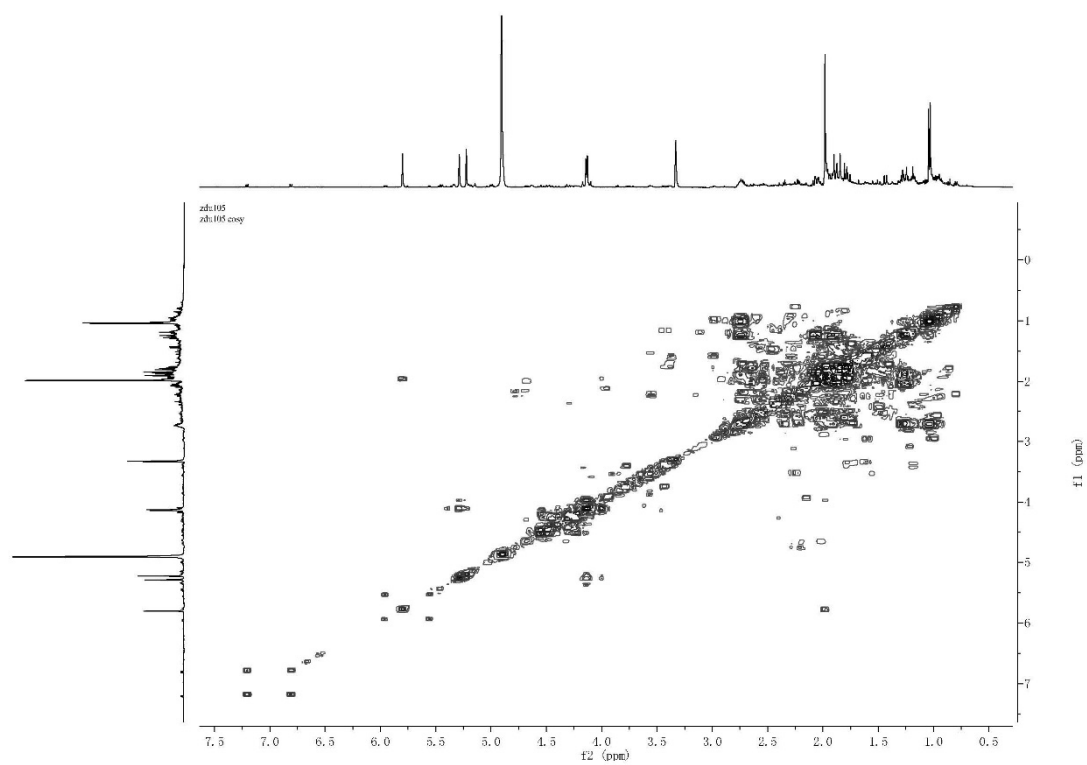

S27: HMBC of auranticanol D (5)

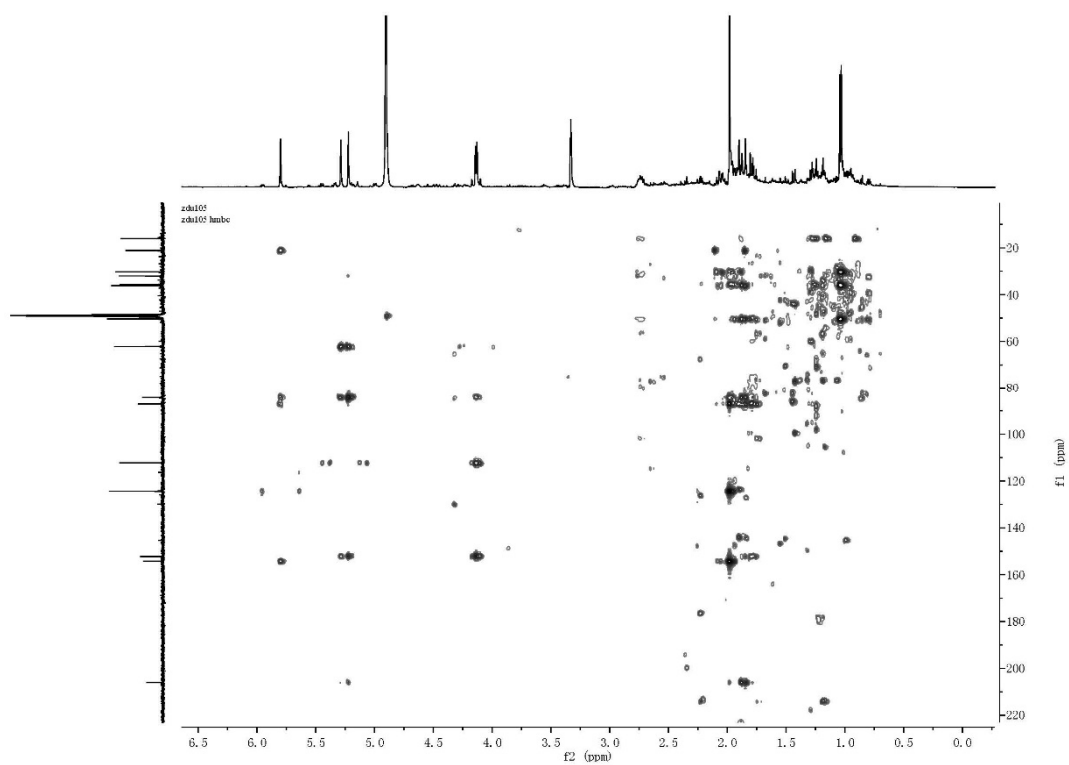

S28: ROESY of auranticanol D (5)

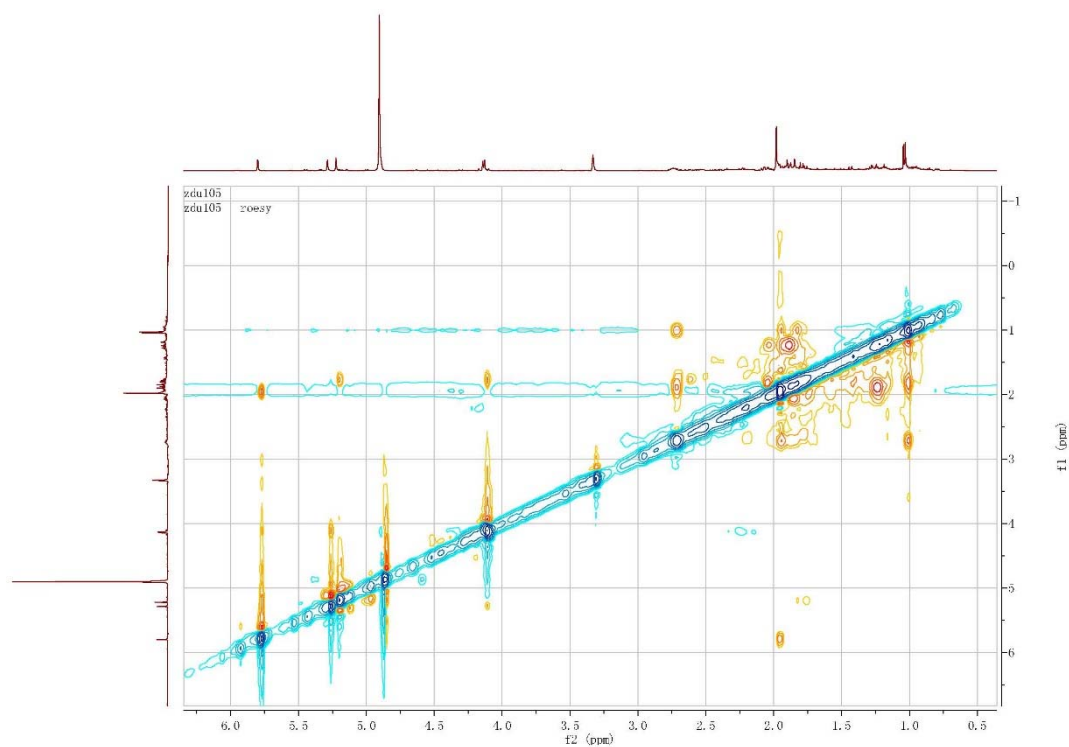

S29: ESIMS of auranticanol D (5)

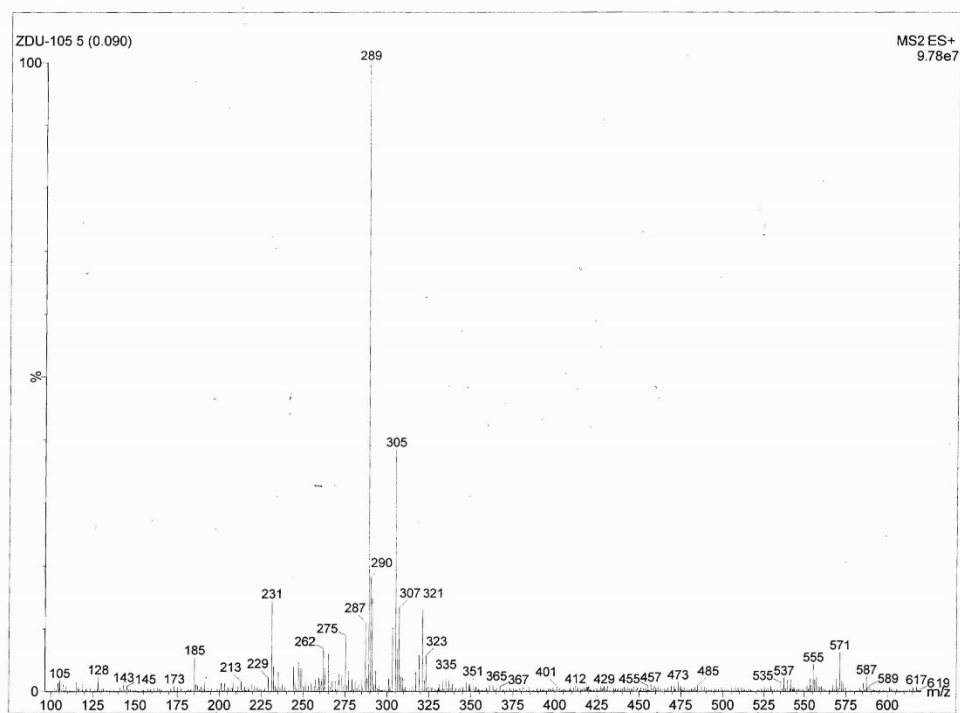



S32: HSQC of auranticanol E (6)

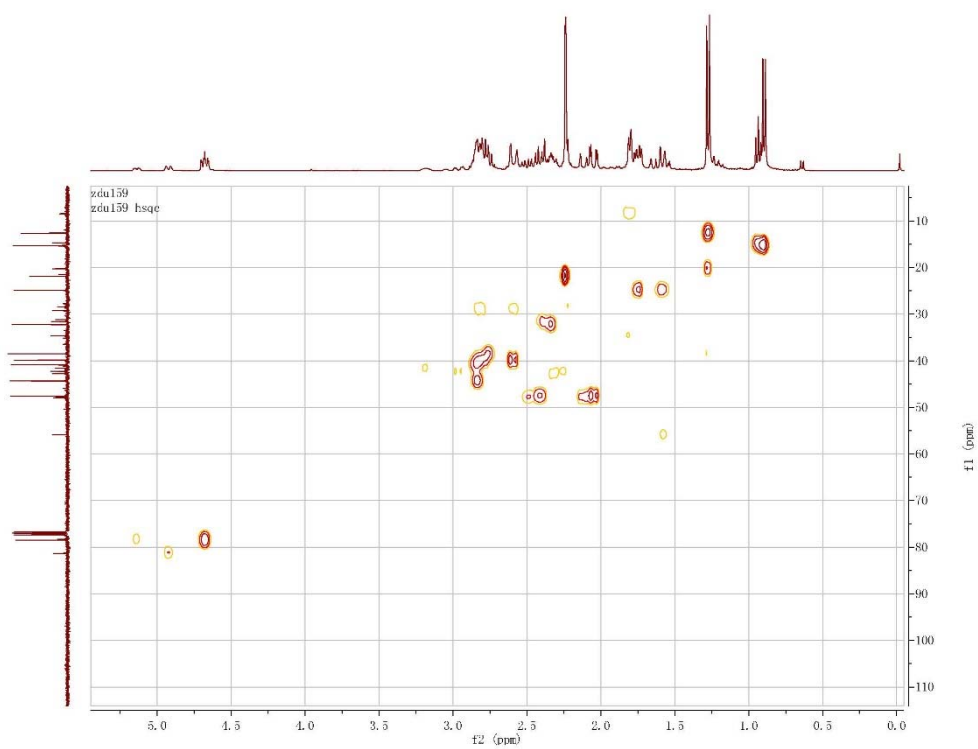

S33:  $^1\text{H}$ - $^1\text{H}$  COSY of auranticanol E (6)

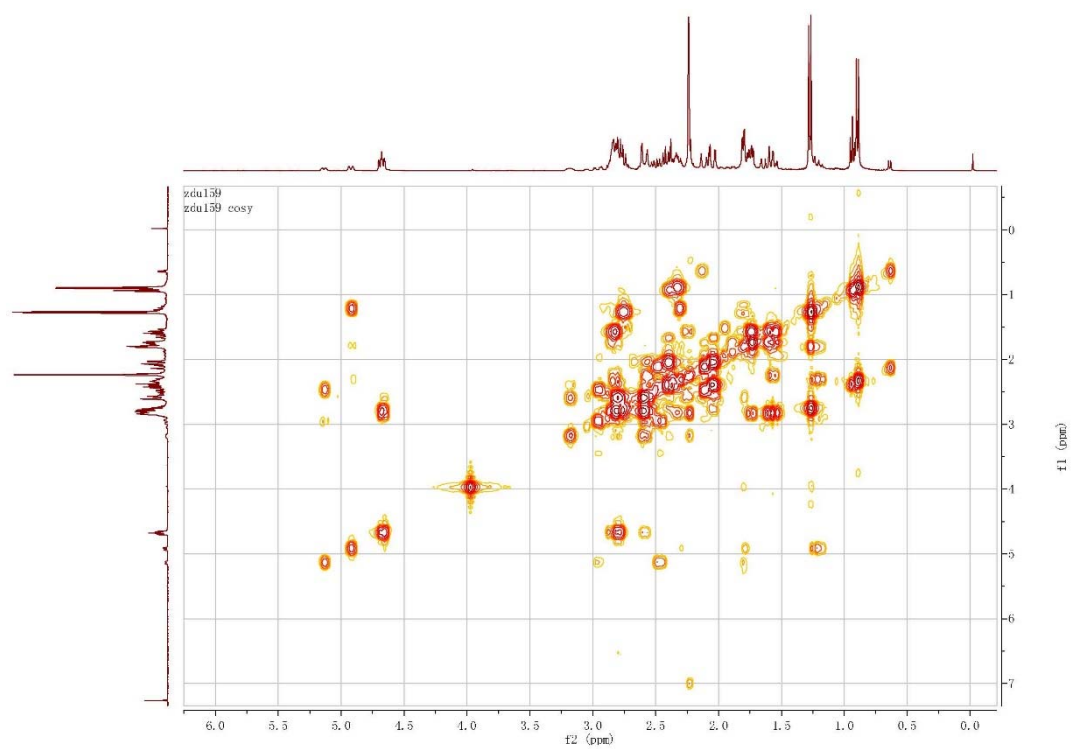

S34: HMBC of auranticanol E (6)

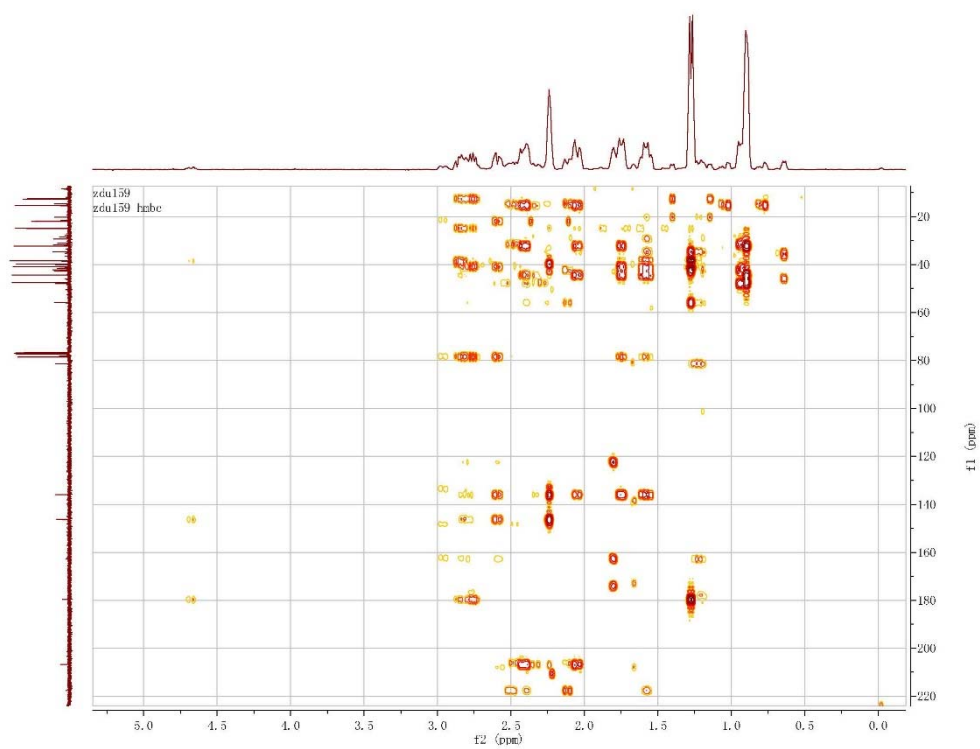

S35: ROESY of auranticanol E (6)

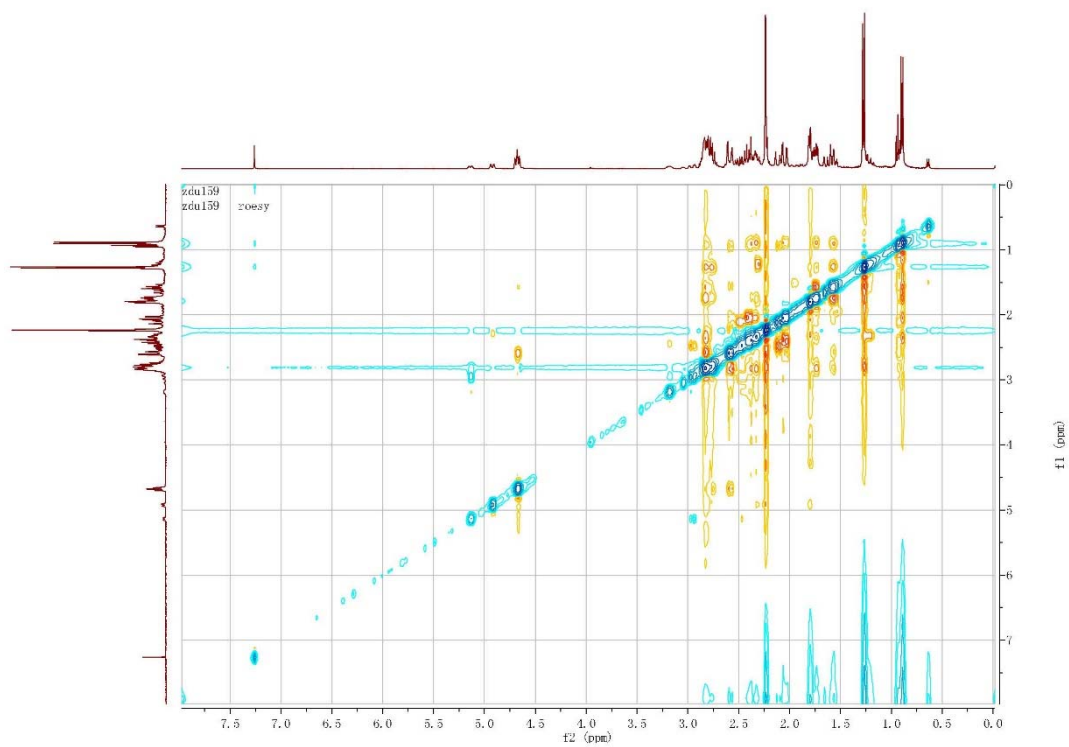

S36: ESIMS of auranticanol E (6)

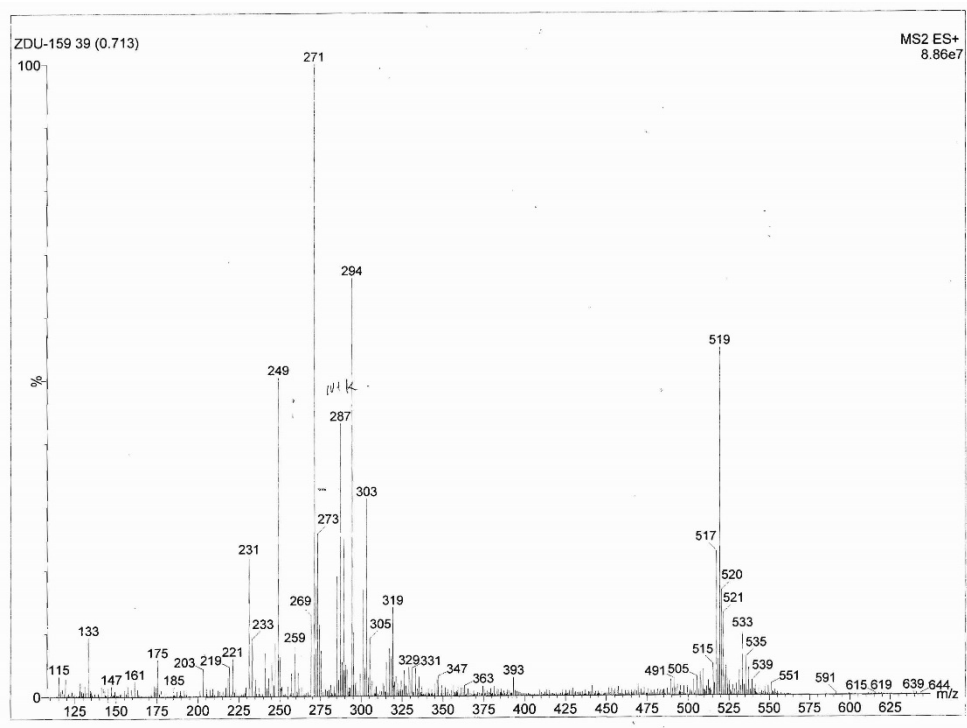

S37: <sup>1</sup>H NMR of auranticanol F (7)

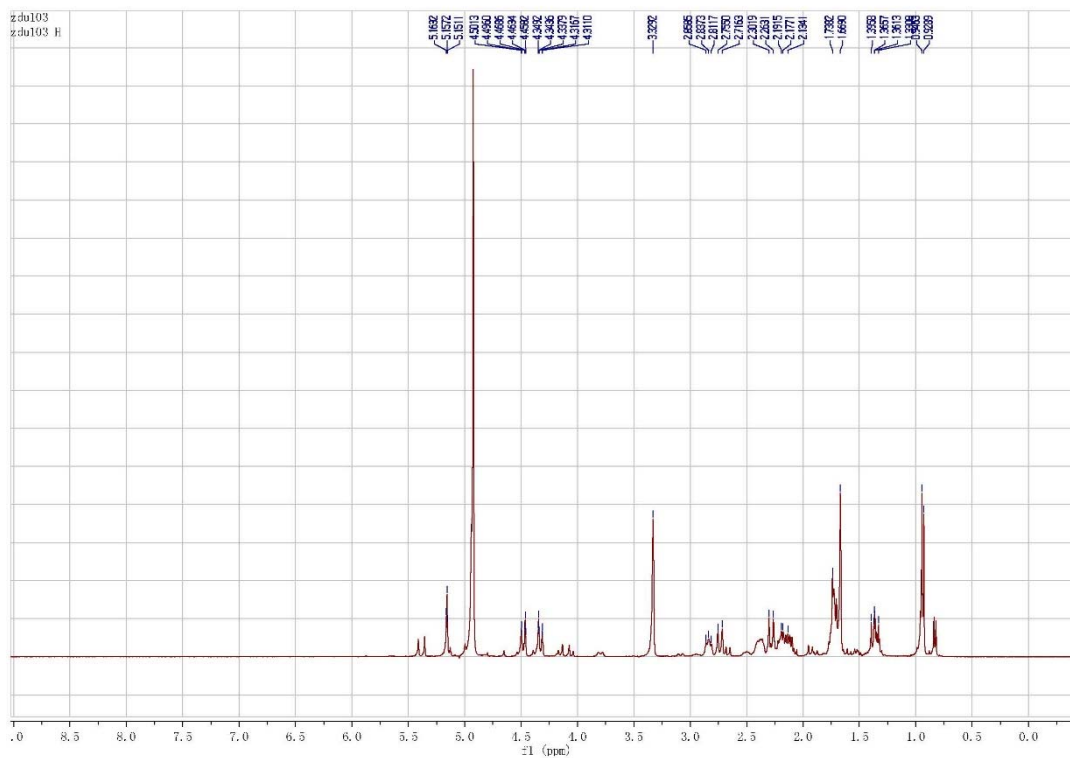

S38: DEPT of auranticanol F (7)

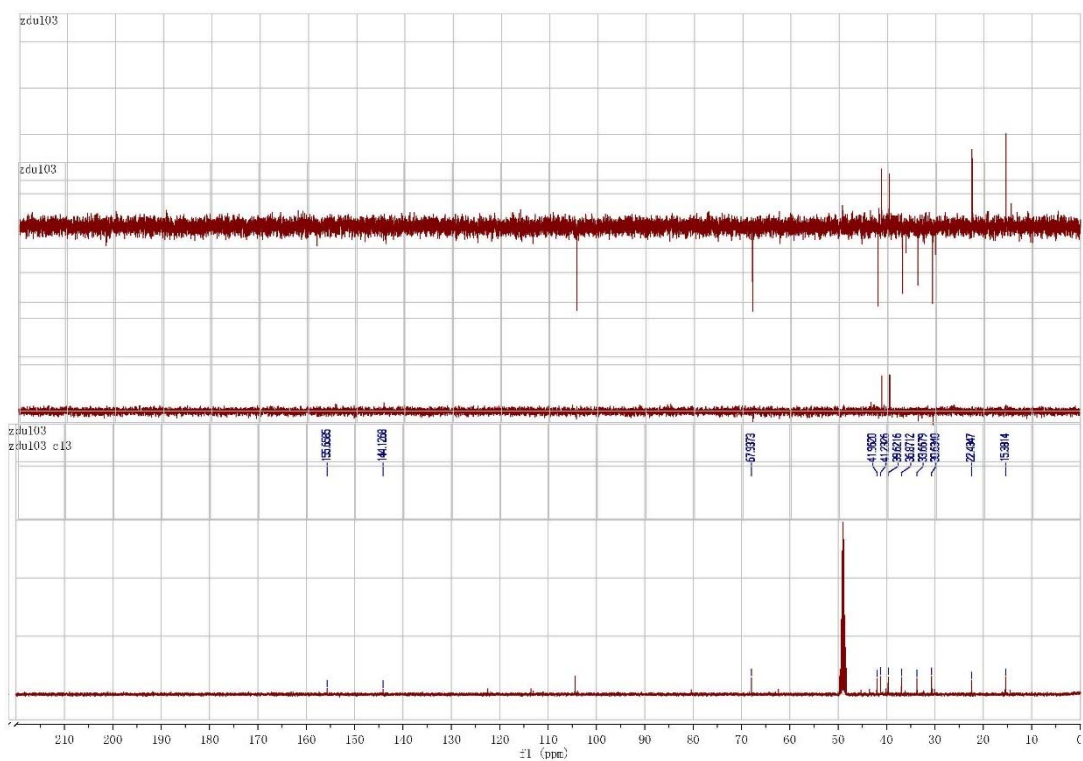

S39: HSQC of auranticanol F (7)

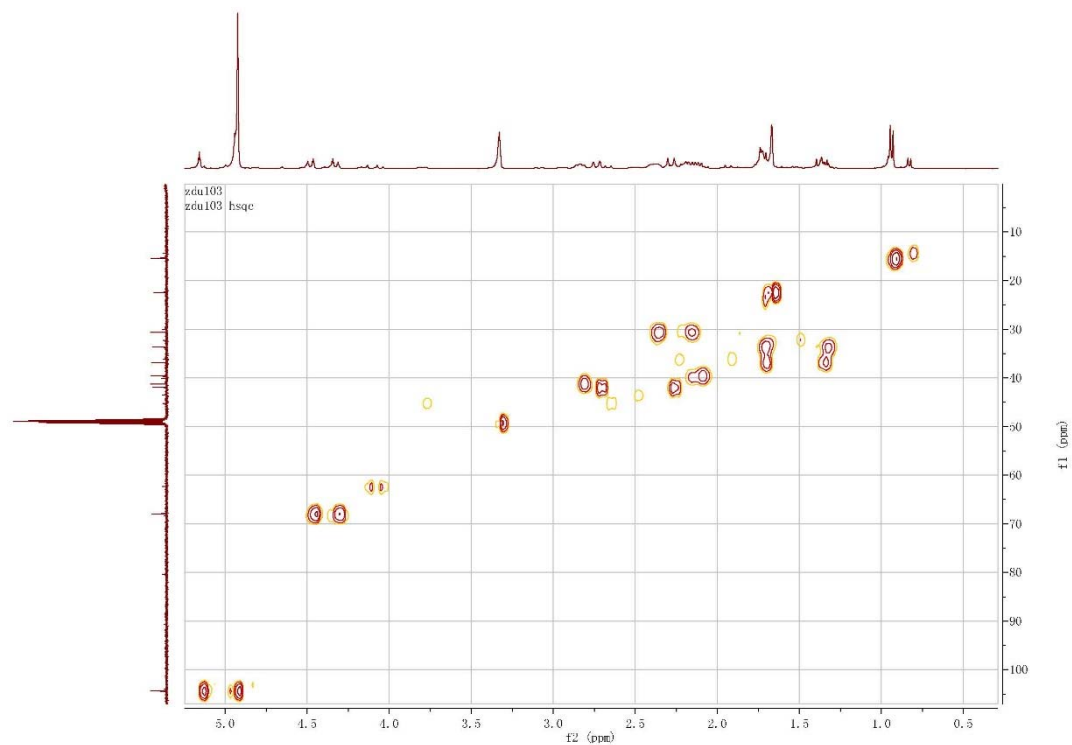

S40:  $^1\text{H}$ - $^1\text{H}$  COSY of auranticanol F (7)

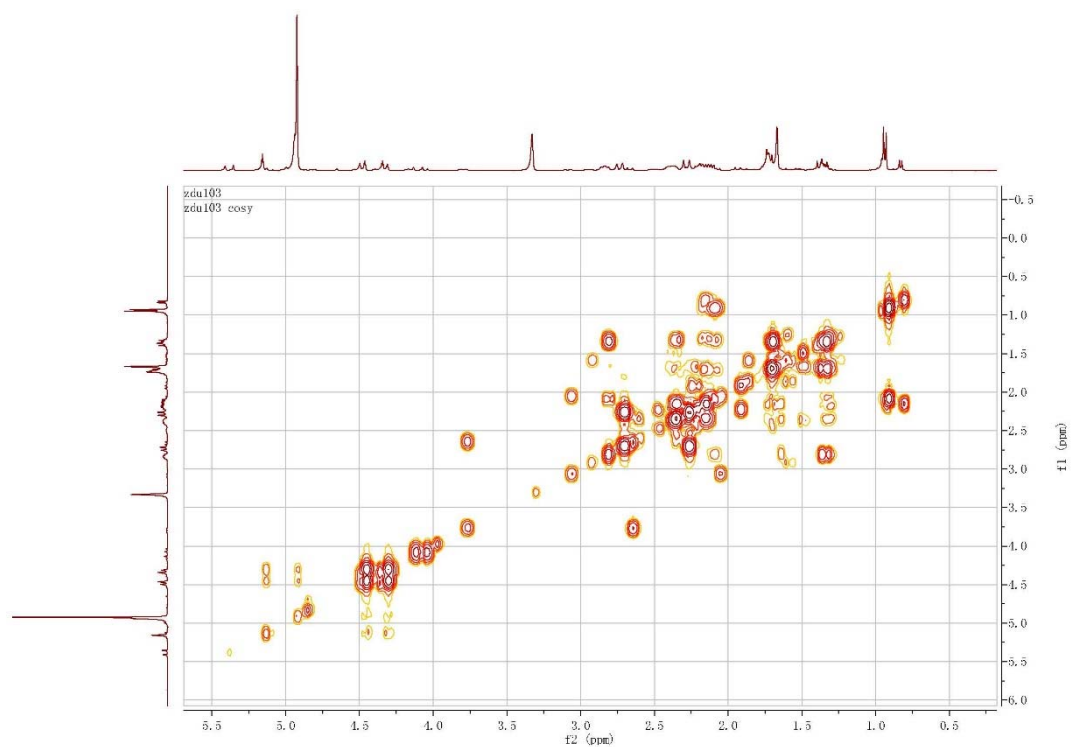

S41: HMBC of auranticanol F (7)

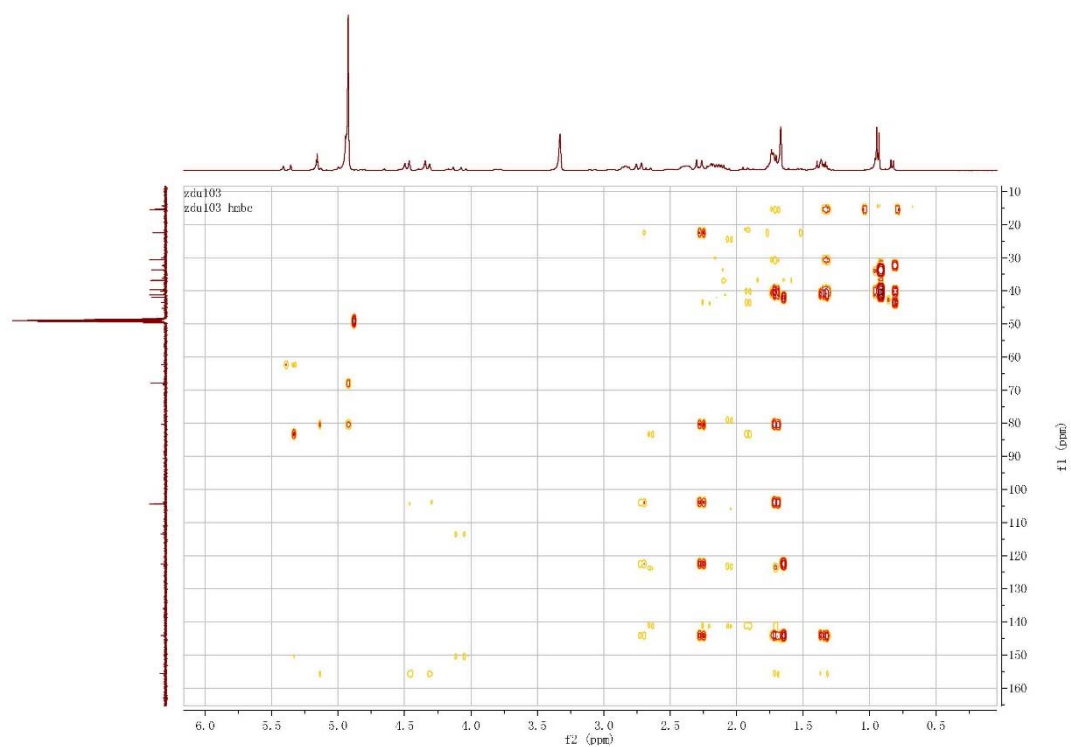



S42: ROESY of auranticanol F (7)

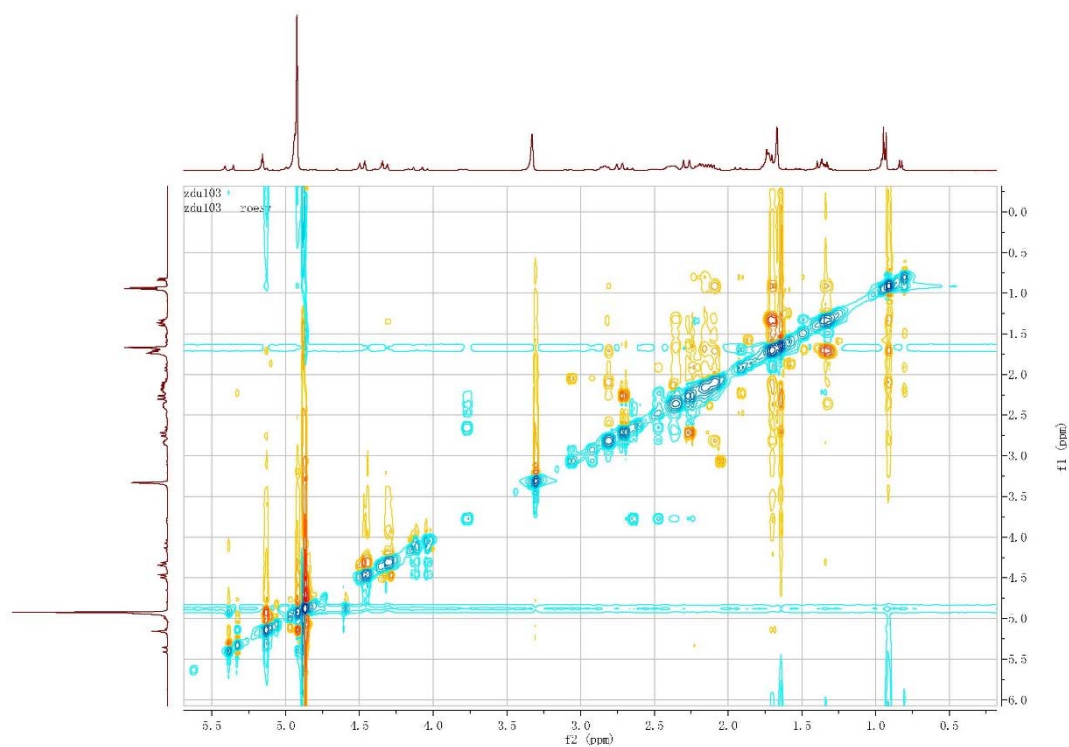

S43: ESIMS of auranticanol F (7)

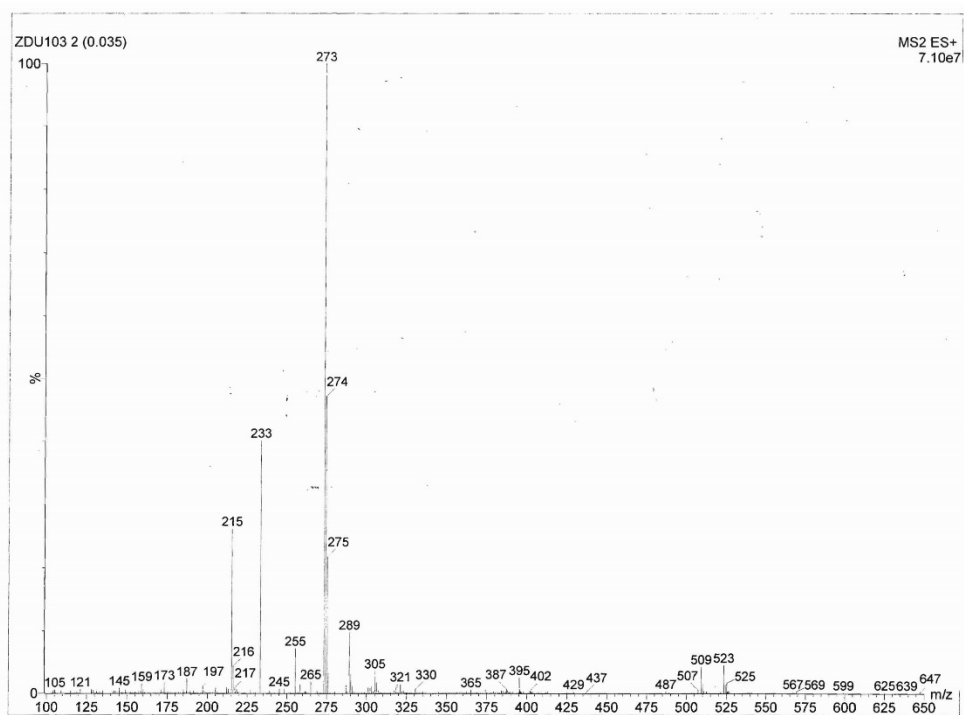

S44: <sup>1</sup>H NMR of auranticanol G (18)

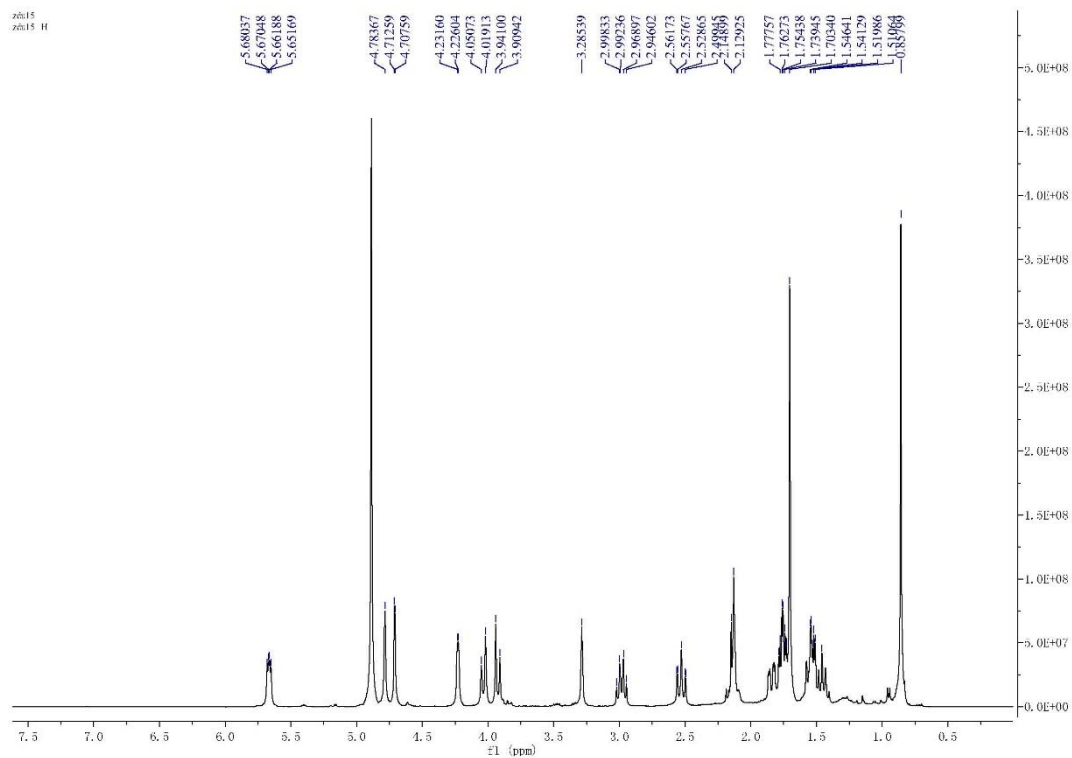

S45: DEPT of auranticanol G (18)

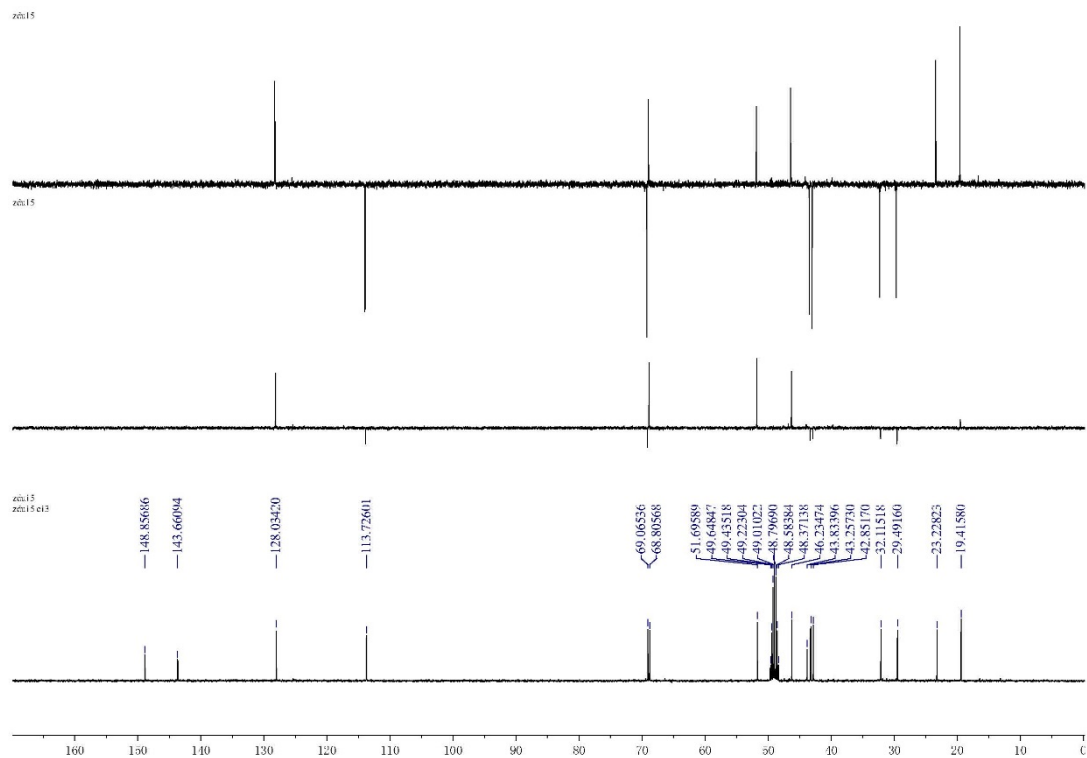

S46: HSQC of auranticanol G (18)

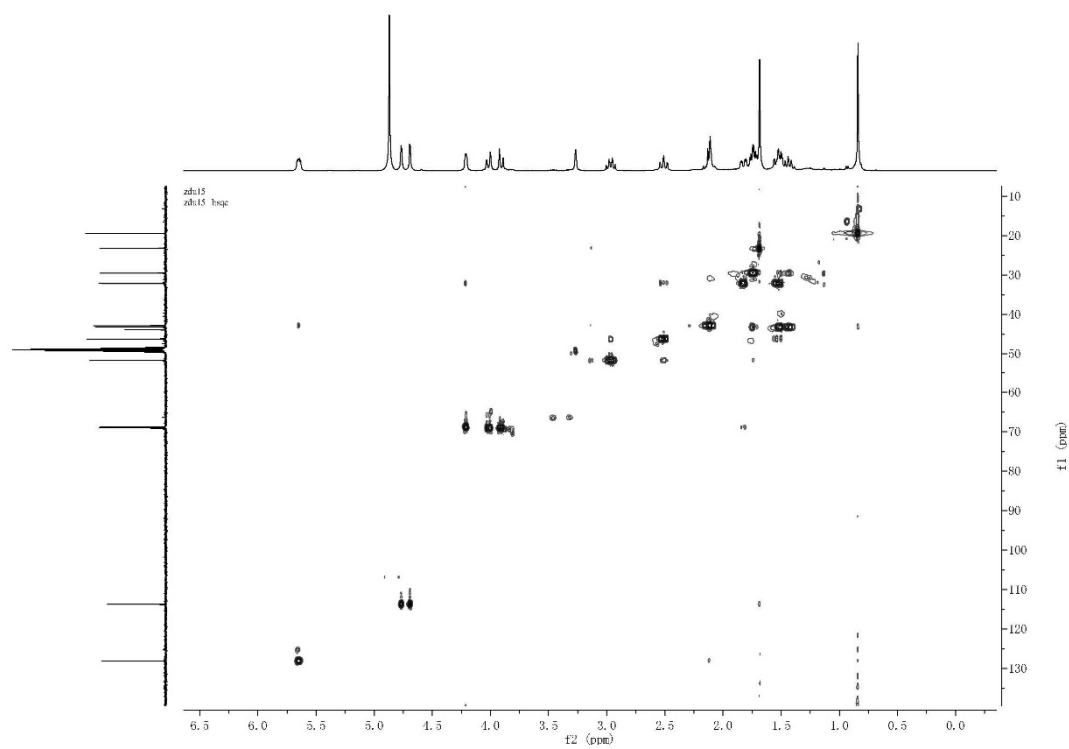

S47:  $^1\text{H}$ - $^1\text{H}$  COSY of auranticanol G (18)

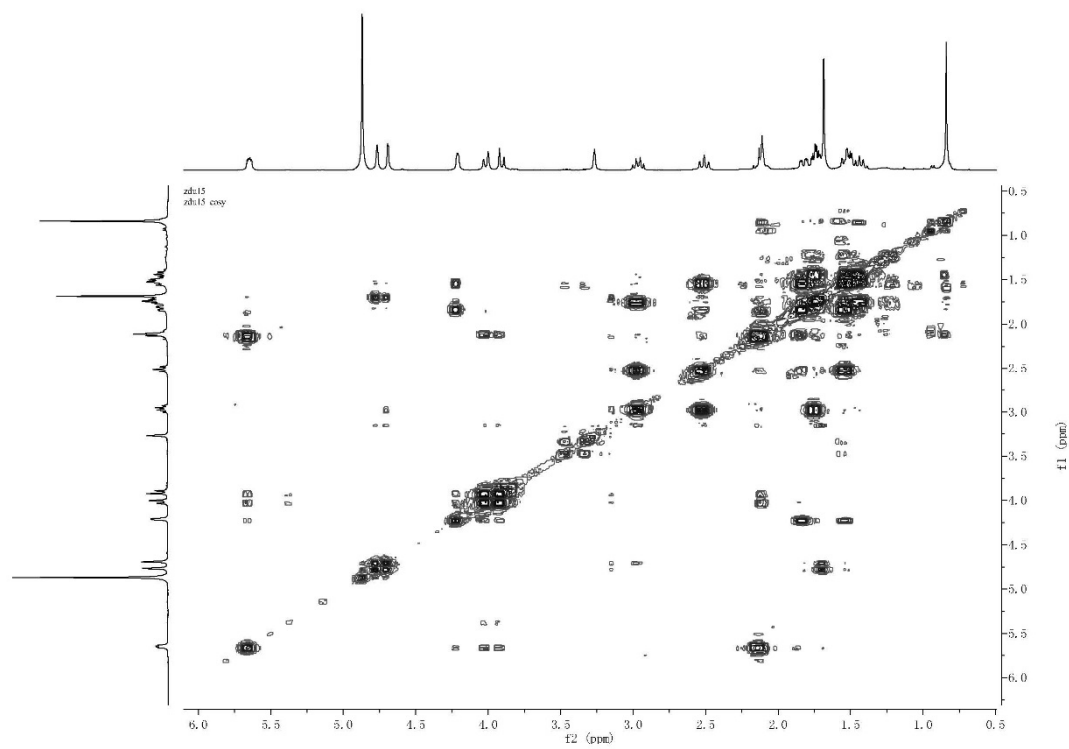

S48: HMBC of auranticanol G (18)

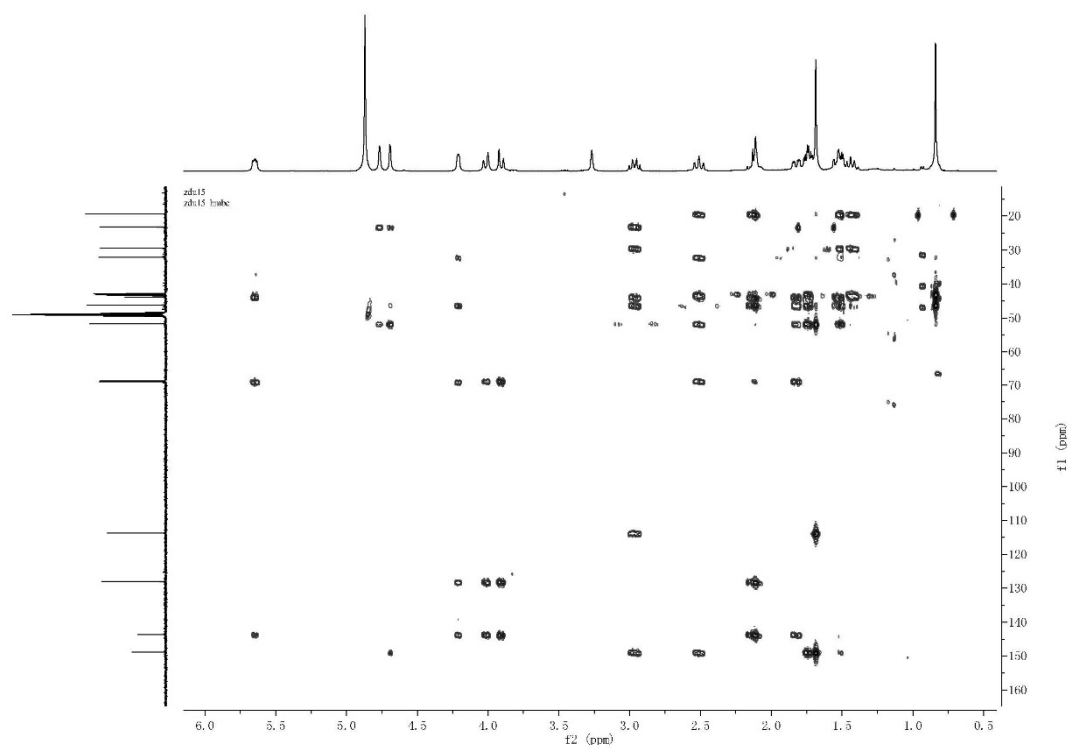

S49: ROESY of auranticanol G (18)

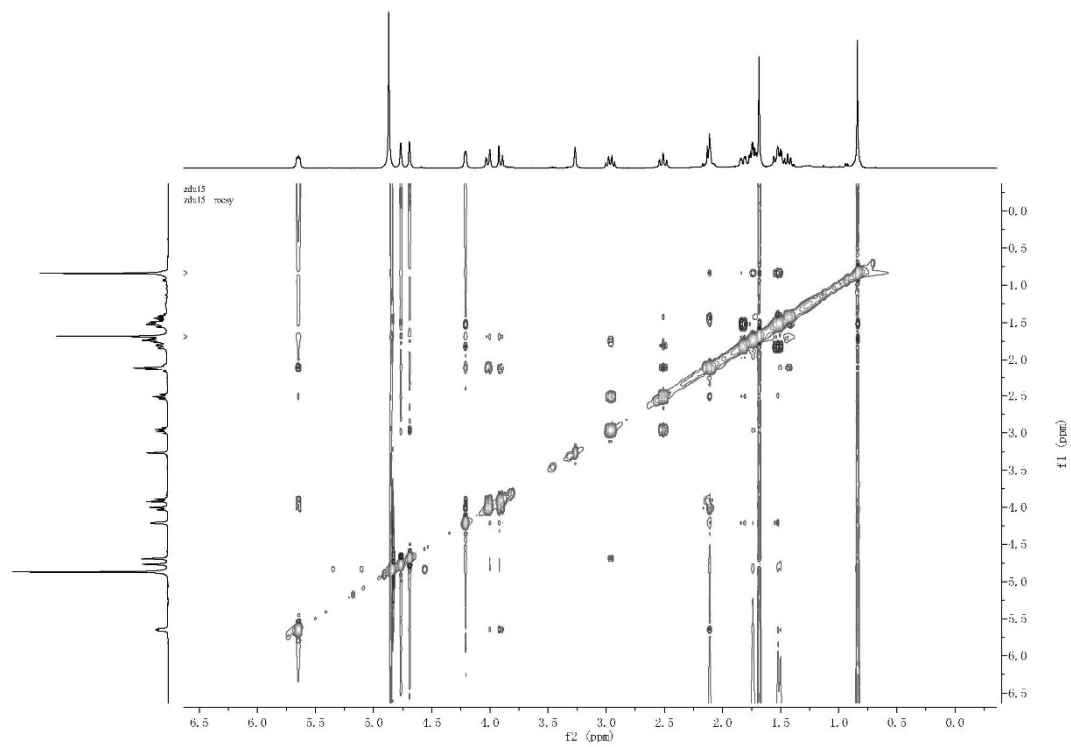

### S50: ESIMS of auranticanol G (18)

| Mass Spectrum List Report    |                                         |                          |                      |
|------------------------------|-----------------------------------------|--------------------------|----------------------|
| <b>Analysis Info</b>         |                                         | Acquisition Date         | 8/29/2011 5:18:41 PM |
| Analysis Name                | D:\DATA\2011file\1108\110829\Zdu-1501.d | Operator                 | quyan                |
| Method                       | ms_ptservice.m                          | Instrument               | HCT                  |
| Sample Name                  | Zdu-15                                  |                          |                      |
| <b>Acquisition Parameter</b> |                                         |                          |                      |
| Ion Source Type              | ESI                                     | Ion Polarity             | Positive             |
| Mass Range Mode              | Std/Enhanced                            | Scan Begin               | 100 m/z              |
| Capillary Exit               | 150.0 Volt                              | Skimmer                  | 40.0 Volt            |
| Accumulation Time            | 75 µs                                   | Averages                 | 5 Spectra            |
|                              |                                         | Alternating Ion Polarity | off                  |
|                              |                                         | Scan End                 | 600 m/z              |
|                              |                                         | Trap Drive               | 30.0                 |
|                              |                                         | Auto MS/MS               | off                  |

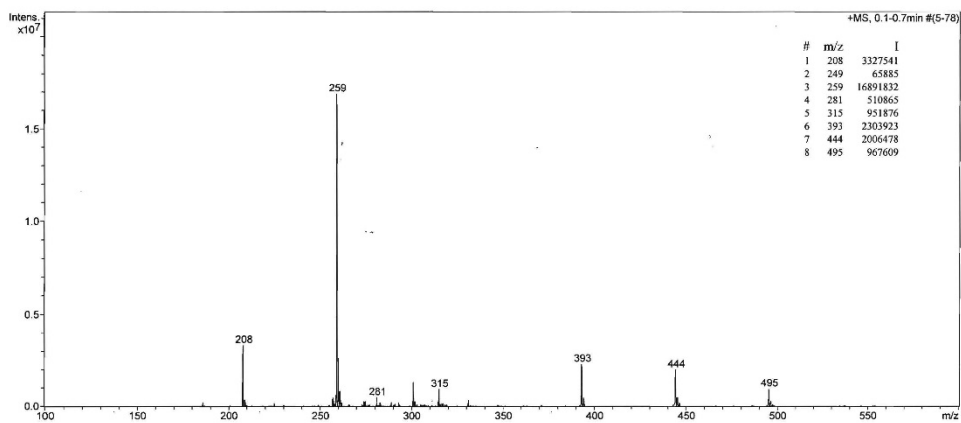

### S51: <sup>1</sup>H NMR of auranticanol H (19)

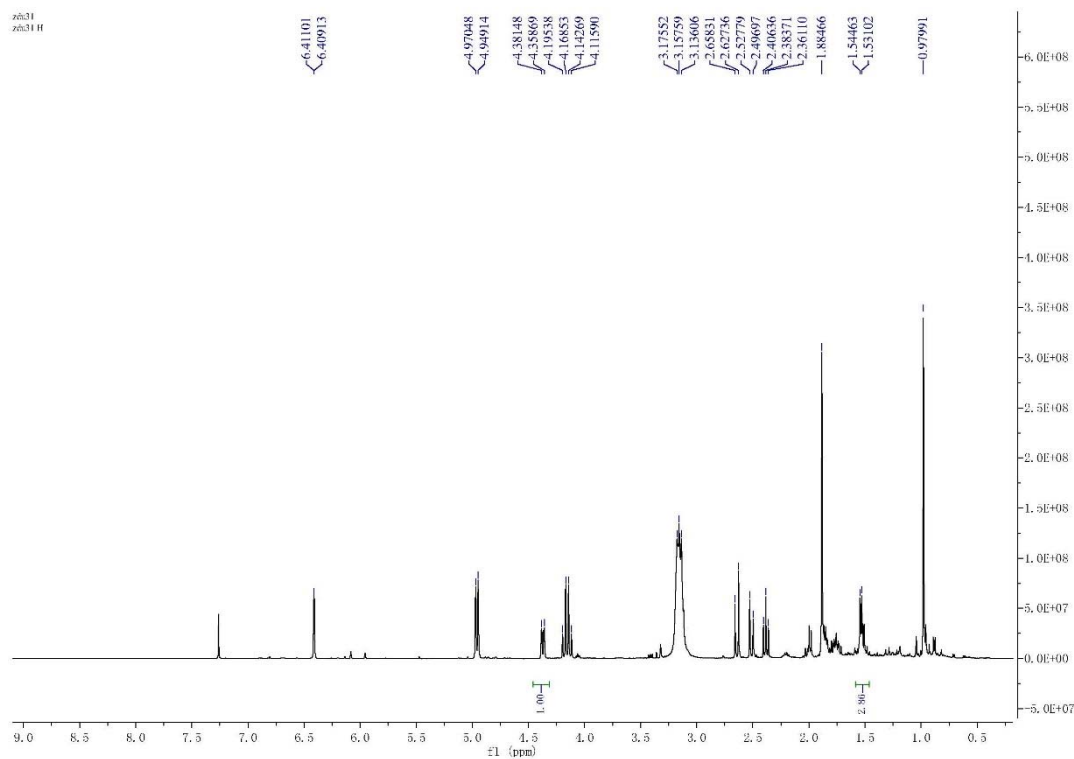

S52: DEPT of auranticanol H (19)

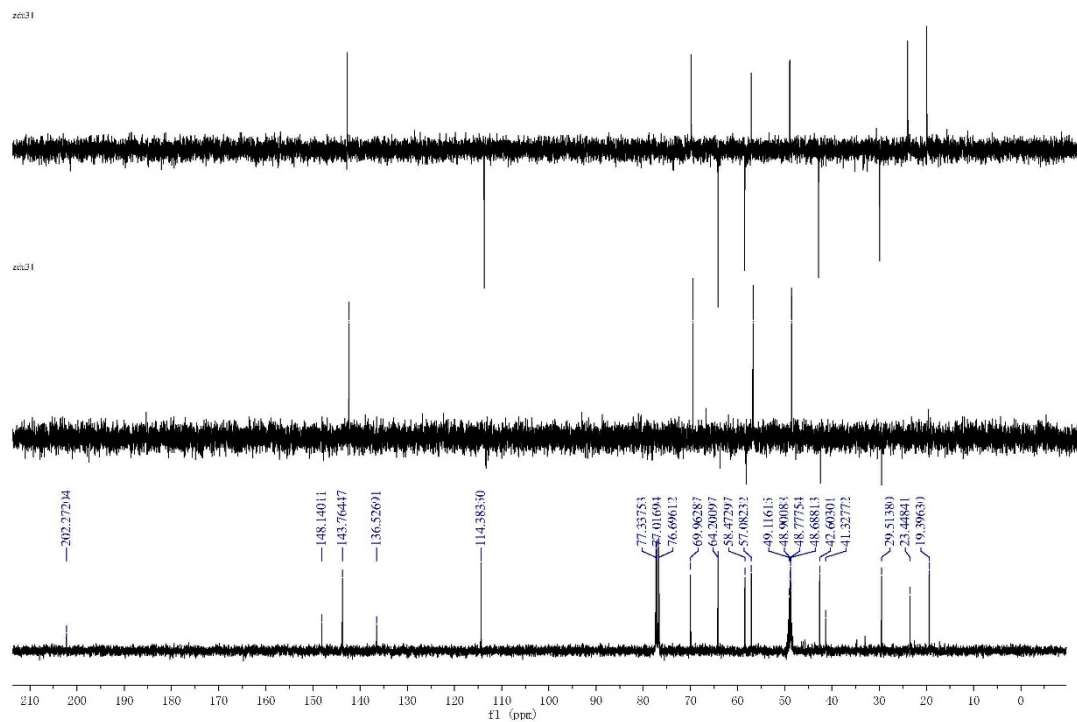

S53: HSQC of auranticanol H (19)

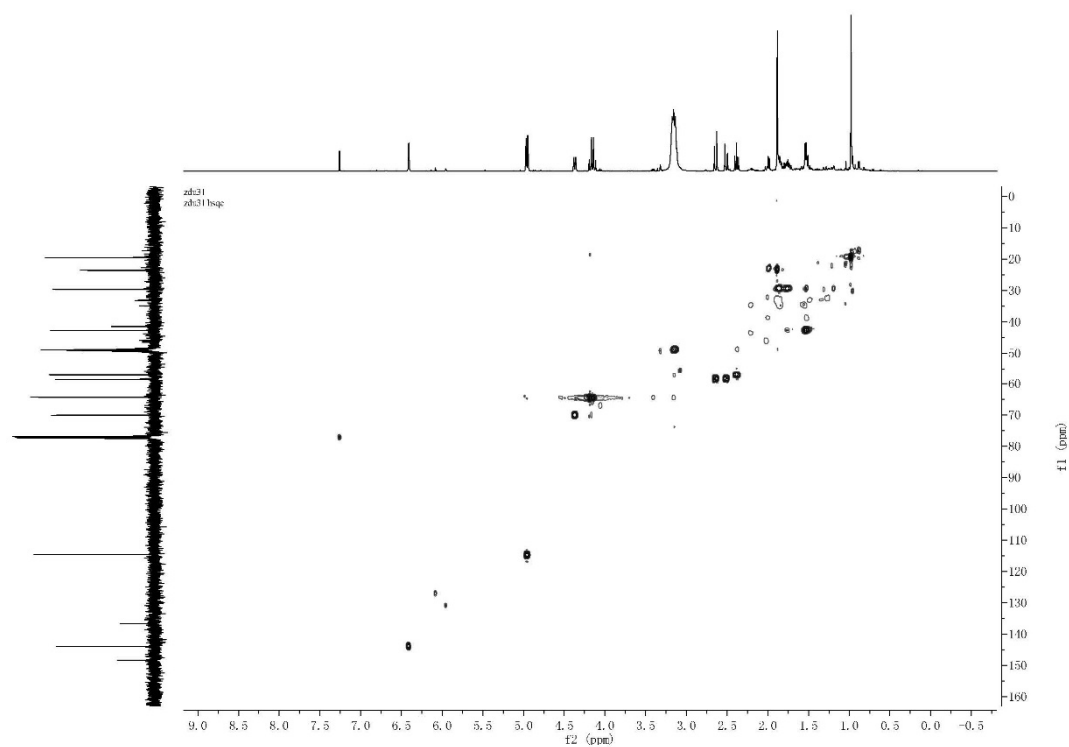

S54:  $^1\text{H}$ - $^1\text{H}$  COSY of auranticanol H (19)

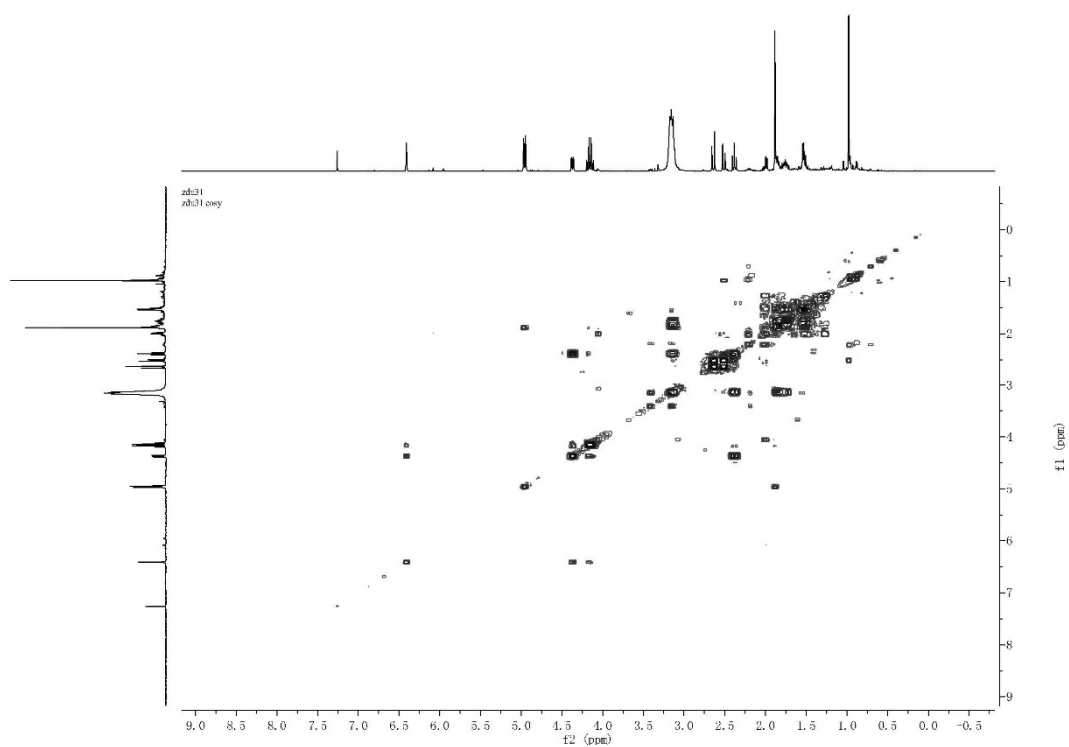

S55: HMBC of auranticanol H (19)

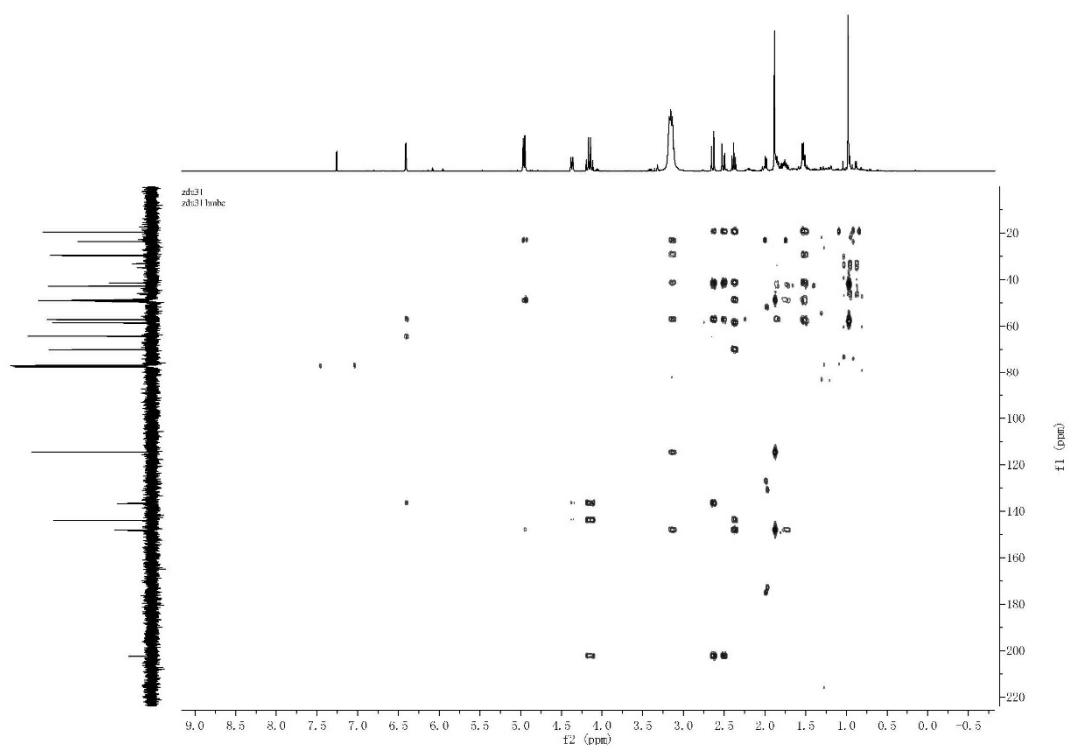

S56: ROESY of auranticanol H (19)

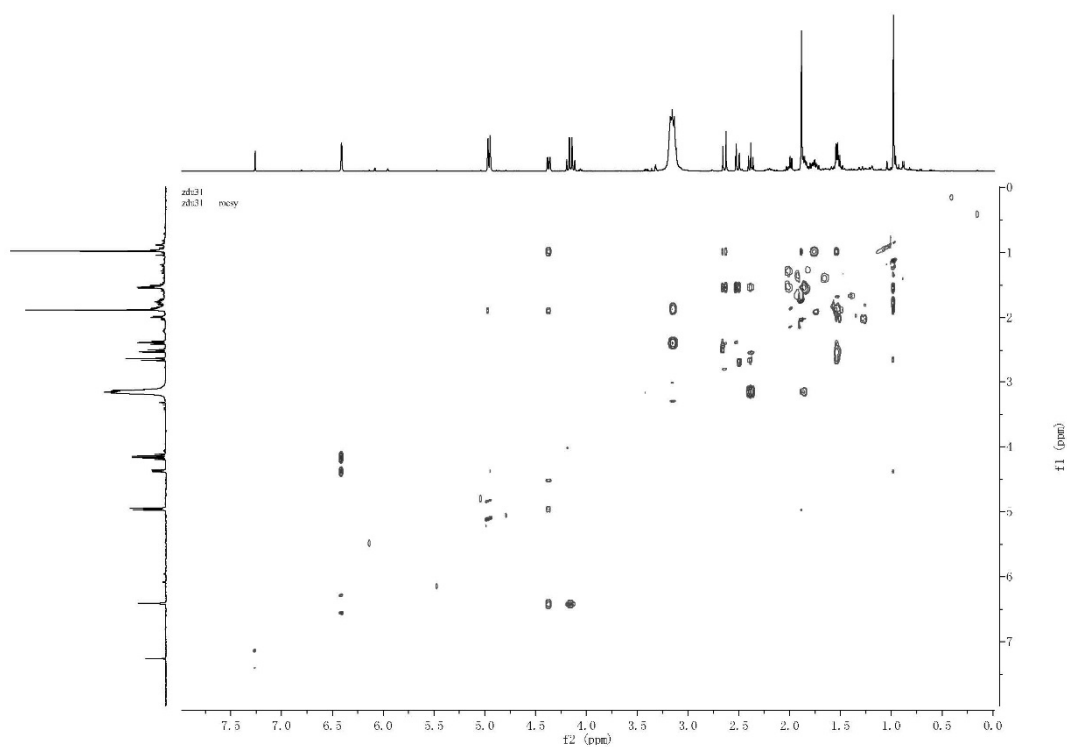

S57: ESIMS of auranticanol H (19)

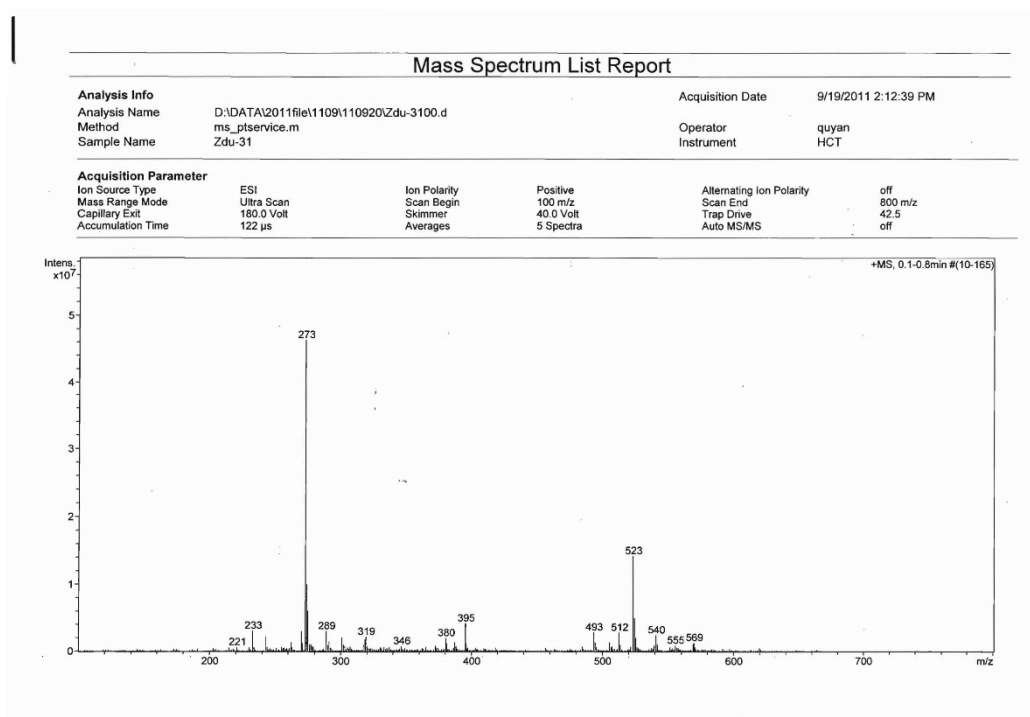



S58: <sup>1</sup>H NMR of auranticanol I (20)

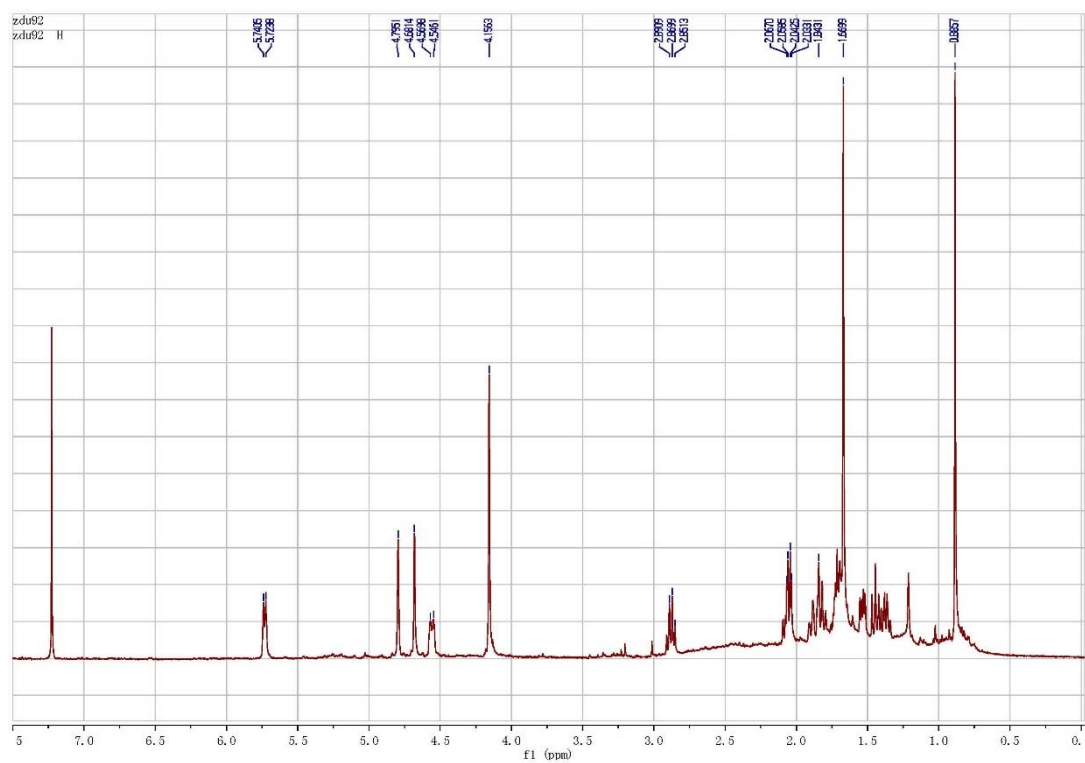

S59: DEPT of auranticanol I (20)

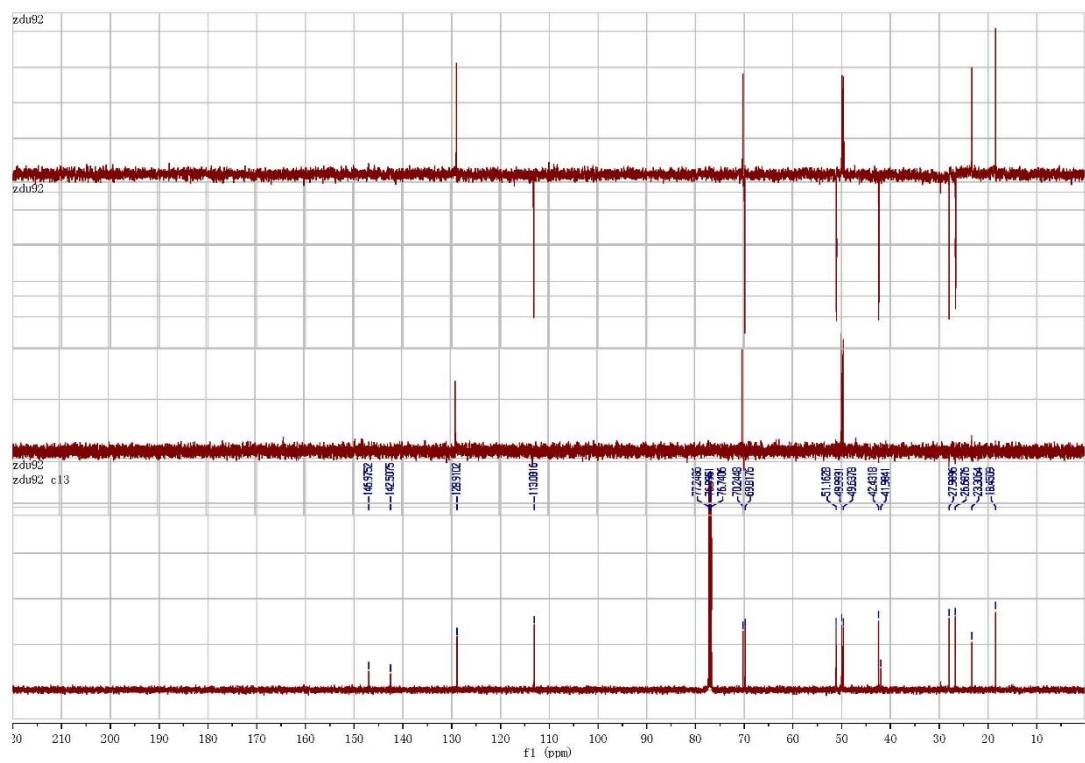

S60: HSQC of auranticanol I (20)

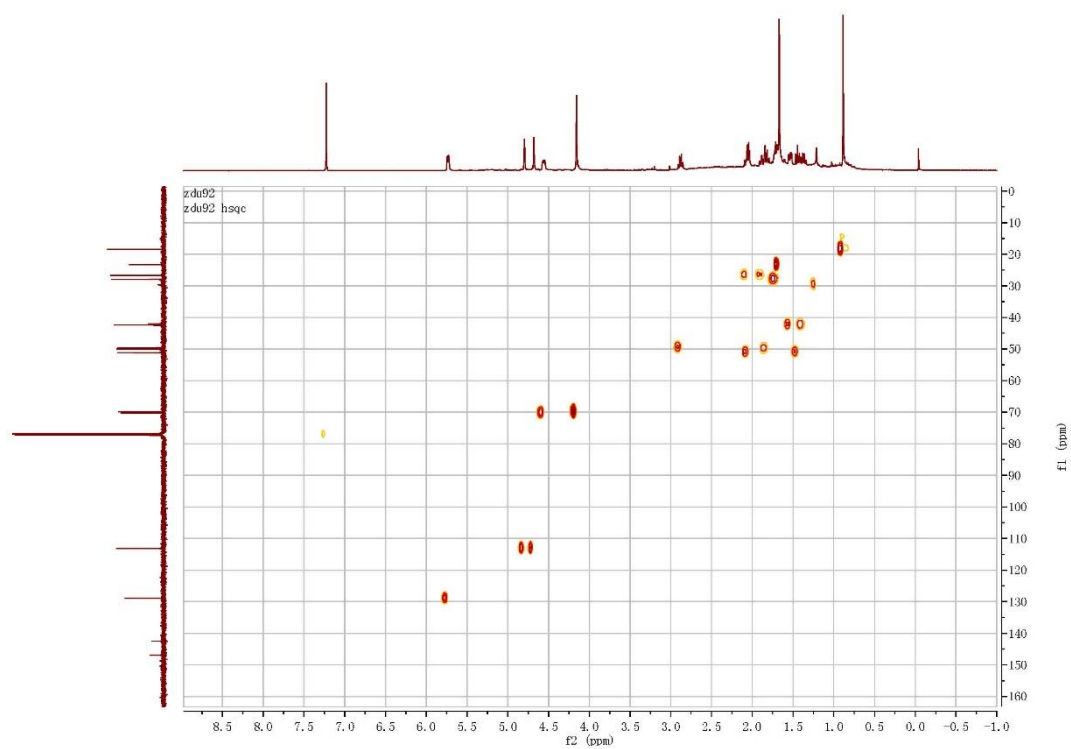

S61:  $^1\text{H}$ - $^1\text{H}$  COSY of auranticanol I (20)

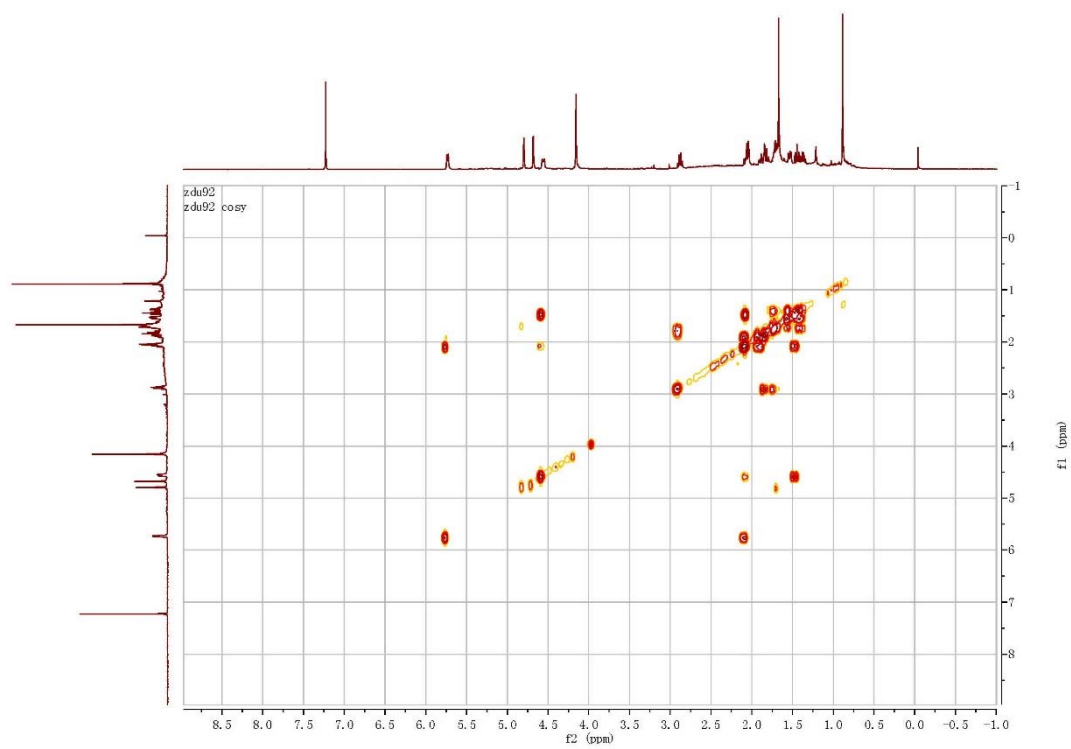

S62: HMBC of auranticanol I (20)

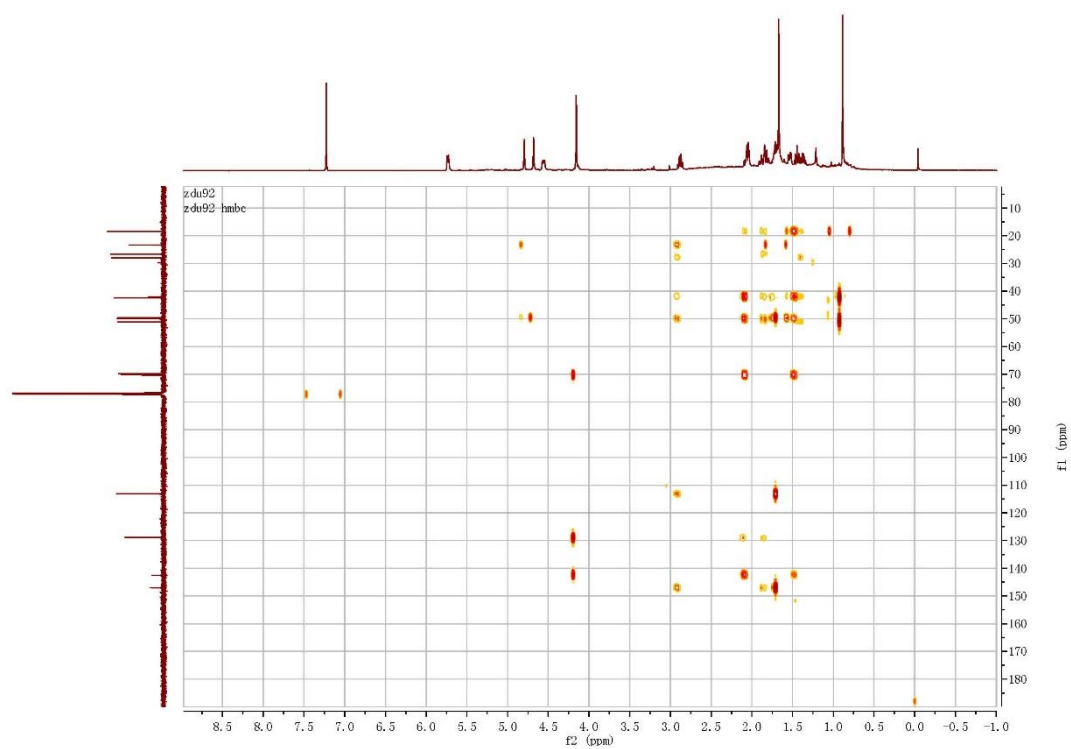

S63: ROESY of auranticanol I (20)

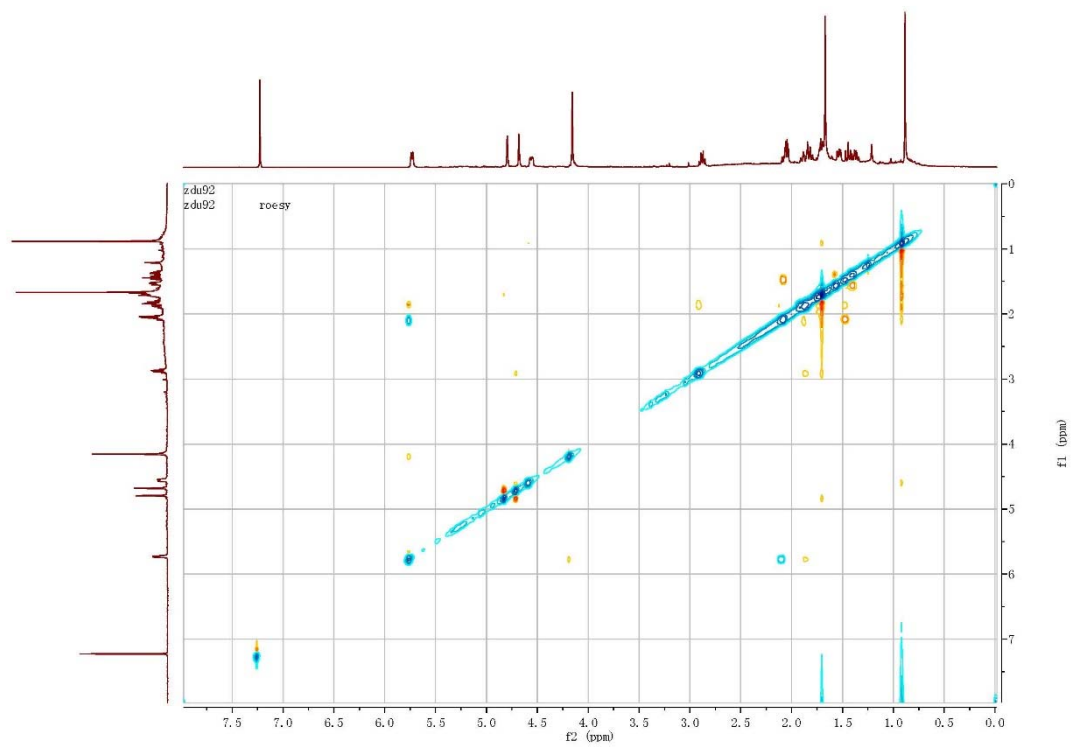

S64: ESIMS of auranticanol I (20)

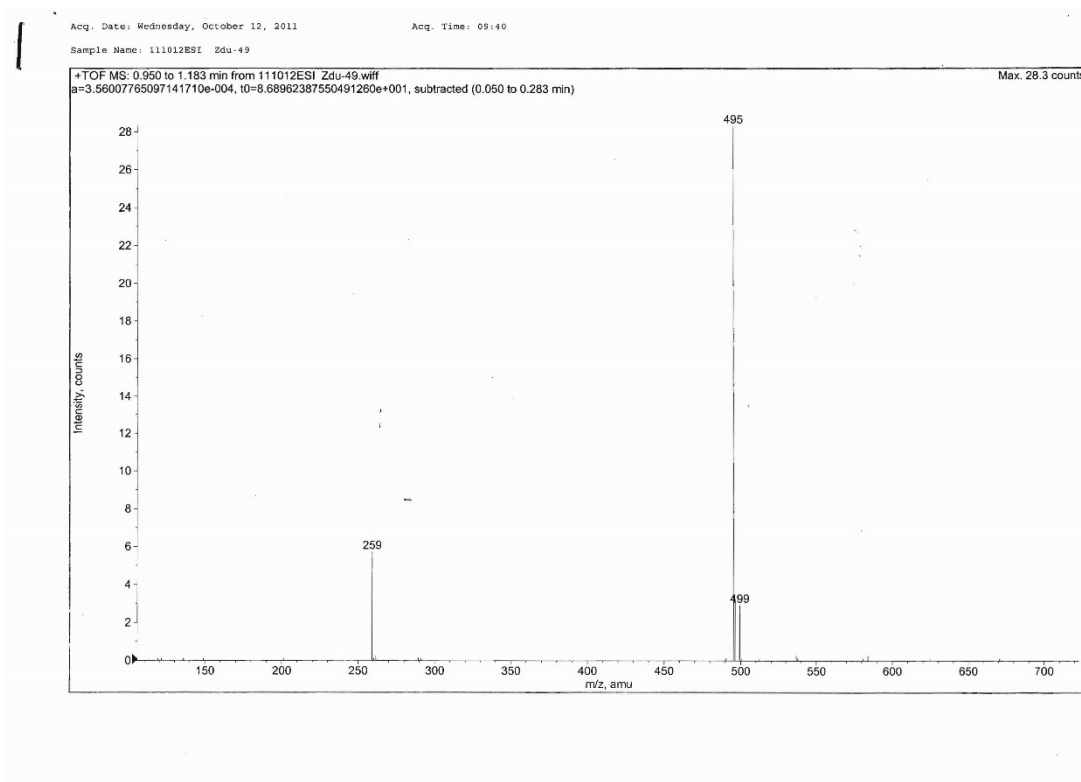

S65: <sup>1</sup>H NMR of auranticanol J (21)

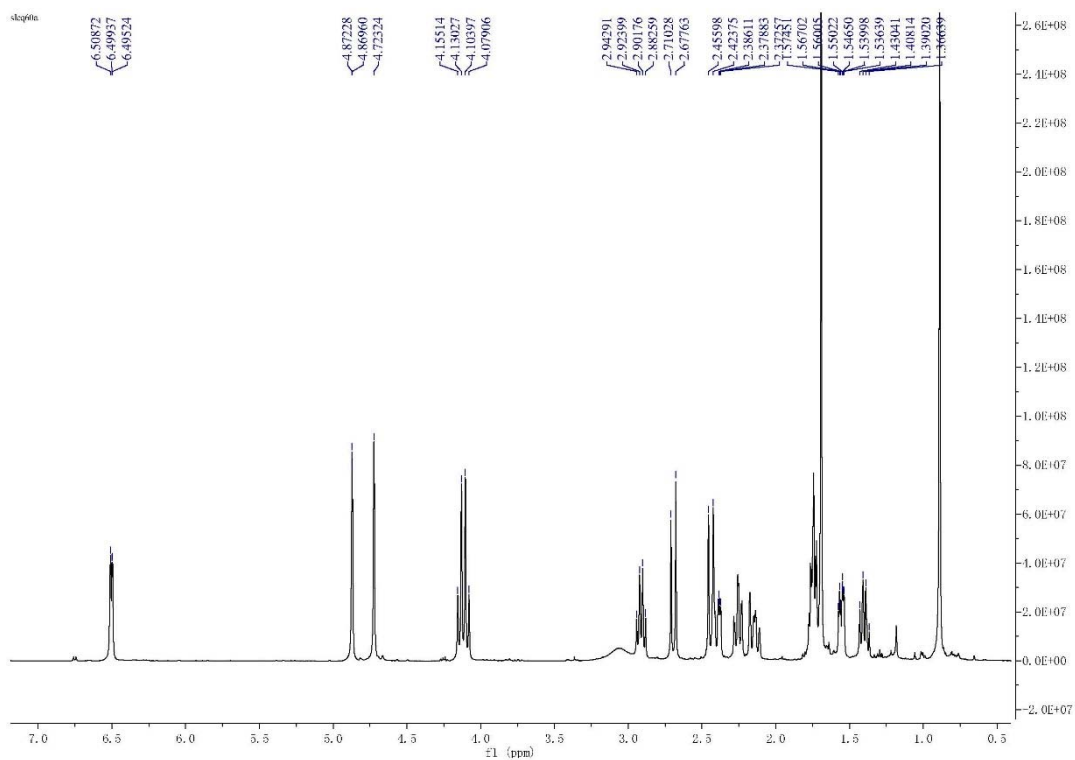

S66: DEPT of auranticanol J (21)

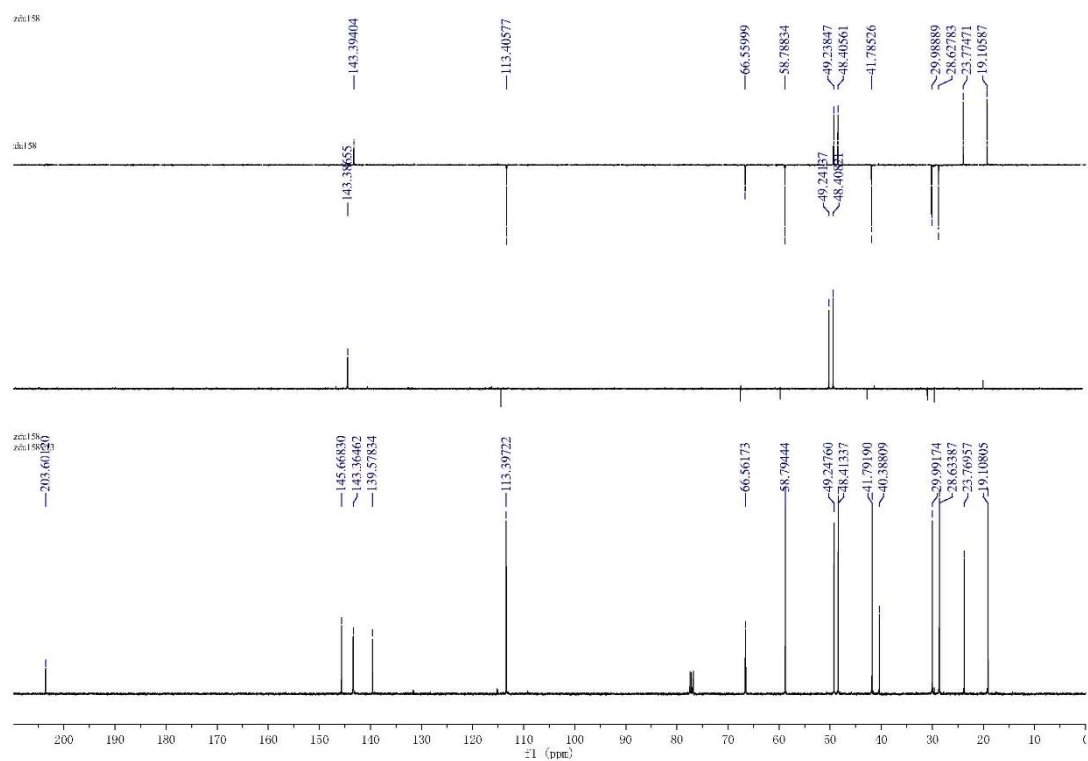

S67: HSQC of auranticanol J (21)

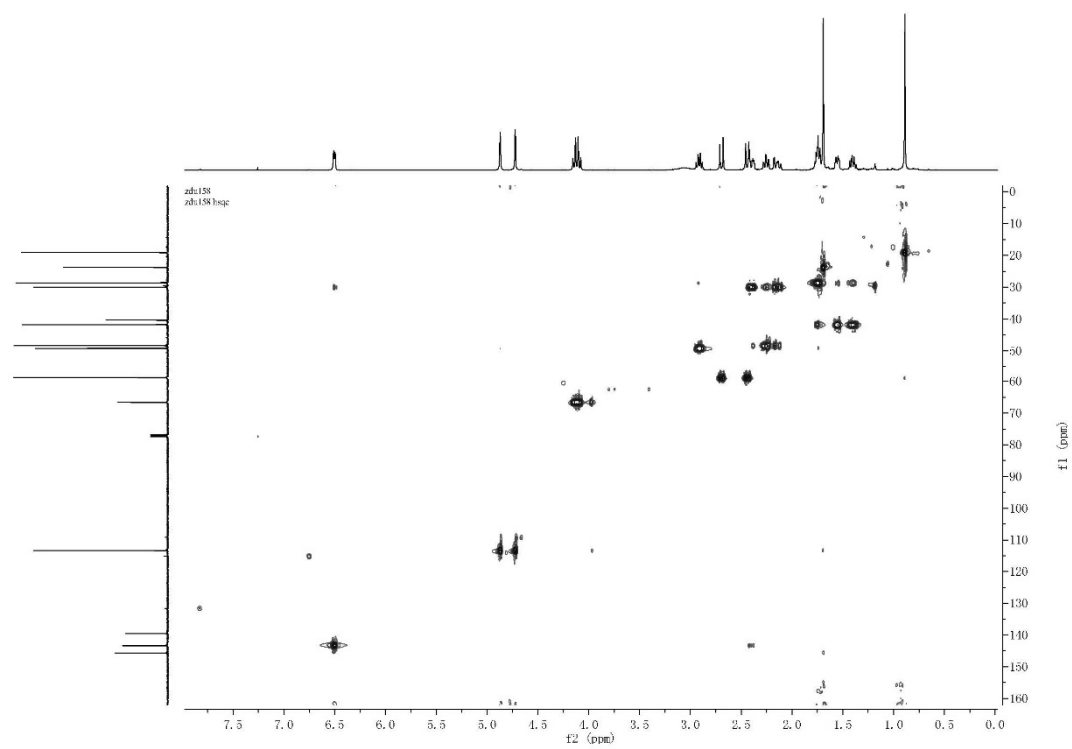

S68:  $^1\text{H}$ - $^1\text{H}$  COSY of auranticanol J (21)

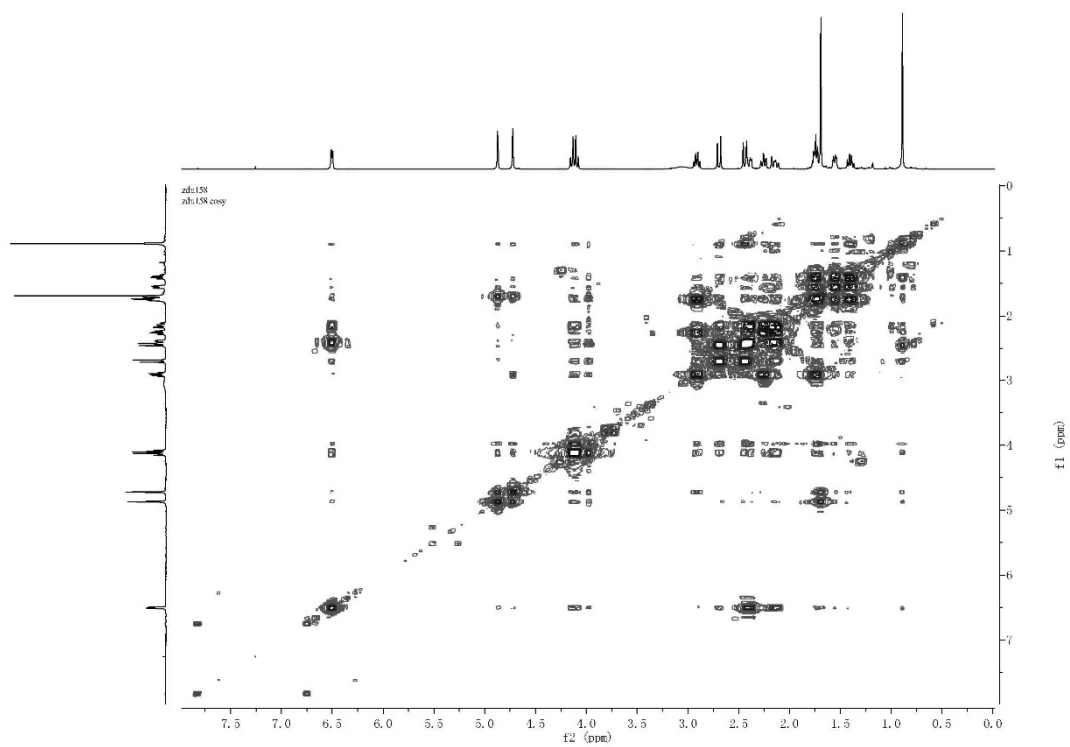

S69: HMBC of auranticanol J (21)

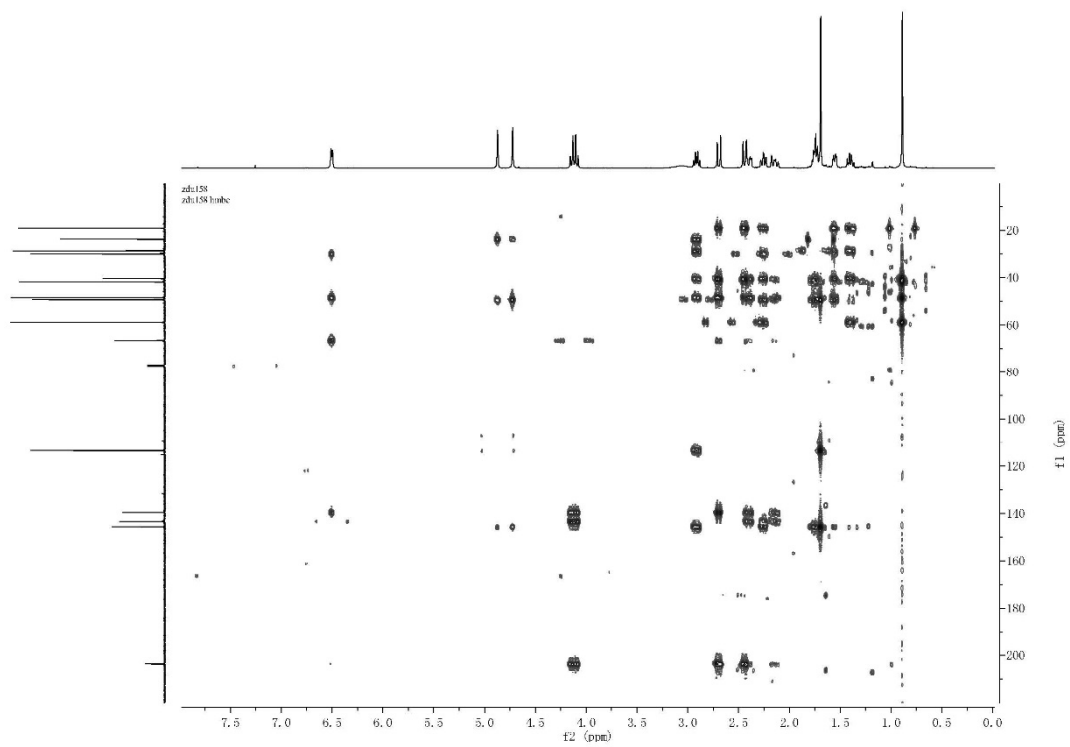

S70: ROESY of auranticanol J (21)

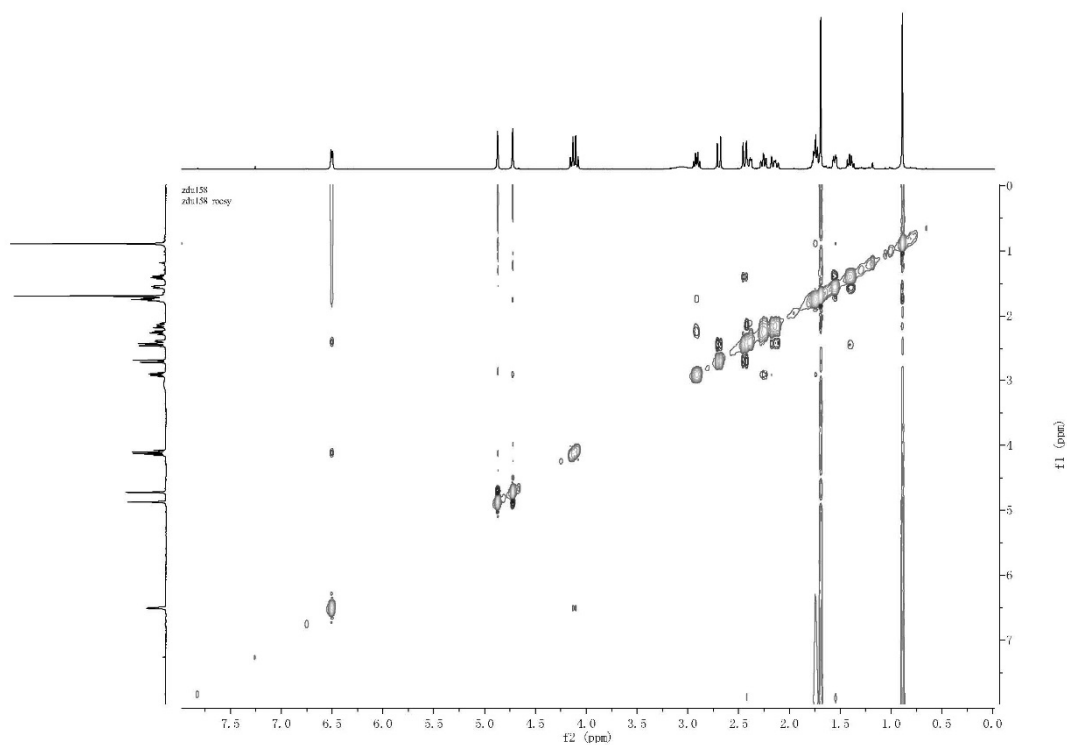

S71: ESIMS of auranticanol J (21)

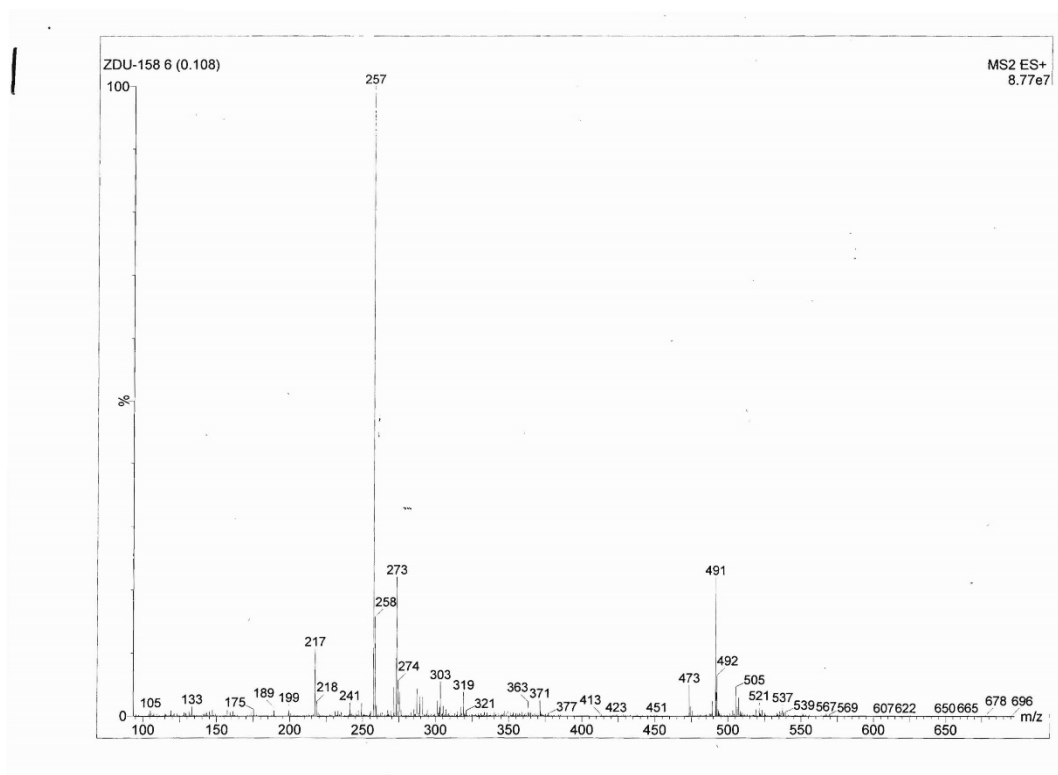

S73: <sup>1</sup>H NMR of auranticanol K (22)

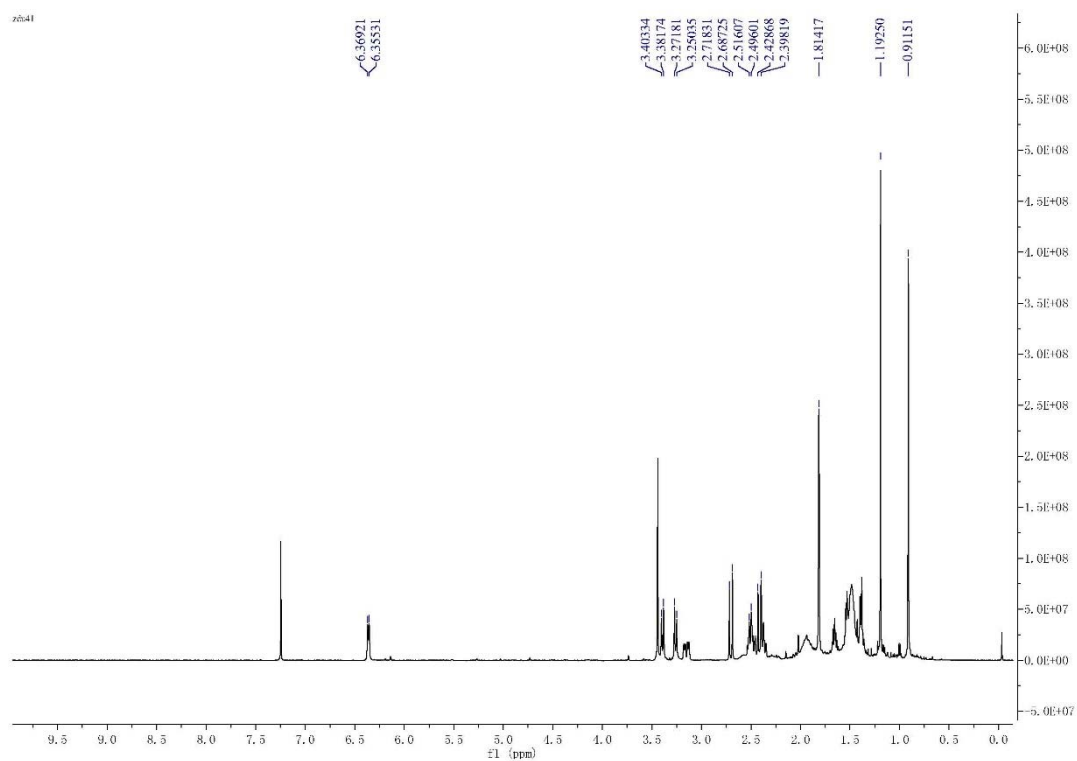

S74: DEPT of auranticanol K (22)

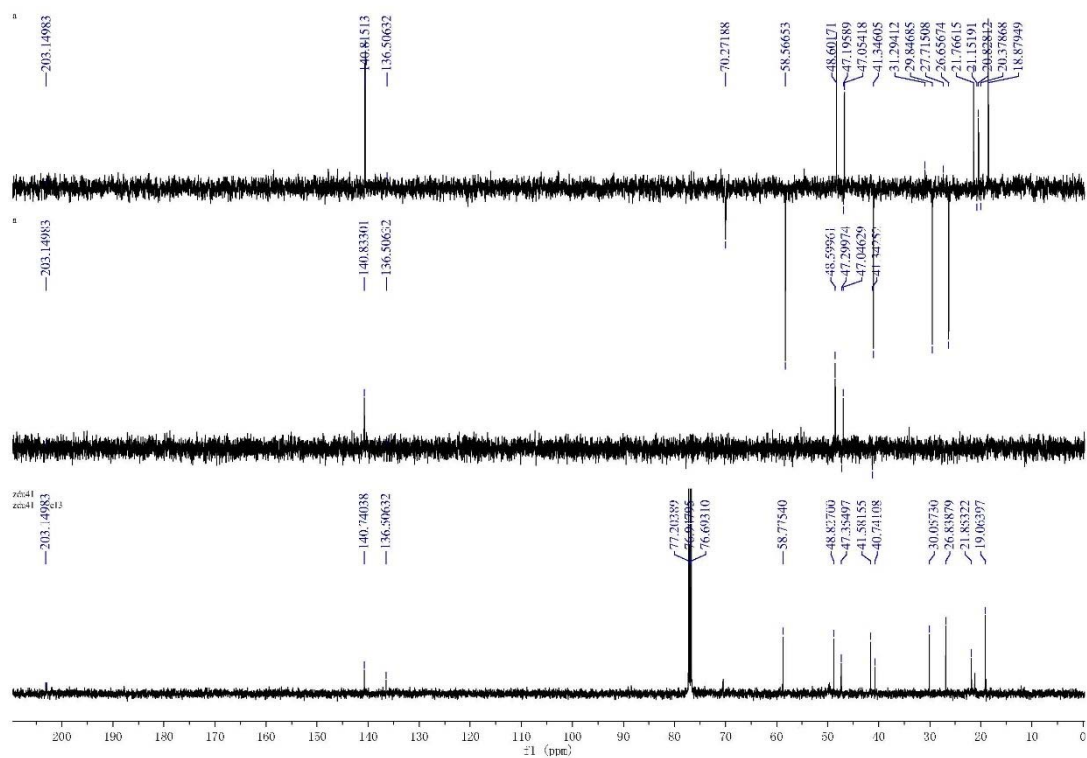



S75: HSQC of auranticanol K (22)

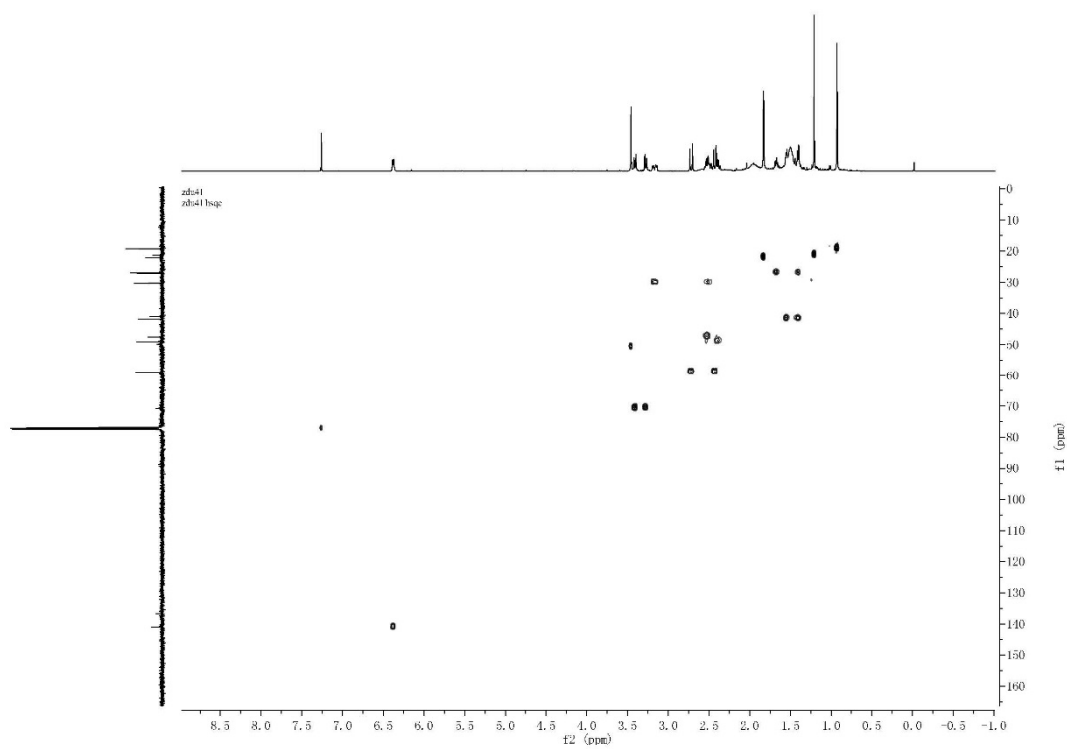

S76:  $^1\text{H}$ - $^1\text{H}$  COSY of auranticanol K (22)

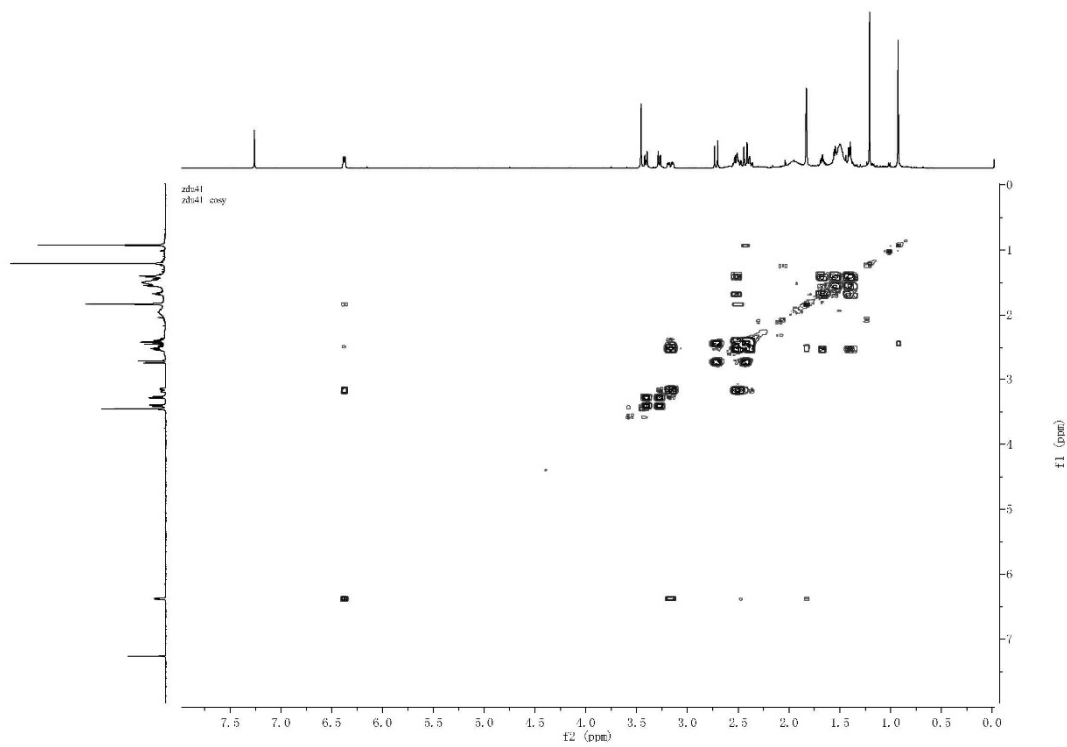

S77: HMBC of auranticanol K (22)

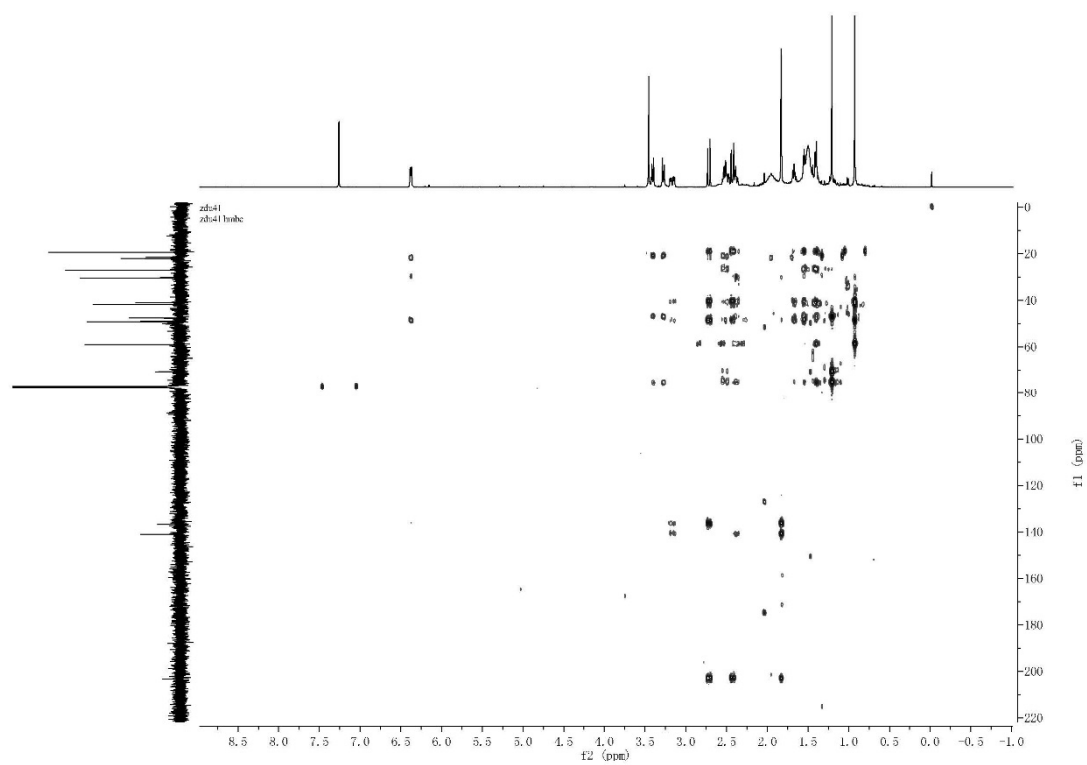

S78: ROESY of auranticanol K (22)

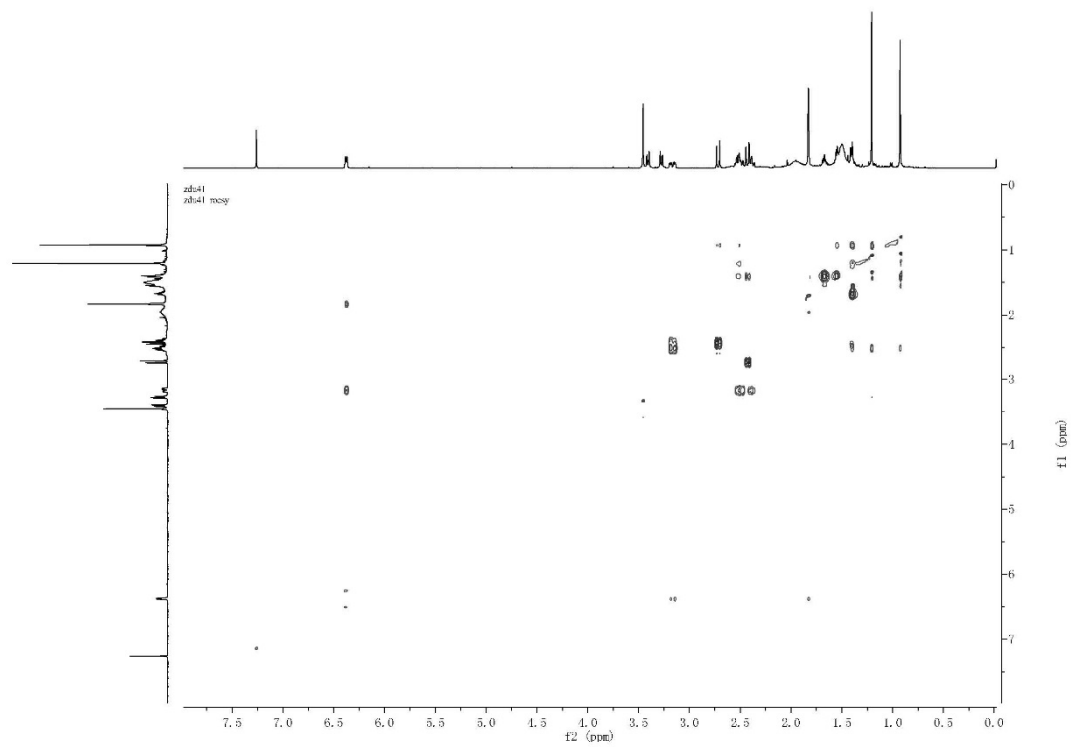

S79: ESIMS of auranticanol K (22)

| Analysis Info         |                                         | Acquisition Date         |            |
|-----------------------|-----------------------------------------|--------------------------|------------|
| Analysis Name         | D:\DATA\2011\file1109\110930\zdu-4100.d | 9/28/2011 5:51:39 PM     |            |
| Method                | ms_plservice.m                          | Operator                 | quyan      |
| Sample Name           | zdu-41                                  | Instrument               | HCT        |
| Acquisition Parameter |                                         |                          |            |
| Ion Source Type       | ESI                                     | Ion Polarity             | Positive   |
| Mass Range Mode       | Ultra Scan                              | Scan Begin               | 100 m/z    |
| Capillary Exit        | 180.0 Volt                              | Skimmer                  | 40.0 Volt  |
| Accumulation Time     | 5315 $\mu$ s                            | Averages                 | 10 Spectra |
|                       |                                         | Alternating Ion Polarity | off        |
|                       |                                         | Scan End                 | 800 m/z    |
|                       |                                         | Trap Drive               | 42.7       |
|                       |                                         | Auto MS/MS               | off        |

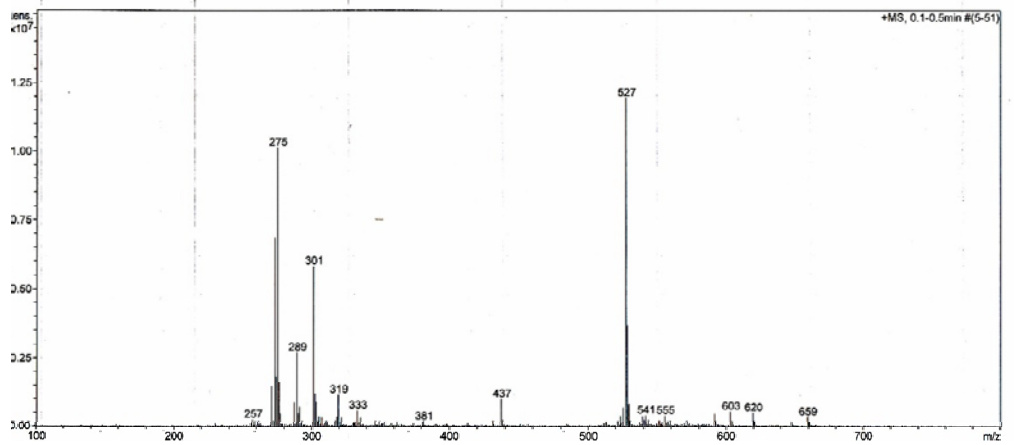

S80: <sup>1</sup>H NMR of auranticanol L (23)

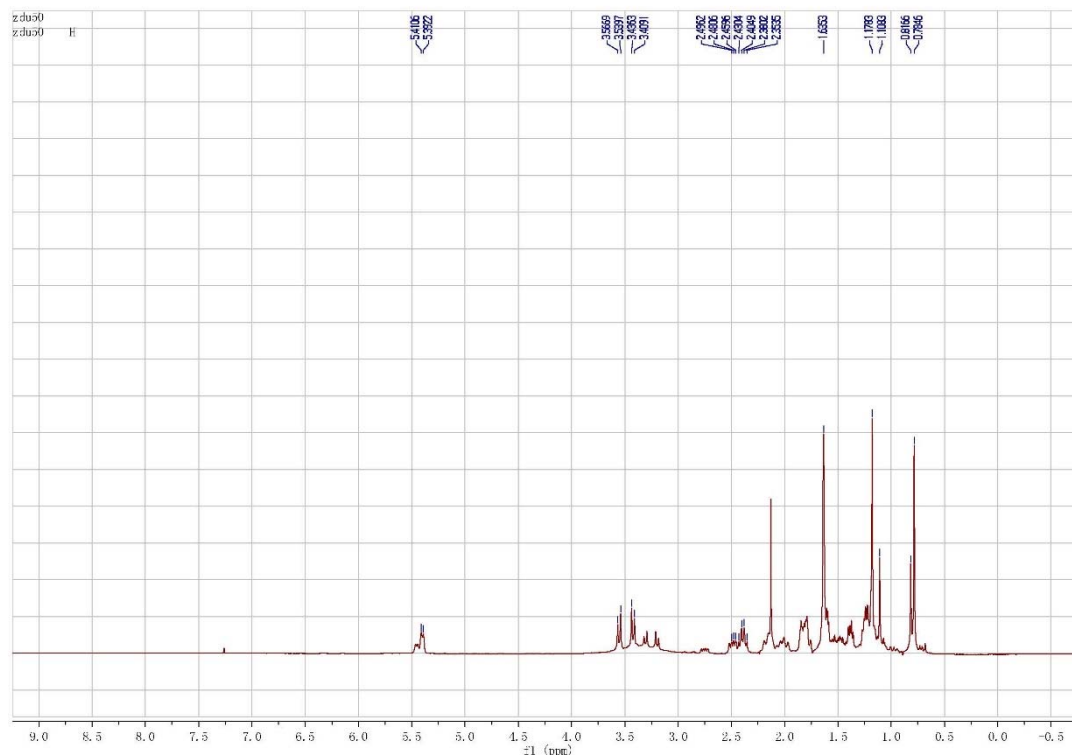

S81: DEPT of auranticanol L (23)

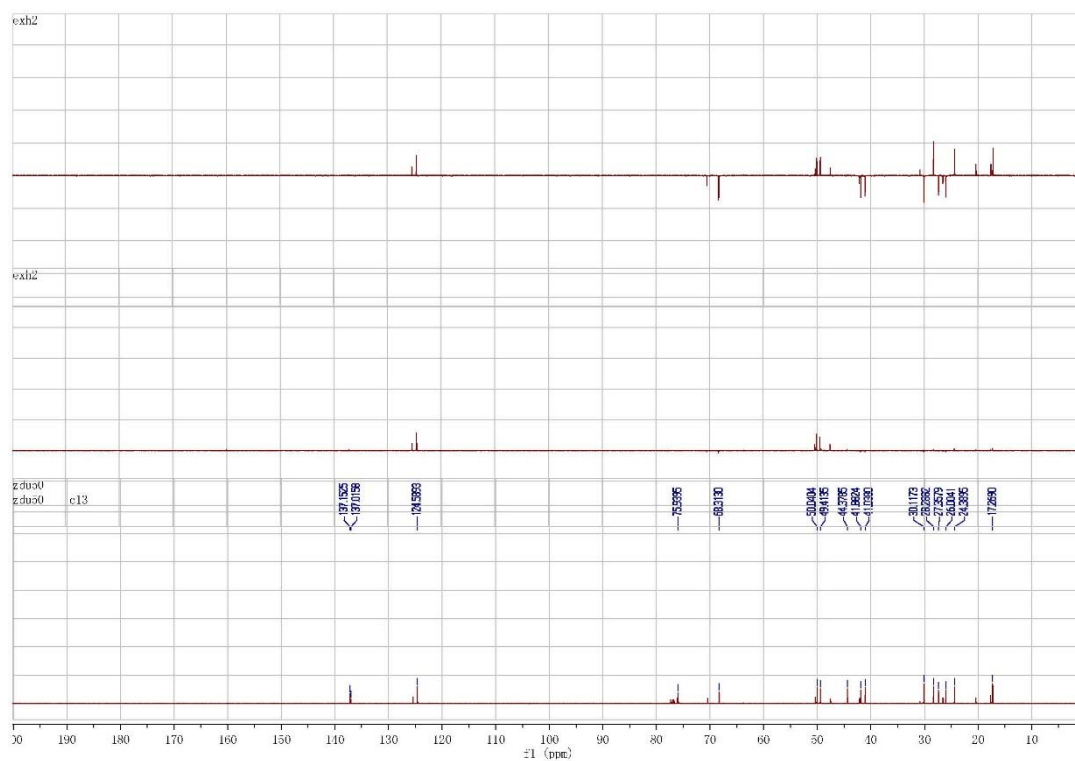

S82: HSQC of auranticanol L (23)

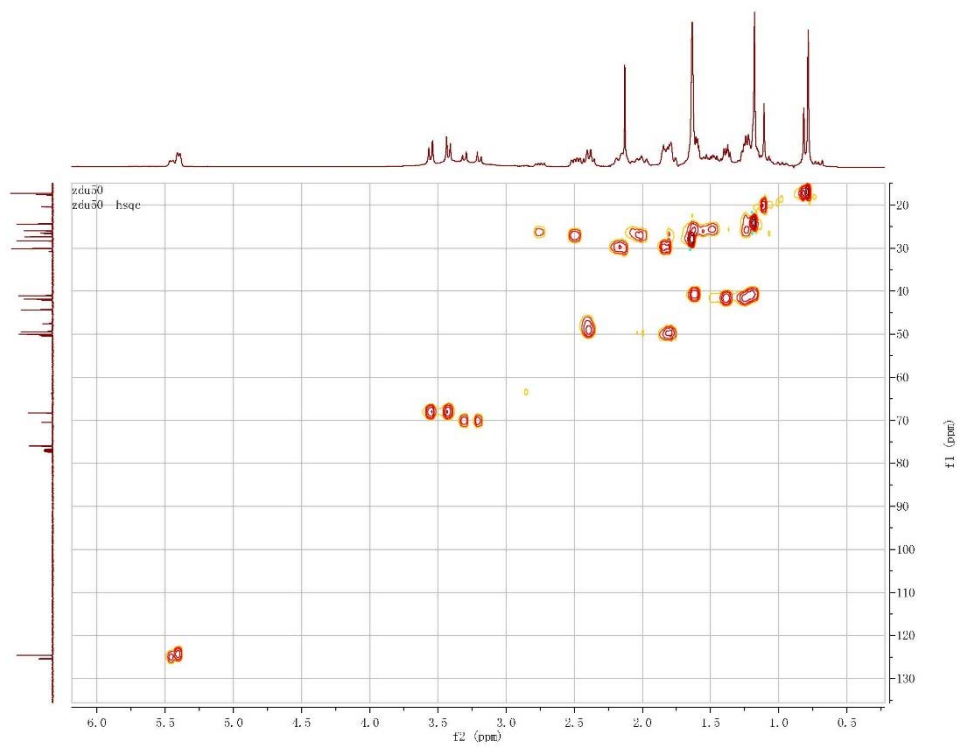

S83:  $^1\text{H}$ - $^1\text{H}$  COSY of auranticanol L (23)

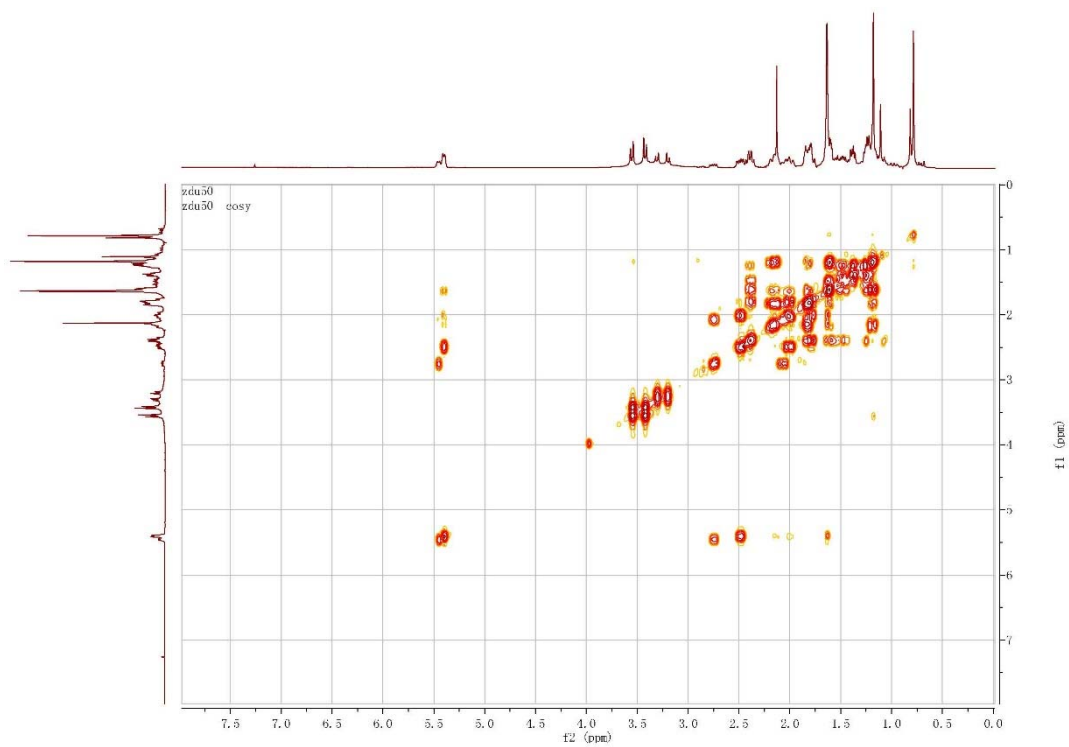

S84: HMBC of auranticanol L (23)

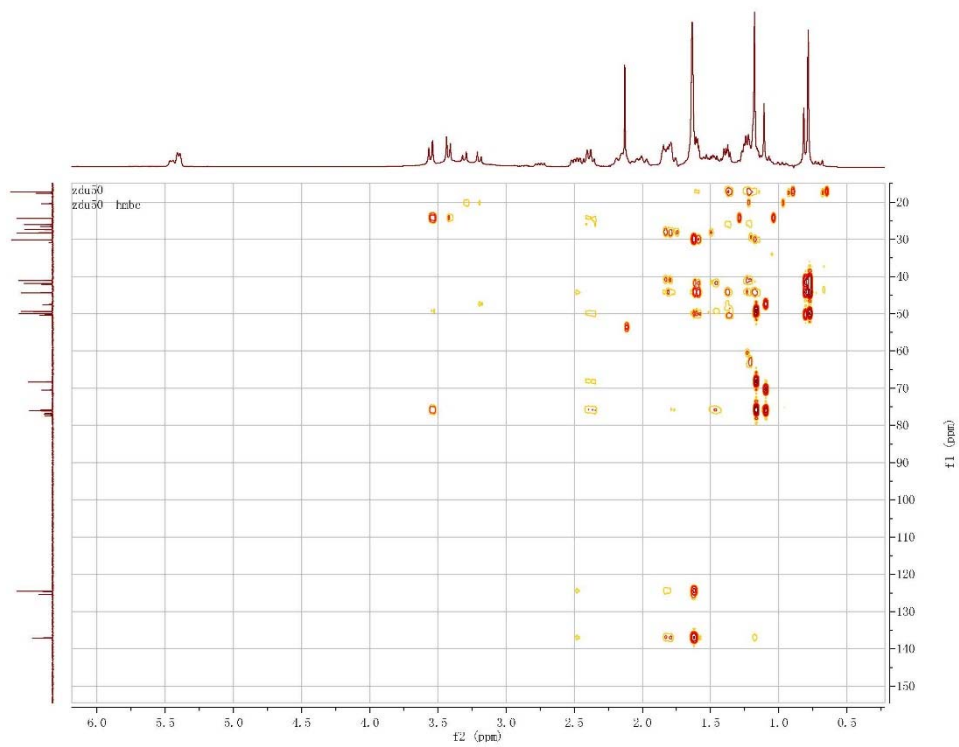

S85: ROESY of auranticanol L (23)

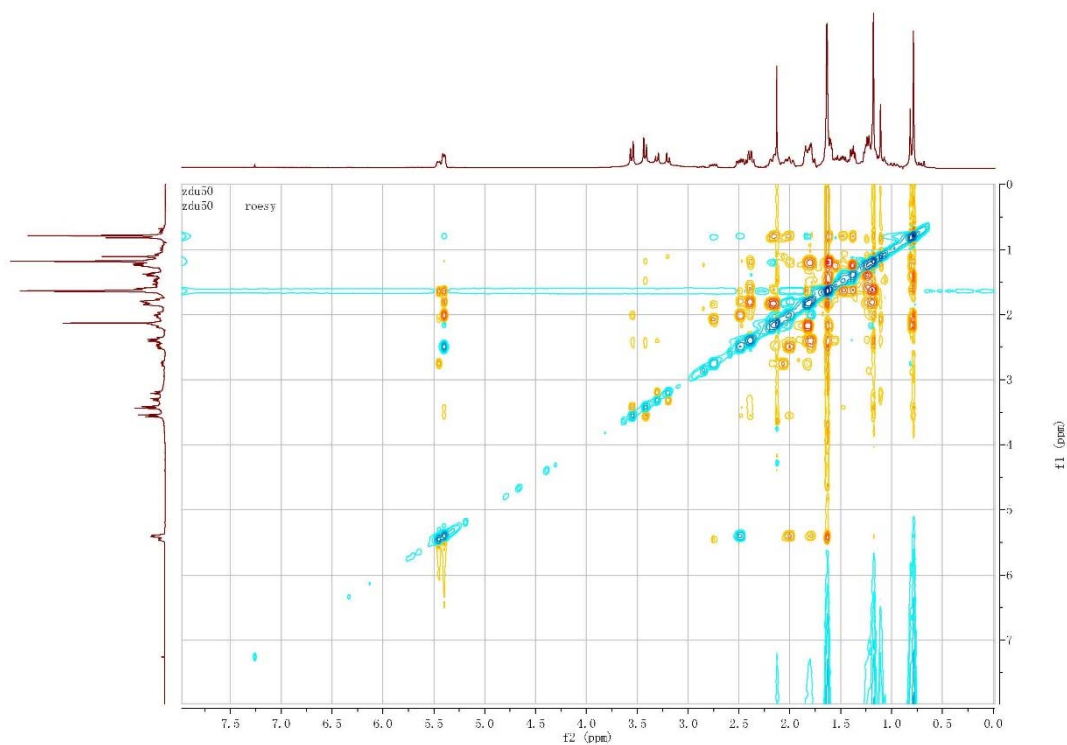

S86: ESIMS of auranticanol L (23)

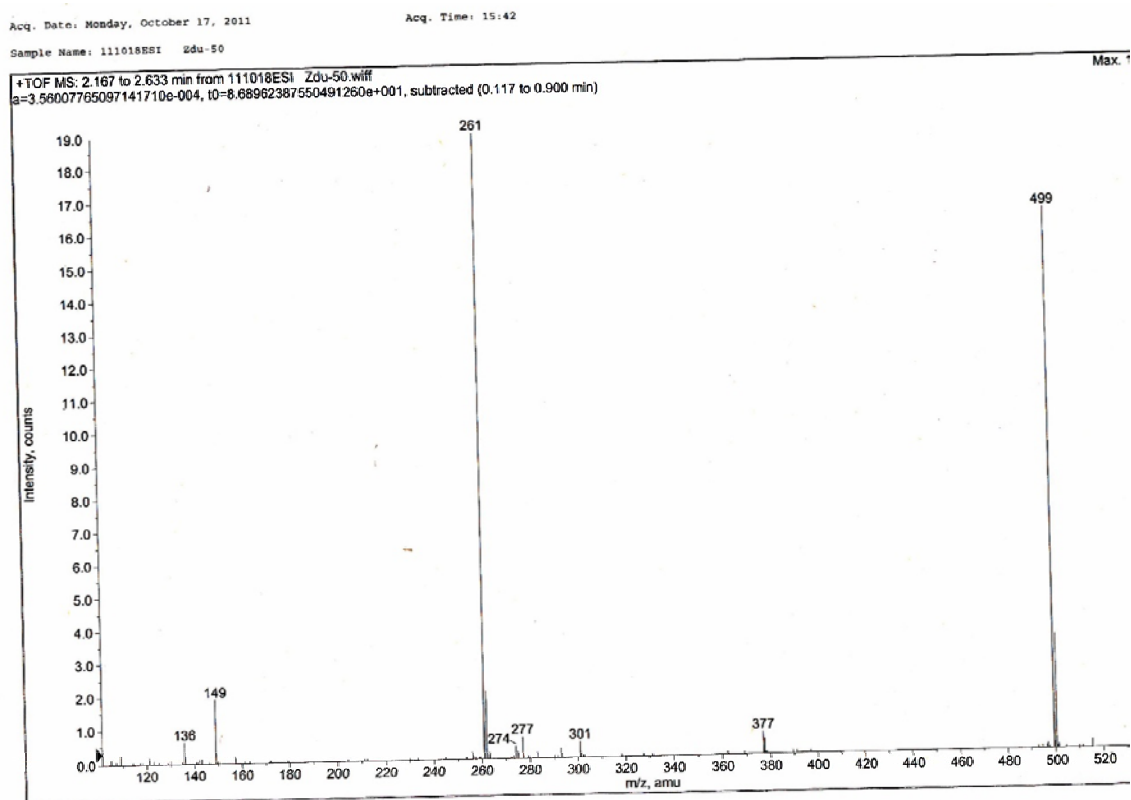

S87: <sup>1</sup>H NMR of auranticanol M (24)

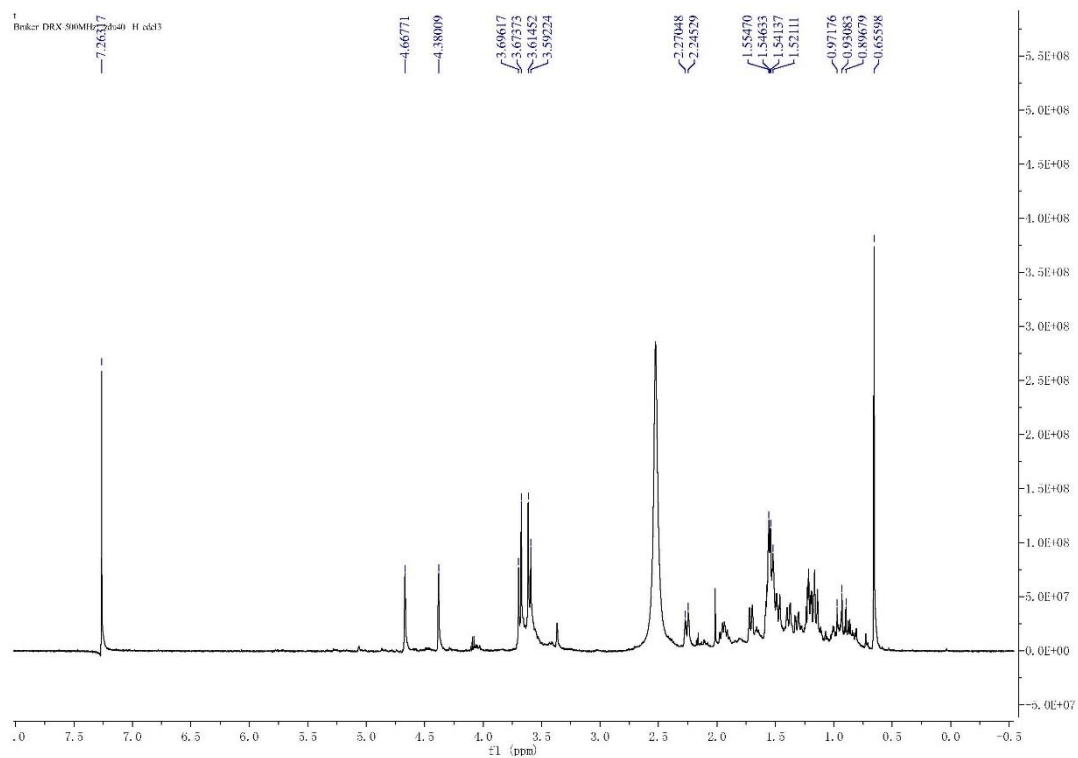

S88: DEPT of auranticanol M (24)

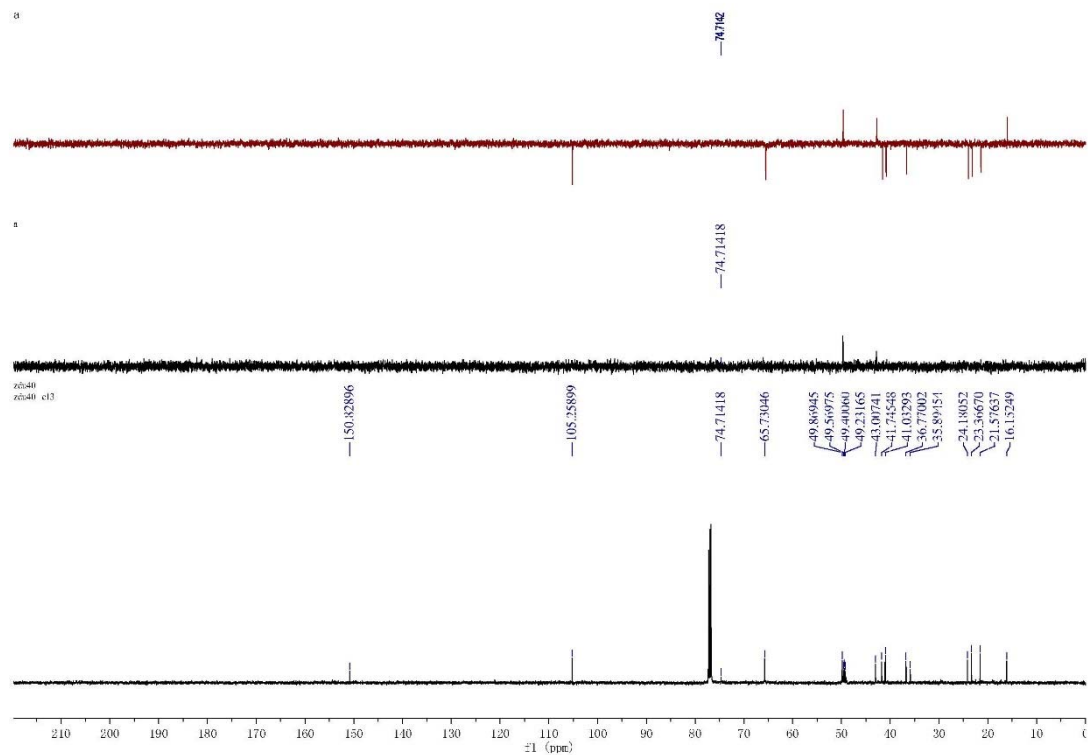

S89: HSQC of auranticanol M (24)

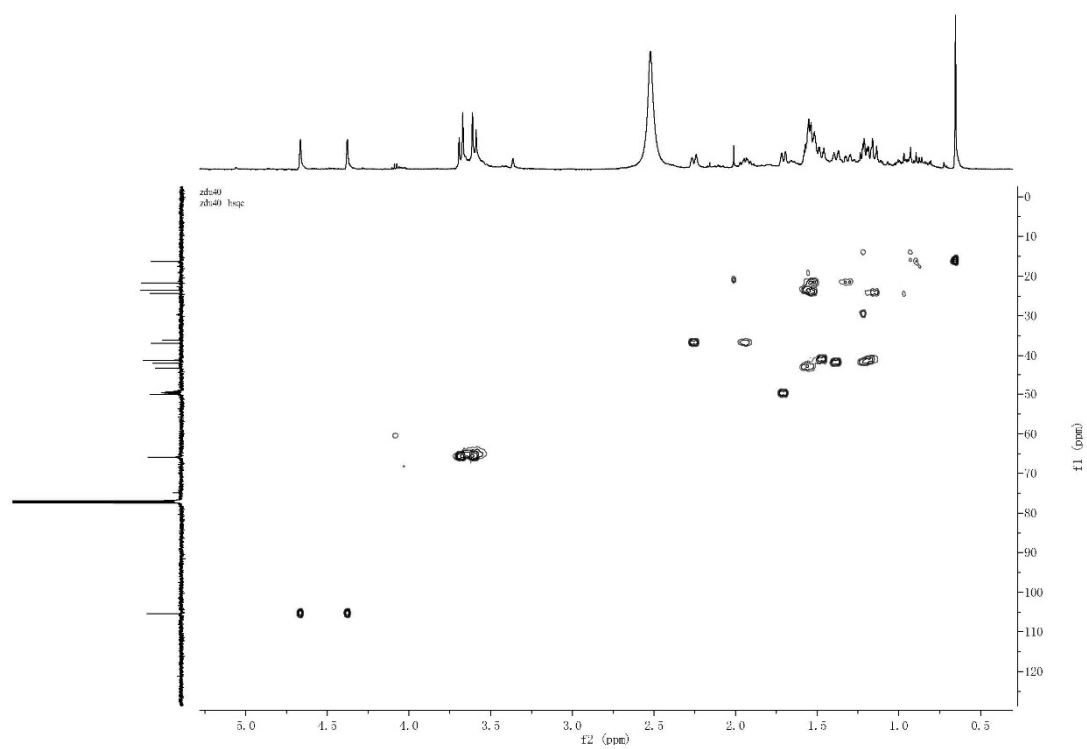

S90:  $^1\text{H}$ - $^1\text{H}$  COSY of auranticanol M (24)

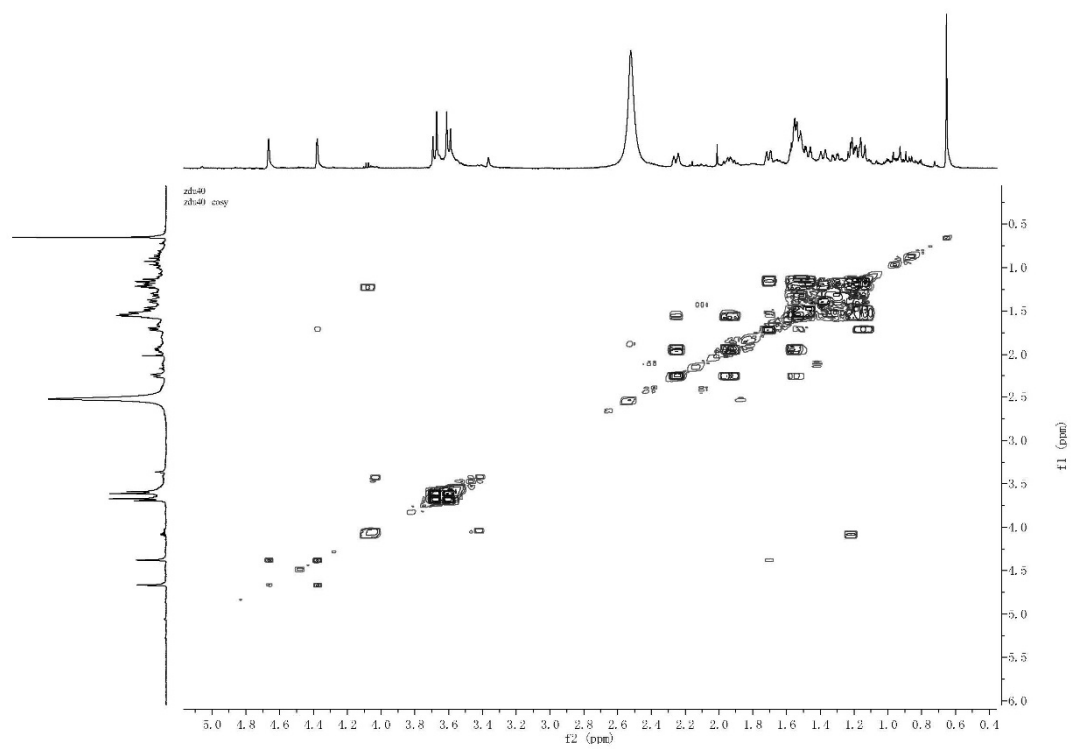



S91: HMBC of auranticanol M (24)

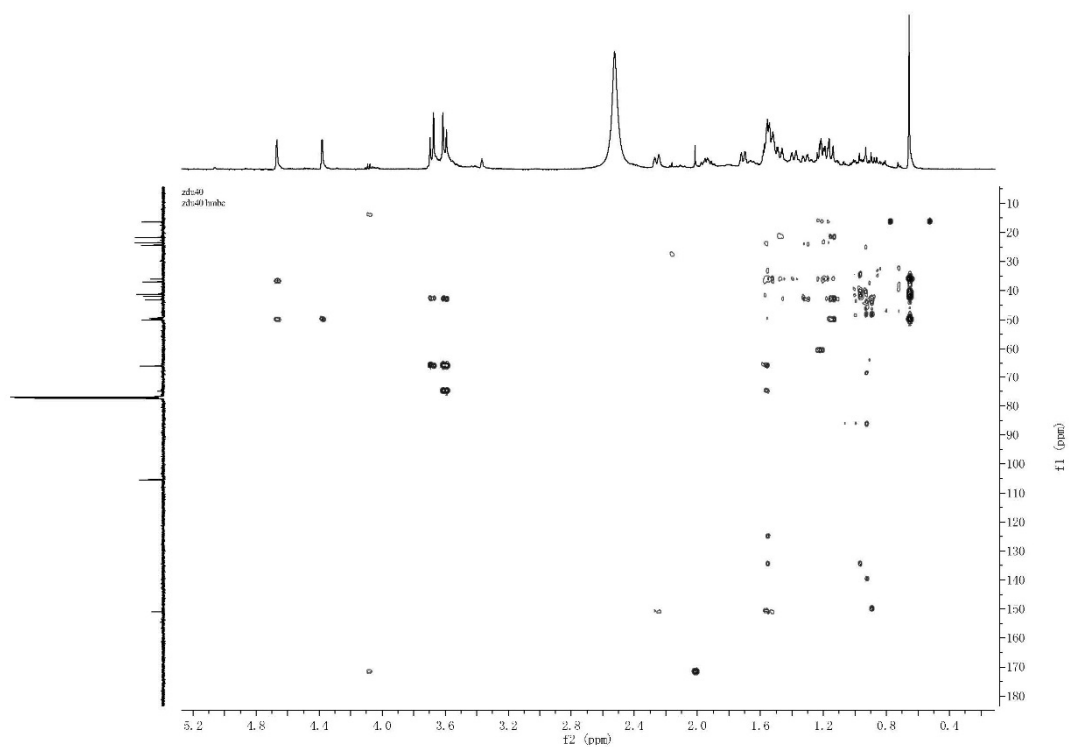

S92: ROESY of auranticanol M (24)

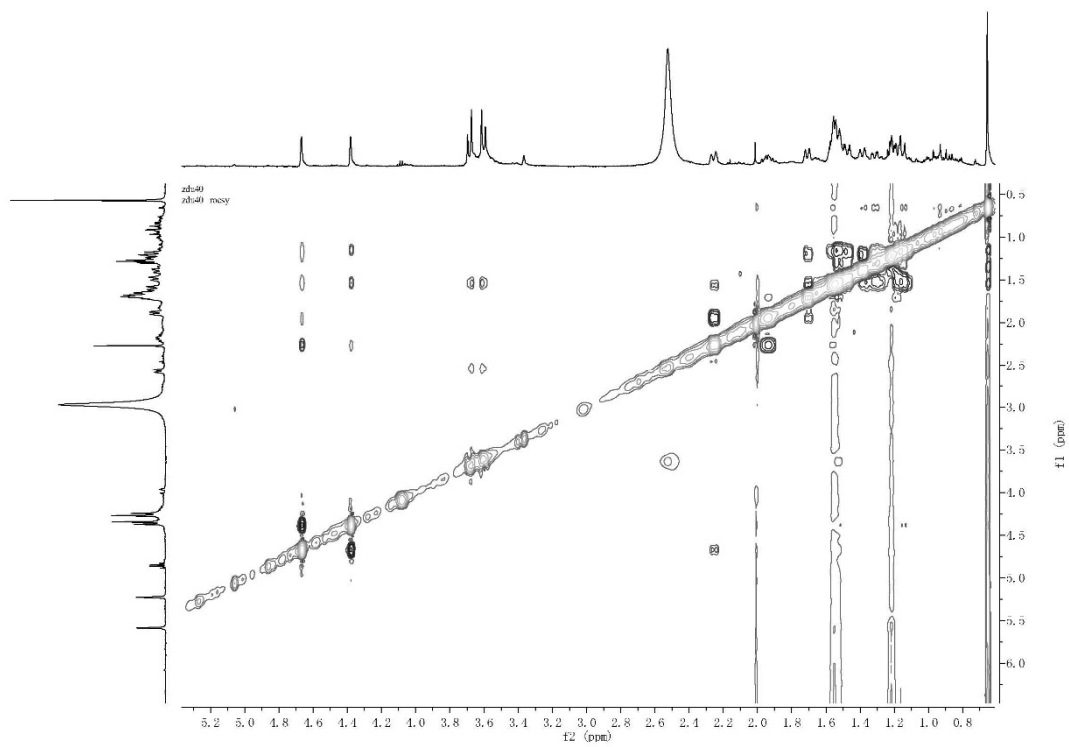

# S93: ESIMS of auranticanol M (24)

## Mass Spectrum List Report

| Analysis Info |                                         | Acquisition Date     |       |
|---------------|-----------------------------------------|----------------------|-------|
| Analysis Name | D:\DATA\2011file\1109\110922\zdu-4003.d | 9/21/2011 2:58:02 PM |       |
| Method        | ms_ptservice.m                          | Operator             | quyan |
| Sample Name   | zdu-40                                  | Instrument           | HCT   |

  

| Acquisition Parameter |            |              |            |                          |         |
|-----------------------|------------|--------------|------------|--------------------------|---------|
| Ion Source Type       | ESI        | Ion Polarity | Negative   | Alternating Ion Polarity | off     |
| Mass Range Mode       | Ultra Scan | Scan Begin   | 100 m/z    | Scan End                 | 700 m/z |
| Capillary Exit        | -40.0 Volt | Skimmer      | -40.0 Volt | Trap Drive               | 44.0    |
| Accumulation Time     | 5089 ps    | Averages     | 5 Spectra  | Auto MS/MS               | off     |

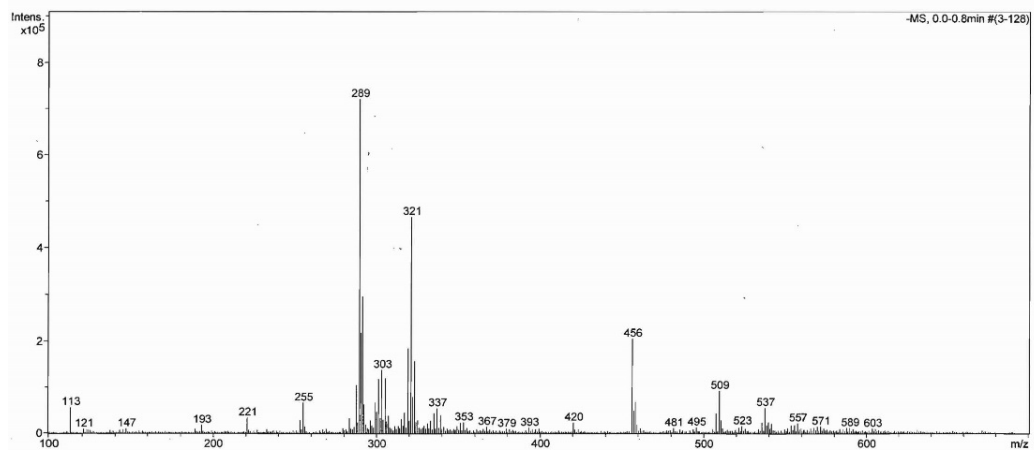

Supplement: c5ra17099k1.pdf [file c5ra17099k1.pdf]
